# Supplementary material for: Development and Validation of a Spanish-Language Protective Behavioral Strategies Scale for People Who Snort Cocaine: Evidence from Mexico, Colombia, and Chile
Source: Research Square preprint supplement (doi:10.21203/rs.3.rs-7041559/v1), 2025-07-10
Supplement: Supplementary file 1 [file 1a52a87fa2a4613d4697517a.xlsx]

## Sheet: Hoja 1
Antes del consumo de cocaína
Ítem 1. Planeo mi consumo, determinando las condiciones bajo las que voy a consumir.
Ítem 2. Consumo cocaína cuando siento malestar físico (dolor corporal, cansancio) o durante el curso de una enfermedad.
Ítem 3. Consumo cocaína cuando siento malestar emocional (tristeza, ansiedad, etc)
Ítem 4. Consumo cocaína antes de un evento importante (p.ej. un examen, una entrevista de trabajo o una competencia deportiva).
Ítem 5. Me alimento antes de una ocasión de consumo de cocaína.
Ítem 6. Adquiero con anterioridad la sustancia y no en la fiesta, el festival o en la calle.
Ítem 7. Adquiero la cocaína de una fuente confiable, por ejemplo un vendedor(a) al que frecuento o un amigo(a) o conocido(a).
Ítem 8. Evalúo/checo/verifico la calidad o pureza de la cocaína antes de consumirla, por ejemplo por su aspecto, olor, sabor, efecto de una pequeña cantidad sobre la lengua o haciendo uso de pruebas de detección de cocaína o servicios de análisis de sustancias.
Ítem 9. Tengo varios proveedores de cocaína disponibles.
Ítem 10. Guardo la cocaína y los instrumentos que uso para consumirla en un lugar adecuado para evitar problemas con otras personas, por ejemplo con la policía o mi familia.
Durante el consumo de cocaína
Ítem 1. Consumo cocaína solo(a).
Ítem 2. Consumo cocaína en compañía de personas en quien(es) confío.
Ítem 3. Consumo cocaína en ambientes que considero seguros, por ejemplo en una casa.
Ítem 4. Consumo cocaína aunque sospeche o sepa que está adulterada o es de mala calidad.
Ítem 5. Utilizo pitillos/popotes desechables para aspirar cocaína.
Ítem 6. Utilizo billetes como instrumentos para aspirar cocaína.
Ítem 7. Antes de consumir desinfecto con alcohol o cloro los instrumentos (tarjetas, cucharas o llaves) que voy a usar para el consumo.
Ítem 8. Deshago los pedazos grandes de cocaína pulverizándolos, picándolos o triturándolos.
Ítem 9. Alterno mis fosas nasales al aspirar cocaína, es decir, aspiro cocaína primero por una fosa nasal y luego por la otra.
Ítem 10. Comparto con otras personas los instrumentos que uso para consumir cocaína, por ejemplo tubos, tarjetas, cucharas o llaves.
Ítem 11. En cada ocasión de consumo, establezco una cantidad de cocaína límite para consumir y no la sobrepaso.
Ítem 12. En cada ocasión de consumo, establezco una cantidad de dinero para gastar en cocaína y no la sobrepaso.
Ítem 13. Después de un tiempo sin consumir cocaína, si decido que quiero volver a consumir, reduzco la cantidad.
Ítem 14. Inicio con una dosis baja de cocaína y dependiendo de como me siento decido si quiero consumir más.
Ítem 15. Dejo pasar al menos una hora entre una dosis (pase, línea, grapa) y la siguiente.
Ítem 16. Cuando estoy sudando exesivamente por consumir cocaína, me muevo a un lugar más ventilado.
Ítem 16. Cuando siento que mi corazón late rapidamente por consumir cocaína, me retiro a descansar al menos por un momento.
Ítem 17. Consumo cocaína que me ofrecen o regalan otras personas.
Ítem 18. Consumo cocaína cuando otros me presionan.
Ítem 19. Consumo otras sustancias al mismo tiempo con la cocaína, por ejemplo alcohol, tabaco, marihuana, éxtasis, etc.
Ítem 20. Cuando consumo cocaína al mismo tiempo con otras sustancias modero o disminuyo la cantidad de ambas.
Ítem 21. Cuando consumo cocaína tomo agua.
Ítem 22. Mastico chicles (goma de mascar) o como dulces para evitar la tensión de la mandíbula.
Ítem 23. Detengo el consumo de cocaína si percibo efectos negativos como por ejemplo ansiedad, irritabilidad, palpitaciones, dolor y/o presión en el pecho, dolor de cabeza, migraña, convulsiones, sangrado nasal, dificultad para respirar, etc.
Ítem 24. Cuando siento efectos negativos con la cocaína (ansiedad, mal viaje o estimulación excesiva), trato de calmarme controlando mi respiración.
Ítem 25. Cuando siento efectos negativos más intensos con la cocaína (palpitaciones, dolor y/o presión en el pecho, dolor de cabeza, migraña, convulsiones, sangrado nasal, dificultad para respirar, etc.) busco atención profesional.
Ítem 26. Detengo el consumo de cocaína si se presenta una situación difícil de manejar como por ejemplo una riña, un conflicto con la ley, si alguien se accidenta o le da una sobredosis.
Ítem 28. Utilizo preservativos/condones durante las relaciones sexuales que tengo bajo los efectos de la cocaína.
Ítem 29. Llevo conmigo una cantidad permitida de cocaína en el país en que me encuentro (dosis mínima legal).
Ítem 30. Conduzco un vehículo u opero una máquina bajo los efectos de la cocaína.
Ítem 31. Tomo un transporte seguro cuando estoy bajo el efecto de la cocaína (un conductor designado o un servicio público).
Después del consumo de cocaína
Ítem 1. Limpio mis fosas nasales con agua o suero después de una ocasión de consumo.
Ítem 2. Humecto mis fosas nasales con bálsamo, aceite o crema después del consumo de cocaína.
Ítem 3. Descanso después de consumir cocaína.
Ítem 4. Me alimento después de consumir cocaína.
Ítem 5. Me hidrato con agua o suero después de consumir cocaína.
Ítem 6. Realizo actividades que disfruto para contrarrestar el bajón (un estado de ánimo negativo que aparece después del consumo de cocaína).
Ítem 7. Cuando me expongo a una situación de riesgo (por ejemplo golpes, lesiones o relaciones sexuales sin protección), busco atención médica o jurídica para atender las consecuencias negativas.
Ítem 8. Consumo más cocaína para evitar el bajón (un estado de ánimo negativo que aparece después del consumo de cocaína).
Ítem 9. Dejo pasar al menos tres semanas entre una ocasión de consumo y la otra.
Ítem 10. Disminuyo la cantidad y frecuencia del consumo de cocaína si percibo efectos negativos en diferentes áreas de mi vida como por ejemplo problemas físicos, psicológicos o sociales (familiares, laborales/académicos, económicos, legales, etc)
Evitación/moderación del consumo de cocaína
Ítem 1. Cuando no quiero consumir cocaína realizo otras actividades que disfruto como por ejemplo ir a comer, ir al cine, salir con personas que no consumen cocaína, etc.
Ítem 2. Cuando no quiero consumir cocaína dirijo o pongo mi atención a otros aspectos importantes de mi vida como el trabajo, estudio, la familia o amigos.
Ítem 3. Cuando no quiero consumir cocaína, busco realizar actividades que me ayudan a manejar el deseo o la ansiedad, como hacer deporte o meditar.
Ítem 4. Tengo disponible una dosis de reserva de cocaína, por ejemplo en mi billetera, cartera o en mi hogar.
Ítem 5. Busco asesoría de un profesional de la salud (un psicólogo/a, médico/a o consejero/a en adicciones) si percibo efectos negativos por el consumo de cocaína, como incapacidad para moderar el consumo, problemas físicos, psicológicos o sociales.
