# Supplementary material for: Development and Validation of a Spanish-Language Protective Behavioral Strategies Scale for People Who Snort Cocaine: Evidence from Mexico, Colombia, and Chile
Source: Research Square preprint supplement (doi:10.21203/rs.3.rs-7041559/v1), 2025-07-10
Supplement: Supplementary file 2 [file 1e5ed38401366061b7b2ad82.xlsx]

## Sheet: Hoja1
			Corina Benjet	Julian Quintero	Michelle Mateus Yepes	Ruben Diaz Conti	Vannesa morris	Juan Camilo Carvajal Rojas	Desviación estandar	Media	Después de observaciones
SUBESCALA ANTES	Ítem 1. Planeo mi consumo por ejemplo estableciendo una hora de inicio y fin de consumo, un lugar en donde consumir y con quien hacerlo (dónde, cuándo y con quién).	Coherencia	3	3	3	2	4	4	0.752773	3.16667	Ítem 1. Planeo mi consumo, determinando las condiciones bajo las que voy a consumir.
		Relevancia	4	4	3	2	4	4	0.83666	3.5
		Claridad	3	4	2	1	4	4	1.26491	3
		Observación	El item tiene 3 componentes planear la hora, el lugar y con quien. A veces las personas tienen dificultades cuando hay mas de un componente porque pueden decir planeo con quien pero no cuando y donde, por ejemplo. Sería mejor romper este item en 3 items		Si la persona realiza una de las acciones planteadas, pero no todas, podría entrar en conflicto sobre cómo calificar. Sugiero una tabla y preguntar por los ítems que corresponden a la planeación del consumo. De este modo se podría identificar cuáles son las prácticas de planeación que son relevantes para el usuario.
	Ítem 2. Me siento bien físicamente antes de consumir cocaína.	Coherencia	4	3	4	3	2	4	0.816497	3.33333	Ítem 2. Consumo cocaína cuando siento malestar físico (dolor corporal, cansancio) o durante el curso de una enfermedad.
		Relevancia	4	4	4	2	3	4	0.83666	3.5
		Claridad	4	3	4	3	2	4	0.816497	3.33333
		Observación		Le agregaría que debe sentirse bien físicamente y psicológicamente		Tambien se consume cocaina para superar un malestar, por ejemplo personas que para superar una resaca o un bajón recurren a un par de líneas	Se podría re plantear por ¿Considera que cada ves que consume cocaína se ve afectada su salud física?siempre , casi siempre , etc
	Ítem 3. Me siento bien anímicamente o emocionalmente antes de consumir cocaína.	Coherencia	4	3	4	3	4	3	0.547723	3.5	Ítem 3. Consumo cocaína cuando siento malestar emocional (tristeza, ansiedad, etc)
		Relevancia	4	4	4	3	4	4	0.408248	3.83333
		Claridad	3	4	4	3	4	3	0.547723	3.5
		Observación	escoger usar la palabra animicamente o emocionalmente pero no ambas para no confundir a los respondientes	lo dicho		es una pregunta similar a la que le antecede, no la considero relevante, seria bueno poder regresar a las preguntas anteriores para modificar las respuestas		se sugiere tal vez abordar mas en detalle y agregar algunos ejemplos demás en relación a algunos trastornos de salud mental pues muchas personas usuarias a veces no tienen muy claro que tipo de afectaciones se consideran problemas de salud mental
	Ítem 4. Consumo cocaína antes de un evento importante (p.ej. un examen, una entrevista de trabajo o una competencia deportiva).	Coherencia	4	4	3	4	4	4	0.408248	3.83333	Ítem 4. Consumo cocaína antes de un evento importante (p.ej. un examen, una entrevista de trabajo o una competencia deportiva).	No se acepta la sugerencia puesto que el instrumento es general.
		Relevancia	4	4	4	4	4	4	0	4
		Claridad	4	4	2	4	4	4	0.816497	3.66667
		Observación			¿La población objetivo son estudiantes, trabajadores? Dependiendo de ello, sugiero priorizar unos eventos de interés para que la persona indique si usa antes cocaína
	Ítem 5. Me alimento bien/adecuadamente antes de una ocasión de consumo de cocaína.	Coherencia	4	4	4	4	4	4	0	4	Ítem 5. Me alimento antes de una ocasión de consumo de cocaína.
		Relevancia	4	4	4	3	4	4	0.408248	3.83333
		Claridad	3	4	4	4	4	3	0.516398	3.66667
		Observación	decidir si preguntar bien o adecuadamente, yo optaría por adecuadamente			Quizás no sea tan relevante puesto que muchos consumidores de cocaina tienen malos hábitos alimenticios y asumo que la mayoría responderá que no se alimenta bien		Se recomienda especificar un poco mas en detalle que es comer bien o hidratarse bien, pues para algunas personas comer bien no es sinónimo de comer saludable.
	Ítem 6. Adquiero con anterioridad la sustancia y no en la fiesta, el festival o en la calle.	Coherencia	4	4	4	4	4	4	0	4	Ítem 6. Adquiero con anterioridad la sustancia y no en la fiesta, el festival o en la calle.
		Relevancia	4	4	4	4	4	4	0	4
		Claridad	4	4	4	4	4	4	0	4
		Observación
	Ítem 7. Adquiero la cocaína de una fuente confiable, por ejemplo un vendedor(a) al que frecuento o un amigo(a) o conocido(a).	Coherencia	4	4	4	4	4	4	0	4	Ítem 7. Adquiero la cocaína de una fuente confiable, por ejemplo un vendedor(a) al que frecuento o un amigo(a) o conocido(a).
		Relevancia	4	4	4	4	4	4	0	4
		Claridad	4	4	4	4	4	4	0	4
		Observación
	Ítem 8. Evalúo/checo/verifico la calidad o pureza de la cocaína antes de consumirla, por ejemplo por su aspecto, olor, sabor, efecto de una pequeña cantidad sobre la lengua o haciendo uso de pruebas de detección de cocaína o servicios de análisis de sustancias.	Coherencia	4	4	3	4	4	4	0.408248	3.83333	Ítem 8. Evalúo/checo/verifico la calidad o pureza de la cocaína antes de consumirla, por ejemplo por su aspecto, olor, sabor, efecto de una pequeña cantidad sobre la lengua o haciendo uso de pruebas de detección de cocaína o servicios de análisis de sustancias.
		Relevancia	4	4	4	4	4	4	0	4
		Claridad	4	4	2	4	4	4	0.816497	3.66667
		Observación			Dado que es un mercado ilegal, las estrategias evaluar la calidad de la sustancia está mediada por mitos o experiencias pasadas (por ejemplo: su aspecto, olor, sabor, efecto de una pequeña cantidad sobre la lengua) o servicio de análisis de sustancia que podría generar mayor confiabilidad. No obstante, son estrategias distinta con alcances y resultados distintos. Valdría la pena priorizar la estr…
	Ítem 9. Tengo varios proveedores de cocaína disponibles.	Coherencia	4	4	4	4	4	4	0	4	Ítem 9. Tengo varios proveedores de cocaína disponibles.	No se aceptan sugerencias puesto que no son relevantes
		Relevancia	4	4	4	2	4	4	0.816497	3.66667
		Claridad	4	4	4	4	4	3	0.408248	3.83333
		Observación				No veo que sea tan relevante esta pregunta		Se sugiere indicar también que el tener diferentes proveedores, como factor de riesgo, aumenta la probabilidad de adulterantes y suplantadores que pueden ser peligrosos.
	Ítem 10. Guardo la cocaína y los instrumentos que uso para consumirla en un lugar adecuado para evitar problemas con otras personas, por ejemplo con la policía o mi familia.	Coherencia	4	3	4	3	4	4	0.516398	3.66667	Ítem 10. Guardo la cocaína y los instrumentos que uso para consumirla en un lugar adecuado para evitar problemas con otras personas, por ejemplo con la policía o mi familia.
		Relevancia	4	3	4	3	4	4	0.516398	3.66667
		Claridad	4	2	4	4	4	4	0.816497	3.66667
		Observación		lo dicho		Es dificil tener un epsacio seguro que no sea en el hogar para resguardar las herramientas de consumo o la misma sustancia, en la mayoria de los casos la cocaina se consume en contextos fuera de espacios controlados, como en la calle, en la fiesta, etc
	SUFICIENCIA SUBESCALA	Suficiencia	3	4	3	4	3	3	0.516398	3.33333	SUFICIENCIA SUBESCALA
		Observación	Sí son suficientes para dividiría el item de planeación en 3		Sugeriría revisar la relación de la pregunta 10 con el marco: "ANTES DEL CONSUMO". También incorporar algo frente: si involucro amigos o decido usarlo sólo en rumba/trabajo/estudio.		Le agregaría un ítem relacionado si prepara la parafernalia para consumir como por ejemplo, pollitos, rulos, si la pica, la seca en miicrohondas, si la disuelve , antes de consumirla	Tal vez como posibilidad se podría agregar algo sobre: si se planean propósitos y si se tienen claras las motivaciones individuales antes del consumo de cocaína (Se tiene claro el porque hacer), ya que como factor protector, puede indicar el nivel de autoconocimiento, tanto propio como de la sustancia, permitiendo arrojar una estadística en cuanto las razones de toma de decisiones frente al uso d…
SUBESCALA DURANTE	Ítem 1. Consumo cocaína solo(a).	Coherencia	4	3	4	4	4	4	0.408248	3.83333	Ítem 1. Consumo cocaína solo(a).
		Relevancia	4	3	4	4	4	4	0.408248	3.83333
		Claridad	4	3	4	4	4	4	0.408248	3.83333
		Observación		El riesgo de sobredosis puede ser uno , pero es un indicador de dependencia consumir solo o de consumo problemático, aunque hay gente que consume para la funcionalidad en diferentes labores.
	Ítem 2. Consumo cocaína en compañía de personas en quien(es) confío.	Coherencia	4	4	4	4	4	4	0	4	Ítem 2. Consumo cocaína en compañía de personas en quien(es) confío.
		Relevancia	4	4	4	4	4	4	0	4
		Claridad	4	4	4	4	4	4	0	4
		Observación
	Ítem 3. Consumo cocaína en ambientes que considero seguros, por ejemplo en una casa.	Coherencia	4	4	4	4	4	4	0	4	Ítem 3. Consumo cocaína en ambientes que considero seguros, por ejemplo en una casa.
		Relevancia	4	4	4	4	4	4	0	4
		Claridad	4	4	4	4	4	4	0	4
		Observación
	Ítem 4. Consumo cocaína aunque sospeche o sepa que está adulterada o es de mala calidad.	Coherencia	4	3	4	4	4	4	0.408248	3.83333	Ítem 4. Consumo cocaína aunque sospeche o sepa que está adulterada o es de mala calidad.
		Relevancia	4	3	4	4	4	4	0.408248	3.83333
		Claridad	4	3	4	4	4	4	0.408248	3.83333
		Observación		lo que pasa es que a veces no hay posibilidad de consumir otra cosa.. pero mucha gente, especialmente mayor si no es buena cocaina o la que conoce prefiere no consumir, consumir cualquier cosa es síntoma de dependencia podría ser.
	Ítem 5. Utilizo instrumentos como tubos desechables para aspirar cocaína.	Coherencia	4	3	4	4	4	4	0.408248	3.83333	Ítem 5. Utilizo pitillos/popotes desechables para aspirar cocaína.
		Relevancia	4	3	4	4	4	4	0.408248	3.83333
		Claridad	4	3	3	4	4	4	0.516398	3.66667
		Observación		no solo serian tubos, la pregunta podría ser, usa parafernalia de consumo solo para usted o la comparte.	Incorporar otros elementos que se emplean en el consumo de cocaìna
	Ítem 6. Utilizo billetes como instrumentos para aspirar cocaína.	Coherencia	4	4	4	4	4	4	0	4	Ítem 6. Utilizo billetes como instrumentos para aspirar cocaína.
		Relevancia	4	4	4	4	4	4	0	4
		Claridad	4	4	4	4	4	4	0	4
		Observación
	Ítem 7. Antes de consumir desinfecto con alcohol o cloro los instrumentos (tarjetas, cucharas o llaves) que voy a usar para el consumo.	Coherencia	4	4	4	4	4	4	0	4	Ítem 7. Antes de consumir desinfecto con alcohol o cloro los instrumentos (tarjetas, cucharas o llaves) que voy a usar para el consumo.
		Relevancia	4	4	4	4	4	4	0	4
		Claridad	4	4	4	4	4	4	0	4
		Observación
	Ítem 8. Deshago los pedazos grandes de cocaína pulverizándolos, picándolos o triturándolos.	Coherencia	4	4	4	4	4	4	0	4	Ítem 8. Deshago los pedazos grandes de cocaína pulverizándolos, picándolos o triturándolos.
		Relevancia	4	4	4	3	4	4	0.408248	3.83333
		Claridad	4	4	4	4	4	4	0	4
		Observación				No veo en que pueda ser relevante esta pregunta
	Ítem 9. Alterno mis fosas nasales al aspirar cocaína, es decir, aspiro cocaína primero por una fosa nasal y luego por la otra.	Coherencia	4	3	4	4	4	4	0.408248	3.83333	Ítem 9. Alterno mis fosas nasales al aspirar cocaína, es decir, aspiro cocaína primero por una fosa nasal y luego por la otra.
		Relevancia	4	3	4	4	4	4	0.408248	3.83333
		Claridad	4	3	4	4	4	4	0.408248	3.83333
		Observación		se lava las fosas nasales después de consumir
	Ítem 10. Comparto con otras personas los instrumentos que uso para consumir cocaína, por ejemplo tubos, tarjetas, cucharas o llaves.	Coherencia	4	4	4	4	4	4	0	4	Ítem 10. Comparto con otras personas los instrumentos que uso para consumir cocaína, por ejemplo tubos, tarjetas, cucharas o llaves.
		Relevancia	4	4	4	4	4	4	0	4
		Claridad	4	4	4	4	4	4	0	4
		Observación
	Ítem 11. En cada ocasión de consumo, establezco una cantidad de cocaína límite para consumir y no la sobrepaso.	Coherencia	4	3	4	4	4	4	0.408248	3.83333	Ítem 11. En cada ocasión de consumo, establezco una cantidad de cocaína límite para consumir y no la sobrepaso.
		Relevancia	4	3	4	4	4	4	0.408248	3.83333
		Claridad	4	4	4	4	4	4	0	4
		Observación
	Ítem 12. En cada ocasión de consumo, establezco una cantidad de dinero para gastar en cocaína y no la sobrepaso.	Coherencia	4	4	4	4	4	4	0	4	Ítem 12. En cada ocasión de consumo, establezco una cantidad de dinero para gastar en cocaína y no la sobrepaso.
		Relevancia	4	4	4	4	4	4	0	4
		Claridad	4	4	4	4	4	4	0	4
		Observación
	Ítem 13. Después de un tiempo sin consumir cocaína, si decido que quiero volver a consumir, reduzco la cantidad.	Coherencia	4	3	4	4	4	4	0.408248	3.83333	Ítem 13. Después de un tiempo sin consumir cocaína, si decido que quiero volver a consumir, reduzco la cantidad.	No se acepta la sugerencia
		Relevancia	4	3	4	4	4	4	0.408248	3.83333
		Claridad	4	3	4	4	4	4	0.408248	3.83333
		Observación		preguntar cuando hay detox como regresa la consumo.... seri bueno preguntar la autorregulación d ela gente.. no todos tenemos la misma tolerancia o el mismo cuerpo el el mismo efecto o el uso de la sustancias.. hay que preguntar por la opinión d ela gente.. una cosa es lo que pensamos los médicos y psiquiatras desde afuera y otra como la gente se autoregula o conoce sus limites.
	Ítem 14. Inicio con una dosis baja de cocaína y dependiendo de como me siento decido si quiero consumir más.	Coherencia	4	3	4	4	4	4	0.408248	3.83333	Ítem 14. Inicio con una dosis baja de cocaína y dependiendo de como me siento decido si quiero consumir más.
		Relevancia	4	3	4	4	4	4	0.408248	3.83333
		Claridad	4	4	4	4	4	4	0	4
		Observación		hay practicas de consumo de gente que inicia con dosis altas.. y luego va con doss bajas.. le gusta el golpe duro..,, y luego irse regulando..
	Ítem 15. Dejo pasar al menos una hora entre una dosis (pase, línea, grapa) y la siguiente.	Coherencia	4	3	4	4	4	4	0.408248	3.83333	Ítem 15. Dejo pasar al menos una hora entre una dosis (pase, línea, grapa) y la siguiente.
		Relevancia	4	3	4	4	4	4	0.408248	3.83333
		Claridad	4	3	4	4	4	4	0.408248	3.83333
		Observación		el tiempo entre consumo y consumo, depende de mas cosas como por ejemplo la calidad en la sustancia y la mezcla o no con alcohol por ejemplo. eso determina màs las periodicidad del consumo a que uno mismo se la fije, si es mala seguro hay mucho consumo, si se consume alguno y noctina de pronto mas aun esi no se mezcla
	Ítem 16. Vigilo mis signos vitales cuando estoy bajo los efectos de la cocaína, por ejemplo mi temperatura, mis palpitaciones, etc.	Coherencia	4	3	4	3	4	4	0.516398	3.66667	Ítem 16. Cuando estoy sudando exesivamente por consumir cocaína, me muevo a un lugar más ventilado.
		Relevancia	4	3	4	4	4	4	0.408248	3.83333
		Claridad	4	4	2	4	4	4	0.816497	3.66667	Ítem 16. Cuando siento que mi corazón late rapidamente por consumir cocaína, me retiro a descansar al menos por un momento.
		Observación		mas que vigilar, que no pasa, es si le presta atención a los síntomas de sobredosis cuando se presentan, la taquicardia, la sudoración, el mareo, la respiración, el brazo izquierdo que duele.. no es tanto montear, es responder y atender las señales del cuerpo.	Sugiero: "Vigilo: XXXX, XXXXX, XXXX o XXXXX, cuando estoy bajo los efectos del alcohol." Las personas generalmente no conocen ni piensan en término de signos vitales	No es 100% coherente puesto que los consumidores difícilmente tienen a la mano herramientas para medir temperatura o ritmo cardiaco
	Ítem 17. Consumo cocaína que me ofrecen o regalan otras personas.	Coherencia	4	3	4	4	4	4	0.408248	3.83333	Ítem 17. Consumo cocaína que me ofrecen o regalan otras personas.
		Relevancia	4	3	4	4	4	4	0.408248	3.83333
		Claridad	4	4	3	4	4	4	0.408248	3.83333
		Observación		a cualquiera no se le recibe	¿Si se la regala un amigo se incluye en esta pregunta? Creo que había una pregunta frente a los amigos, pero revisar para que respondan a elementos diferentes.
	Ítem 18. Consumo cocaína cuando otros me presionan.	Coherencia	4	4	4	3	4	4	0.408248	3.83333	Ítem 18. Consumo cocaína cuando otros me presionan.	No se acepta la sugerencia porque la redación resulta más confusa
		Relevancia	4	4	4	4	4	4	0	4
		Claridad	4	4	4	4	4	4	0	4
		Observación				Quizas podria planetarse de manera distinta esta pregunta, por ejemplo, "He llegado a consumir cocaina por presión social"
	Ítem 19. Consumo otras sustancias al mismo tiempo con la cocaína, por ejemplo alcohol, tabaco, marihuana, éxtasis, etc.	Coherencia	4	4	4	4	4	4	0	4	Ítem 19. Consumo otras sustancias al mismo tiempo con la cocaína, por ejemplo alcohol, tabaco, marihuana, éxtasis, etc.	No se acepta sugerencia
		Relevancia	4	4	4	4	4	4	0	4
		Claridad	4	3	4	4	4	4	0.408248	3.83333
		Observación		la partitura en unas dos tres sopcines.. mezcla con 1) alcohol, 2) nicotina, 3) cannabis, 4) MDMA, 5) Popper, 6) viagra etc. ec.t.. seria bueno intentar indagar por cada mezcla de consumo y si se dan do s o tres sustancia so mas.
	Ítem 20. Cuando consumo cocaína al mismo tiempo con otras sustancias modero o disminuyo la cantidad de ambas.	Coherencia	4	4	4	4	4	4	0	4	Ítem 20. Cuando consumo cocaína al mismo tiempo con otras sustancias modero o disminuyo la cantidad de ambas.	No se acepta sugerencia
		Relevancia	4	4	4	4	4	4	0	4
		Claridad	4	3	4	3	4	4	0.516398	3.66667
		Observación		a veces se consume mas, por ejemplo con alcohol		Quizás el planteamiento de esta pregunta podría ser distinto, pro ejemplo usar la frase "en combinación con otras sustancias"
	Ítem 21. Cuando consumo cocaína tomo agua.	Coherencia	4	4	4	4	4	4	0	4	Ítem 21. Cuando consumo cocaína tomo agua.
		Relevancia	4	4	4	4	4	4	0	4
		Claridad	4	4	4	4	4	4	0	4
		Observación
	Ítem 22. Mastico chicles (goma de mascar) o como dulces para evitar la tensión de la mandíbula.	Coherencia	4	4	4	4	4	4	0	4	Ítem 22. Mastico chicles (goma de mascar) o como dulces para evitar la tensión de la mandíbula.
		Relevancia	4	4	4	4	4	4	0	4
		Claridad	4	4	4	4	4	4	0	4
		Observación
	Ítem 23. Detengo el consumo de cocaína si percibo efectos negativos como por ejemplo ansiedad, irritabilidad, palpitaciones, dolor y/o presión en el pecho, dolor de cabeza, migraña, convulsiones, sangrado nasal, dificultad para respirar, etc.	Coherencia	4	4	4	4	4	4	0	4	Ítem 23. Detengo el consumo de cocaína si percibo efectos negativos como por ejemplo ansiedad, irritabilidad, palpitaciones, dolor y/o presión en el pecho, dolor de cabeza, migraña, convulsiones, sangrado nasal, dificultad para respirar, etc.
		Relevancia	4	4	4	4	4	4	0	4
		Claridad	4	4	4	4	4	4	0	4
		Observación
	Ítem 24. Cuando siento efectos negativos con la cocaína (ansiedad, mal viaje o estimulación excesiva), trato de calmarme controlando mi respiración.	Coherencia	4	4	4	4	4	3	0.408248	3.83333	Ítem 24. Cuando siento efectos negativos con la cocaína (ansiedad, mal viaje o estimulación excesiva), trato de calmarme controlando mi respiración.
		Relevancia	4	4	4	4	4	3	0.408248	3.83333
		Claridad	4	4	4	4	4	3	0.408248	3.83333
		Observación						Recomiendo dar un poco mas de claridad con el tema de la respiración (como estrategia) pues muchas personas usuarias no saben que el control de la respiración puede ayudar a disminuir los efectos negativos psicológicos de la cocaína.
	Ítem 25. Cuando siento efectos negativos más intensos con la cocaína (palpitaciones, dolor y/o presión en el pecho, dolor de cabeza, migraña, convulsiones, sangrado nasal, dificultad para respirar, etc.) busco atención profesional.	Coherencia	4	4	4	4	4	4	0	4	Ítem 25. Cuando siento efectos negativos más intensos con la cocaína (palpitaciones, dolor y/o presión en el pecho, dolor de cabeza, migraña, convulsiones, sangrado nasal, dificultad para respirar, etc.) busco atención profesional.	Se acepta sugerencia de recalcar en más intensos
		Relevancia	4	4	3	4	4	4	0.408248	3.83333
		Claridad	4	4	4	4	4	4	0	4
		Observación			Revisar con la pregunta similar, para que quede clara la diferencia entre los síntomas y el actual
	Ítem 26. Detengo el consumo de cocaína si se presenta una situación difícil de manejar como por ejemplo una riña, un conflicto con la ley, si alguien se accidenta o le da una sobredosis.	Coherencia	4	4	4	4	4	4	0	4	Ítem 26. Detengo el consumo de cocaína si se presenta una situación difícil de manejar como por ejemplo una riña, un conflicto con la ley, si alguien se accidenta o le da una sobredosis.
		Relevancia	4	4	4	4	4	4	0	4
		Claridad	4	4	4	4	4	4	0	4
		Observación
	Ítem 27. Llevo conmigo preservativos/condones y los guardo en un lugar seguro para evitar dañarlos.	Coherencia	4	4	4	4	4	4	0	4	Ítem 27. Llevo conmigo preservativos/condones.	Se acepta sugerencia, eliminando guardarlos en un lugar seguro.
		Relevancia	4	4	4	4	4	4	0	4
		Claridad	3	4	4	4	4	4	0.408248	3.83333
		Observación	Aqui ha dos ideas en un item, llevar condones y guardarlos en un lugar seguro. Es posible llevarlos si guardarlos en un lugar seguro por lo cual dividiría el item en dos o eliminaría la parte de guardar en un lugar seguro
	Ítem 28. Utilizo preservativos/condones durante las relaciones sexuales que tengo bajo los efectos de la cocaína.	Coherencia	4	4	4	4	4	4	0	4	Ítem 28. Utilizo preservativos/condones durante las relaciones sexuales que tengo bajo los efectos de la cocaína.	Se acepta sugerencia	Incluir opción no tengo relaciones sexuales bajo el consumo
		Relevancia	4	4	4	4	4	4	0	4
		Claridad	3	4	4	4	4	4	0.408248	3.83333
		Observación	Quizás una opción de no tengo relaciones sexuales bajo consumo de cocaína
	Ítem 29. Llevo conmigo una cantidad permitida de cocaína en el país en que me encuentro (dosis mínima legal).	Coherencia	4	4	3	4	4	4	0.408248	3.83333	Ítem 29. Llevo conmigo una cantidad permitida de cocaína en el país en que me encuentro (dosis mínima legal).
		Relevancia	4	4	4	4	4	4	0	4
		Claridad	4	4	4	4	4	4	0	4
		Observación			Por lo menos en Colombia la dosis mínima está es despenalizada, pero no hay un mercado legal de cocaína
	Ítem 30. Conduzco un vehículo u opero una máquina bajo los efectos de la cocaína.	Coherencia	4	4	4	4	4	4	0	4	Ítem 30. Conduzco un vehículo u opero una máquina bajo los efectos de la cocaína.
		Relevancia	4	4	3	4	4	4	0.408248	3.83333
		Claridad	4	4	4	4	4	4	0	4
		Observación			Revisar la línea de las preguntas, percibo un salto entre la anterior pregunta y esta
	Ítem 31. Tomo un transporte seguro cuando estoy bajo el efecto de la cocaína, por ejemplo un servicio privado, evitando tomarlo en la calle.	Coherencia	4	4	4	4	4	4	0	4	Ítem 31. Tomo un transporte seguro cuando estoy bajo el efecto de la cocaína (un conductor designado o un servicio público).
		Relevancia	4	4	4	4	4	4	0	4
		Claridad	4	4	3	4	4	4	0.408248	3.83333
		Observación			¿Qué es un transporte seguro?, ¿el transporte público está en esta categoría o sólo taxi o por aplicación?
	SUFICIENCIA SUBESCALA	Suficiencia	4	4	3	4	4	3	0.516398	3.66667	SUFICIENCIA SUBESCALA
		Observación			El segmento resulta largo: revisar modalidad de aplicación y si hay preguntas que se pueden ajustar en presentación o posible agrupación			Como sugerencia se podría agregar un ítem como factor protector luego de: Vigilar signos vitales, sobre si el usuario vigila también su nivel de estimulación mental, pues evita el consumo excesivo, los malos viajes y se puede conectar muy bien con las siguientes preguntas sobre el autocontrol en el uso de la misma.			pregunten por ls superficie de consumo, si lo hace sobre mesas o celulares o si prepara la superficie y la limpia
SUBESCALA DESPUÉS	Ítem 1. Limpio mis fosas nasales con agua o suero después de una ocasión de consumo.	Coherencia	4	4	4	4	4	4	0	4	Ítem 1. Limpio mis fosas nasales con agua o suero después de una ocasión de consumo.	No se aceptan sugerencias puesto que son claras en otra parte del instrumento
		Relevancia	4	3	4	4	4	4	0.408248	3.83333
		Claridad	4	3	3	4	4	4	0.516398	3.66667
		Observación		No veo las vias de administración, cocaina puede ser esnifada, inyectada, fumada, oralmente..	"Después del consumo"
	Ítem 2. Humecto mis fosas nasales con bálsamo, aceite o crema después del consumo de cocaína.	Coherencia	4	4	4	4	4	4	0	4	Ítem 2. Humecto mis fosas nasales con bálsamo, aceite o crema después del consumo de cocaína.
		Relevancia	4	4	4	4	4	4	0	4
		Claridad	4	4	4	4	4	4	0	4
		Observación
	Ítem 3. Descanso lo suficiente después de consumir cocaína.	Coherencia	4	4	4	4	4	4	0	4	Ítem 3. Descanso después de consumir cocaína.	Se acepta sugerencia
		Relevancia	4	4	4	4	4	4	0	4
		Claridad	3	4	3	4	4	3	0.547723	3.5
		Observación	quizás quitar "lo suficiente" porque es una valoración sujeto, creo que con nada más "descanso después de consumir" está bien		¿Qué es un descanso...?			Recomiendo dar claridad en la palabra - Sufieciente- ¿Pues que es descansar lo suficiente?, para algunos usuarios puede ser una noche de sueño y para otros un par de días.
	Ítem 4. Me alimento bien o adecuadamente después de consumir cocaína.	Coherencia	4	4	4	4	4	4	0	4	Ítem 4. Me alimento después de consumir cocaína.
		Relevancia	4	3	4	4	4	4	0.408248	3.83333
		Claridad	3	3	4	4	4	3	0.547723	3.5
		Observación	Escoger si preguntar "bien" o "adecuadamente"	Seria bueno preguntar por el tipo de alimentación.. comer mucho.. o comer unas cosas diferente otras no necesariamente es comer bien....				Se sugiere especificar que es comer bien o adecuadamente
	Ítem 5. Me hidrato con agua o suero después de consumir cocaína.	Coherencia	4	4	4	4	4	4	0	4	Ítem 5. Me hidrato con agua o suero después de consumir cocaína.
		Relevancia	4	4	4	4	4	4	0	4
		Claridad	4	4	4	4	4	4	0	4
		Observación
	Ítem 6. Realizo actividades que disfruto para contrarrestar el bajón (un estado de ánimo negativo que aparece después del consumo de cocaína).	Coherencia	4	3	4	4	4	4	0.408248	3.83333	Ítem 6. Realizo actividades que disfruto para contrarrestar el bajón (un estado de ánimo negativo que aparece después del consumo de cocaína).
		Relevancia	4	3	4	4	4	4	0.408248	3.83333
		Claridad	4	3	4	4	4	4	0.408248	3.83333
		Observación		ojala preguntar por el tipo de sustancias que consumen para la fiesta psicoativa
	Ítem 7. Cuando me expongo a una situación de riesgo (por ejemplo golpes, lesiones o relaciones sexuales sin protección), busco atención médica o jurídica para atender las consecuencias negativas.	Coherencia	4	4	4	4	4	4	0	4	Ítem 7. Cuando me expongo a una situación de riesgo (por ejemplo golpes, lesiones o relaciones sexuales sin protección), busco atención médica o jurídica para atender las consecuencias negativas.
		Relevancia	4	4	4	4	4	4	0	4
		Claridad	4	4	4	4	4	4	0	4
		Observación
	Ítem 8. Consumo más cocaína para evitar el bajón (un estado de ánimo negativo que aparece después del consumo de cocaína).	Coherencia	4	3	4	4	4	4	0.408248	3.83333	Ítem 8. Consumo más cocaína para evitar el bajón (un estado de ánimo negativo que aparece después del consumo de cocaína).
		Relevancia	4	3	4	4	4	4	0.408248	3.83333
		Claridad	4	3	4	4	4	4	0.408248	3.83333
		Observación		lo dicho
	Ítem 9. Establezco un tiempo mínimo que debe pasar entre una ocasión de consumo y la otra (al menos de tres semanas) y lo cumplo.	Coherencia	4	4	4	4	4	4	0	4	Ítem 9. Dejo pasar al menos tres semanas entre una ocasión de consumo y la otra.
		Relevancia	4	4	4	4	4	4	0	4
		Claridad	2	4	4	4	4	4	0.816497	3.66667
		Observación	Es confusa. Si establezco un periodo mínimo de 2 semanas como contesto? Y si establezco un periodo mínimo de 3 semanas pero no lo cumplo como contesto? Hay dos cosas confusas, lo del periodo de 3 semanas y los dos componentes de establecer limite y cumplir o no cumplirlo
	Ítem 10. Disminuyo la cantidad y frecuencia del consumo de cocaína si percibo efectos negativos en diferentes áreas de mi vida como por ejemplo problemas físicos, psicológicos o sociales (familiares, laborales/académicos, económicos, legales, etc)	Coherencia	4	3	4	4	4	4	0.408248	3.83333	Ítem 10. Disminuyo la cantidad y frecuencia del consumo de cocaína si percibo efectos negativos en diferentes áreas de mi vida como por ejemplo problemas físicos, psicológicos o sociales (familiares, laborales/académicos, económicos, legales, etc)
		Relevancia	4	3	4	4	4	4	0.408248	3.83333
		Claridad	4	3	4	4	4	4	0.408248	3.83333
		Observación		la funcionalidad en el consumo
	SUFICIENCIA SUBESCALA	Suficiencia	4	4	4	4	4	3	0.408248	3.83333	SUFICIENCIA SUBESCALA
		Observación						No se que tan pertinente sea poder agregar un ítem sobre: El uso de sustancias en caso de problemas como factor de riesgo, algo como ¿en caso de que se presenten problemas o dificultades en la vida, se recurre al uso de cocaína para intentar solucionarlos?, ya que puede dar luces de además de tolerancia, de dependencia y adicción. Aunque es solo sugerencia, pues no se que tan relevante pueda ser …
SUBESCALA EVITACIÓN/MODERACIÓN	Ítem 1. Cuando no quiero consumir cocaína realizo otras actividades que disfruto como por ejemplo ir a comer, ir al cine, salir con personas que no consumen cocaína, etc.	Coherencia	4	4	4	4	4	4	0	4	Ítem 1. Cuando no quiero consumir cocaína realizo otras actividades que disfruto como por ejemplo ir a comer, ir al cine, salir con personas que no consumen cocaína, etc.	No se acepta sugerencia puesto que no incluíremos preguntas abiertas
		Relevancia	4	4	4	4	4	4	0	4
		Claridad	4	3	4	4	4	4	0.408248	3.83333
		Observación		Preguntar que si se hace detox, cómo se hace
	Ítem 2. Cuando no quiero consumir cocaína dirijo o pongo mi atención a otros aspectos importantes de mi vida como el trabajo, estudio, la familia o amigos.	Coherencia	4	3	4	4	4	4	0.408248	3.83333	Ítem 2. Cuando no quiero consumir cocaína dirijo o pongo mi atención a otros aspectos importantes de mi vida como el trabajo, estudio, la familia o amigos.
		Relevancia	4	3	4	4	4	4	0.408248	3.83333
		Claridad	4	3	4	4	4	4	0.408248	3.83333
		Observación		Es como si por consumir cocain a no l expresara atención a esos factores de trabajo, estudio y familia... se ma entiende
	Ítem 3. Cuando no quiero consumir cocaína, busco realizar actividades que me ayudan a manejar el deseo o la ansiedad, como hacer deporte o meditar.	Coherencia	4	4	4	4	4	4	0	4	Ítem 3. Cuando no quiero consumir cocaína, busco realizar actividades que me ayudan a manejar el deseo o la ansiedad, como hacer deporte o meditar.
		Relevancia	4	4	3	4	4	4	0.408248	3.83333
		Claridad	4	3	4	4	4	4	0.408248	3.83333
		Observación		lo dicho	Esta pregunta se relaciona con la anterior
	Ítem 4. Tengo disponible una dosis de reserva de cocaína, por ejemplo en mi billetera, cartera o en mi hogar.	Coherencia	4	3	4	4	4	4	0.408248	3.83333	Ítem 4. Tengo disponible una dosis de reserva de cocaína, por ejemplo en mi billetera, cartera o en mi hogar.
		Relevancia	4	3	4	4	4	4	0.408248	3.83333
		Claridad	4	4	4	4	4	4	0	4
		Observación		es muy interesante la pregunta.. siempre los periqueros tenemos ese medidor.. si usted es capaz de tener perico en su casa sin consumírsela, y eso es bien por que puede detener el consumo, porque se sabe medir, porque puede marcar los tiempos., pero tambien porque a la hora en que se antoje
	Ítem 5. Busco asesoría de un profesional de la salud (un psicólogo/a, médico/a o consejero/a en adicciones) si percibo efectos negativos por el consumo de cocaína, como incapacidad para moderar el consumo, problemas físicos, psicológicos o sociales.	Coherencia	4	4	4	4	4	4	0	4	Ítem 5. Busco asesoría de un profesional de la salud (un psicólogo/a, médico/a o consejero/a en adicciones) si percibo efectos negativos por el consumo de cocaína, como incapacidad para moderar el consumo, problemas físicos, psicológicos o sociales.
		Relevancia	4	4	4	4	4	4	0	4
		Claridad	3	3	4	4	4	4	0.516398	3.66667
		Observación	Requiere una opción si no percibe efectos negativos	o a quien mas acude..
	SUFICIENCIA SUBESCALA	Suficiencia	4	4	4	4	4	4	0	4
		Observación

## Sheet: Hoja 2
1
2
3
4
5
6
7
8
9
10
11
12
13
14
15
16
17
18
19
20
21
22
23
24
25
26
27
28
29
30
31
32
33
34
35
36
37
38
39
40
41
42
43
44
45
46
47
48
49
50
51
52
53
54
55
56
57
58
59
60
61
62
63
64
65
66
67
68
69
70
71
72
73
74
75
76
77
78
79
80
81
82
83
84
85
86
87
88
89
90
91
92
93
94
95
96
97
98
99
100
