# Supplementary material for: Development and Validation of a Spanish-Language Protective Behavioral Strategies Scale for People Who Snort Cocaine: Evidence from Mexico, Colombia, and Chile
Source: Research Square preprint supplement (doi:10.21203/rs.3.rs-7041559/v1), 2025-07-10
Supplement: Supplementary file 3 [file 5d06cde6391fc0e64e554155.xlsx]

## Sheet: Hoja 2
Consumo cocaína en ambientes seguros p.ej. en mi casa o en casa de mis amigos, en lugares destinados al consumo o en lugares tolerantes al consumo, acompañado de personas de confianza.
Me hidrato con suficiente agua
Consumo inicialmente una dosis baja de cocaína y en función de los efectos decido si quiero consumir más
Establezco una cantidad de cocaína límite para consumir en una sesión de consumo* y no la sobrepaso
La presión de los demas me hace consumir más cocaína de la que quiero
Consumo varías dosis en una sesión de consumo*
Reconozco los signos y sintomas de una sobredosis de cocaína
Sé como actuar frente a una sobredosis
Uso cocaína en compañía de personas que sabrían que hacer en caso de sobredosis
Prefiero vías de administración de menor riesgo, por ejemplo esnifada*
Evito el consumo de cocaína si tengo HIV
Evito el consumo de cocaína si me encuentro tomando medicamentos para el tratamiento de VIH
Evito el consumo de cocaína si tengo deficiencia de pseudocolinesterasa plasmática
Consumo cocaína solo si me estado físico es optimo
Consumo cocaína solo si mi estado de ánimo es optimo
Busco asesoría profesional si se percibo efectos adversos como tristeza profunda y constante, pérdida de interés por la vida, pensamientos suicidas
Consumo cocaína en ambientes seguros y libres de violencia, p.ej. en mi casa o en casa de mis amigos, en lugares destinados al consumo o en lugares tolerantes al consumo, acompañadx de personas de confianza.
He realizado actividades como conducir un vehiculo u operar una máquina, bajo los efectos de la cocaína
Me niego a subir en un vehículo que conduce alguien que ha estado usando drogas
Consumo habitualmente cocaína, con menos de tres semanas de diferencia entre una sesión de consumo* y la otra
Consumo cocaína solo si me estado físico es optimo
Evito el consumo de cocaína si tengo enfermedades cardiovasculares, renales, gastrointestinales, neuronales.
Detengo el consumo de cocaína si percibo efectos adversos en la salud física p.ej palpitaciones/arritmia, taquicardia, dolor y/o presión en el pecho, hipertensión, dolores de cabeza/ migraña, convulsiones, infecciones en la piel, sangrado nasal o daño en la mucosas nasales, soplo cardiaco, dificultad para respirar con cualquier actividad, etc.
Busco asesoría profesional si percibo efectos adversos en mi salud física p.ej palpitaciones/arritmia, taquicardia, dolor y/o presión en el pecho, hipertensión, dolores de cabeza/ migraña, convulsiones, infecciones en la piel, sangrado nasal o daño en la mucosas nasales, soplo cardiaco, dificultad para respirar con cualquier actividad, etc.
Consumo cocaína para realizar actividad física intensa
Evito el uso de cocaína durante el embarazo y la lactancia
Mezclo cocaína con otras sustancias
Prefiero las mezclas que sé que tiene un menor riesgo para mi salud
Conozco el contenido de la sustancia antes de consumirla / Hago uso de servicios de análisis de sustancias
Consumo inicialmente una dosis baja de cocaína (20-50mg) y en función de los efectos decido si quiero consumir más
Adquiero la sustancia de una fuente confiable p.ej. un vendedor al que frecuento o un amigo
Consumo cocaína aún cuando tengo conocimiento o sospecha de que está adulterada o sustituida
Hago uso de parafernalia* adecuada para el consumo de menor riesgo de cocaína como p.ej. pitillo/ popotes o tubos desechables o de vidrio
Comparto la parafernalia* con otras personas
Desinfecto con cloro la parafernalia* despues de cada sesión de consumo
Utilizo papeles, billetes, llaves, etc como instrumento para esnifar* cocaína
Utilizo preservativos y lubricantes durante las relaciones sexuales que tengo bajo los efectos de la cocaína
Prefiero vías de administración de menor riesgo, por ejemplo esnifada*
Prepararo adecuadamente la cocaína antes de consumirla, pulverizandola finamente
Alterno mis fosas al consumir cocaína
Limpio mis fosas nasales antes, durante y después el consumo
Humecto mis mucosas nasales con balsamo despues del cosnumo
Prefiero vías de administración de menor riesgo, por ejemplo esnifada*
He realizado actividades como conducir un vehiculo u operar una máquina, bajo los efectos de la cocaína
Consumo cocaína en ambientes seguros p.ej. en mi casa o en casa de mis amigos, en lugares destinados al consumo o en lugares tolerantes al consumo, acompañado de personas de confianza.
Consumo cocaína en compañia de personas en quien confío
No recibo cocaína de extraños
Consumo cocaína en ambientes seguros y libres de violencia, p.ej. en mi casa o en casa de mis amigos, en lugares destinados al consumo o en lugares tolerantes al consumo, acompañadx de personas de confianza.
Realizo transacciones de sexo por cocaína o por dinero para comprarla
Me alimento bien y descanso después de consumir cocaína.
Consumo habitualmente cocaína, con menos de tres semanas de diferencia entre una sesión de consumo y la otra
Tengo periodos de desintoxicación o abstinencia entre mis consumos
No permito que el consumo se convierta en el eje central de mi vida/ El consumo de cocaína es una de las cosas más importantes de mi vida
Detengo el consumo de cocaína si percibo que aparecen signos y síntomas del trastorno por consumo de cocaína como preocupación sobre el consumo, imposibilidad de dejar de consumir, tolerancia, abstinencia, craving, etc.
Busco asesoría profesional si percibo que aparecen signos y síntomas del trastorno por consumo de cocaína como preocupación sobre el consumo, imposibilidad de dejar de consumir, tolerancia, abstinencia, craving, etc.
Evitar el uso de cocaína para contrarrestar los efectos secundarios del uso anterior (síndrome de abstinencia)
Evitar el uso de cocaína si se tiene antecedentes familiares de trastorno por uso de sustancias
Prefiero vías de administración de menor riesgo, por ejemplo esnifada
Consumo cocaína solo si mi estado de animo es optimo
Busco asesoría profesional si percibo que aparecen signos y síntomas de otros trastornos mentales derivados del uso de cocaína como delirios, alucinaciones, depresión, manía, ansiedad, obsesividad, dificultad para dormir, pérdida de la libido o deseo sexual , etc.
Evito el consumo de cocaína si se tengo antecedentes de psicosis, trastorno bipolar, depresión, ansiedad, obsesividad, trastornos del sueño, trastornos sexuales o delirio.
Detengo el consumo de cocaína si percibo que aparecen signos y síntomas de otros trastornos derivados del uso de cocaína como delirios, alucinaciones, depresión, manía, ansiedad, obsesividad, dificultad para dormir, pérdida de la libido o deseo sexual , etc.
Evito el consumo de cocaína si tengo antecedente de otros trastornos mentales secundarios al uso de cocaína como trastornos de alimentación o trastorno por uso de otras sustancias.
Detener el consumo de cocaína si se evidencias signos y síntomas de otros trastornos mentales secundarios al uso de cocaína como trastornos de alimentación, disfunción sexual o trastorno por uso de otras sustancias.
Busco asesoría profesional si percibo que aparecen signos y síntomas de otros trastornos mentales secundarios al uso de cocaína como trastornos de alimentación, disfunción sexual o trastorno por uso de otras sustancias.
Evito el consumo de cocaína si me han diagnosticado algún trastorno por uso de otra sustancia psicoactiva
Consumo cocaína solo si mi estado de animo es optimo
El consumo de cocaína afecta mis finanzas personales
El consumo de cocaína me ha causado pérdidas materiales
He perdido mi trabajo por mi consumo de cocaína
He perdido mi hogar por mi consumo de cocaína
He abandonado mis estudios por mi consumo de cocaína
Busco asesoría profesional si mi consumo de cocaína me ocasiona pérdidas materiales, económicas, perdida del empleo, el hogar, deserción escolar.
Detengo el consumo de cocaína si mi consumo de cocaína me ocasiona pérdidas materiales, económicas, perdida del empleo, el hogar, deserción escolar.
El consumo de cocaína me ha hecho perder relaciones p.ej. de amistad o familiares
Busco asesoría profesional si mi consumo de cocaína me ocasiona pérdidas en relaciones personales p.ej. relaciones con la familia
Evito el uso de cocaína durante el embarazo y la lactancia
Continuo consumiendo cocaína aun cuando he percibido aumento de la agresividad, irritabilidad y violencia.
Me he involucrado en la comisión de delitos relacionados con la sustancia p.ej. fabricación, venta; o aquellos relacionados con conseguir la sustancia o dinero para comprarla p.ej. hurto
He cometido delitos violentos (lesiones personales, homicidio) mientras estoy bajo el efecto de la cocaína
He cometido otros delitos (vandalismo) mientras estoy bajo el efecto de la cocaína
El consumo de cocaína afecta mis relaciones familiares
He dejado de lado el cuidado de mis hijos por estar consumiendo cocaína o recuperandome del consumo
Detengo el consumo de cocaína si afecta mis relaciones familiares
Busco asesoría profesional si percibo afectación de mis relaciones familiares
