# Supplementary material for: Development and Validation of a Spanish-Language Protective Behavioral Strategies Scale for People Who Snort Cocaine: Evidence from Mexico, Colombia, and Chile
Source: Research Square preprint supplement (doi:10.21203/rs.3.rs-7041559/v1), 2025-07-10
Supplement: Supplementary file 5 [file de1bfc89ab877be40f78dfda.xlsx]

## Sheet: Hoja 1
Estrategias iniciales	59
Estrategias reportada por al menos un usuario	48
Estrategia reportada por más de tres usuarios	24
Estrategia reportada por más de tres usuarios pero sin evidencia científica	1
Estrategia reportada por al menos un usuario y que los investigadores consideramos pertinente	6
Dos o más estrategias que fueron agrupadas en una por considerar que median una misma cosa	7
Estrategia eliminada por considerarse ineficaz por al menos 3 usuarios	11
Estrategia que se dividió en dos o más estrategias por considerarse que medía aspectos diferentes	3
Estrategias de reducción de riesgos y daños		E1UCHR	E2UC	E3UC	E4UC	E5UC	E6UC	E7UC	E8UC	E9UC	E10UC
Evitación selectiva		E1UCHR	E2UC	E3UC	E4UC	E5UC	E6UC	E7UC	E8UC	E9UC	E10UC
Evitar consumir cocaína si físicamente no me siento bien o si atravieso el curso de una enfermedad
Evitar consumir cocaína si anímicamente no me siento bien o si atravieso el curso de una enfermedad mental
Evitar consumir cocaína cuando estoy en un tratamiento con medicamentos
Evitar consumir cocaína solo					x	x				x
Evitar consumir cocaína previo a un evento importante (p.ej. un examen o una entrevista de trabajo, una competencia de deporte)		x	x			x				x	x
Consumo cocaína en compañía de desconocidos
Evitar consumir cocaína cuando tengo conocimiento o sospecha de que no es de buena calidad o está sustituida con otra/s sustancia/s
Evitar recibirle cocaína a extraños				x	x	x	x	x		x
Evitar consumir cocaína si he consumido una cantidad significativa de otra sustancia previamente p.ej. si estoy muy embriagado con alcohol o he consumido otros estimulantes		x			x		x
Evitar que la presión de los demás me haga consumir más cocaína de la que quiero
Detener el consumo de cocaína si percibo efectos adversos inmediatos p.ej ansiedad, palpitaciones/arritmia, taquicardia, dolor y/o presión en el pecho, hipertensión, dolor de cabeza/ migraña, convulsiones, sangrado nasal, dificultad para respirar, etc.
Detener o moderar el consumo si hubo un evento adverso como crisis de ansiedad (malviaje) o sobredosis				x	x		x
Detener el consumo de cocaína si percibo que exacerba en mi una conducta agresiva o violenta
Detener el consumo si se presenta algún conflicto con la ley p.ej una riña		x			x		x		x
Detener el consumo si se presenta un evento adverso con alguien más p.ej. un mal viaje, una sobredosis					x	x			x
Detener o moderar el consumo de cocaína si percibo efectos adversos en mi salud física p.ej la aparición de lesiones permanentes o enfermedades cardiovasculares, neurológicas, renales, etc.
Detener o moderar el consumo de cocaína si percibo efectos adversos en mi salud mental p.ej el desarrollo de trastornos del sueño, adicción, trastornos de la conducta alimentaria, psicosis, ansiedad, depresión
Detener o moderar el consumo de cocaína si percibo que me genera pérdidas materiales p.ej. por la venta de mis pertenencias
Detener o moderar el consumo de cocaína si percibo que afecta mis finanzas personales por el gasto excesivo de dinero en la sustancia
Detener o moderar el consumo de cocaína si percibo que afecta mis desempeño y estabilidad laboral o académica
Detener o moderar el consumo de cocaína si percibo que afecta mis relaciones interpersonales (con familiares o amigos)
Detener o moderar el consumo de cocaína si percibo que afecta mis estabilidad de vivienda p.ej. si mi familia me pide que me vaya de la casa o si ya no tengo dinero para pagar un lugar donde vivir
Detener o moderar el consumo de cocaína si percibo que me hace ser negligente con mis hijos
Detener o moderar el consumo de cocaína si percibo que se ha vuelto el eje central de mi vida
Evitar consumir cocaína en espacios familiares o laborales		x			x
Evitar consumir cocaína si estoy a cargo de otras personas			x
Evitar consumir cocaína para aumentar el rendimiento físico, haciendo deporte					x
Evitar consumir si tiene antecedentes familiares de enfermedades físicas y mentales que lo hagan más vulnerable a la cocaína				x
Detener el consumo de cocaína si mi familia me lo solicita			x
Moderar el consumo conforme avanza en edad					x
Detener el consumo si alguien cercano sufre consecuencias mayores como una muerte por sobredosis									x
Detener el consumo de cocaína si sufro algún accidente			x
Detener el consumo si cambia el ambiente											x
Estrategias de evitación o alternativas al consumo		E1UCHR	E2UC	E3UC	E4UC	E5UC	E6UC	E7UC	E8UC	E9UC	E10UC
Cuando no quiero consumir cocaína busco realizar otras actividades que disfruto p.ej. ir a comer, ir al cine, salir con amigos que no consumen cocaína, etc.
Cuando no quiero consumir cocaína focalizo mi atención en otros aspectos importantes de mi vida como el trabajo/ estudio						x		x		x
Cuando no quiero consumir cocaína busco realizar actividades que me ayudan a manejar el deseo de consumir como hacer deporte o meditar										x
Buscar asesoría profesional si se percibo efectos adversos por el consumo de cocaína p.ej. incapacidad para moderar el consumo, problemas físicos, problemas sociales (familiares, laborales/académicos, económicos, legales)
Sustituir por una sustancia de menor riesgo (cannabis para el bajón, estimulantes más leves como cafeína, alcohol para desinhibición y relajación, benzodiacepinas para abstinencia clona/diazepam)	No hay evidencia de que reduzca el riesgo		x					x	x	x
Evitar tener disponible cocaína (por ejemplo en la casa)								x
Apoyarse en amigos o familia si percibo efectos adversos por el consumo de cocaína p.ej. incapacidad para moderar el consumo, problemas físicos, problemas sociales (familiares, laborales/académicos, económicos, legales)								x
Preparación para consumo de cocaína (antes)	Conclusiones	E1UCHR	E2UC	E3UC	E4UC	E5UC	E6UC	E7UC	E8UC	E9UC	E10UC
Consultar fuentes confiables de información para conocer la cocaína (efectos, dosis, riesgos)	Consultar fuentes confiables para tener información sobre la cocaína (artículos, libros, podcast, organizaciones de la sociedad civil)				x
Consultar fuentes confiables de información para conocer cómo reducir los daños si decido usar cocaína
Consultar fuentes confiables de información para conocer el mercado de cocaína del lugar en el que estoy (alertas sobre posibles adulterantes o sustituyentes en la cocaína que se vende en la zona)
Establecer una cantidad de cocaína límite para consumir durante el mes y no sobrepasarla	A menos de que el consumo sea diario esta estrategia es ineficaz
Establecer una cantidad de dinero para gastar en cocaína en un mes y no sobrepasarla
Establecer un tiempo mínimo que debe pasar entre una sesión de consumo y la otra y respetarlo p.ej. decir "no voy a consumir hasta dentro de un mes/seis meses" y cumplirlo
Planear la sesión de consumo p. ej. estableciendo una hora de inicio y fin de consumo, una cantidad, un lugar en donde consumir y las personas con quien hacerlo		x	x	x				x		x	x
Alimentarse bien antes de consumir cocaína		x	x		x		x	x	x
Almacenar la sustancia en un lugar adecuado para evitar problemas con los demás (por ejemplo la familia o la policía)					x		x	x
Realizar ejercicio físico								x
Asegurarme de cubrir las necesidades básicas de la vida, antes de destinar dinero a la cocaína									x
Evaluar constantemente la salud física									x
Dormir bien, descansar bien antes de una ocasión de consumo							x	x
Hidratarse antes de una ocasión de consumo							x	x
Calidad de la sustancia		E1UCHR	E2UC	E3UC	E4UC	E5UC	E6UC	E7UC	E8UC	E9UC	E10UC
Comprar con anterioridad la sustancia, no comprar el lugar				x		x	x		x
Adquirir (comprar) la cocaína de una fuente confiable p.ej. un vendedor/a al que frecuento o un amigo/a o conocido/a
Examinar el contenido/ la pureza de la sustancia antes de consumirla p.ej. por su aspecto, olor, sabor, efecto de una pequeña cantidad sobre la lengua o haciendo uso de servicios de análisis de sustancias	Esta se dividió en dos puesto que los servicios son una forma confiable mientras que la otra no. Es preferible poner la opcion de NA porque no hay servicios disponibles
Hacer uso de servicios de análisis de sustancias (incluir la opción No hay disponibles)
Testear la sustancia con reactivos propios (mandelin)								x
Solo recibirle cocaína a un conocidos							x			x
Indagar sobre la fuente de donde se adquirió la sustancia si me la ofrece otra persona						x
Durante el consumo de cocaína		E1UCHR	E2UC	E3UC	E4UC	E5UC	E6UC	E7UC	E8UC	E9UC	E10UC
Promover una cultura de cuidado colectivo entre las personas que suelen consumir conmigo		x		x		x	x	x	x	x	x
Consumir cocaína en ambientes seguros p.ej. en una casa o en lugares tolerantes al consumo como ciertos bares o festivales	Consumo cocaína en ambientes que considero seguros p.ej. en una casa								x
Consumir cocaína en ambientes físicamente seguros para evitar golpes y caídas				x			x		x
Consumir cocaína en compañía de personas en quien confío, no con desconocidos	Consumo cocaína en compañía de personas en quien confío Consumo cocaína en compañía de desconocidos
Consumir cocaína en compañía de personas que sabrían qué hacer en caso de sobredosis
No realizar actividades como conducir un vehículo u operar una máquina, bajo los efectos de la cocaína
Negarse a subir en un vehículo que conduce alguien que ha estado usando drogas
Tomar un transporte seguro, no tomarlo en la calle, informar a alguien sobre el servicio que uno tomó			x		x	x	x		x
Tener el celular siempre con suficiente carga/ batería					x
Entregar el dinero a otra persona para no comprar más cocaína			x
Asegurarme de tener en un lugar seguro mis pertenencias			x	x
No hacer actividad física de riesgo (correr o saltar grandes distancias), ni muy exigente bajo el efecto de la cocaína					x	x
Vía de administración		E1UCHR	E2UC	E3UC	E4UC	E5UC	E6UC	E7UC	E8UC	E9UC	E10UC
Preferir vías de administración de menor riesgo, por ejemplo esnifada* (intranasal)	Se pregunta en otro cuestionario
Evitar usar directamente de la bolsa										x
Pulverizar finamente la cocaína antes de consumirla
Limpiar la nariz varias veces durante el consumo				x						x
Utilizar parafernalia o instrumentos adecuados para tener un consumo de menor riesgo de cocaína como p.ej. tubos de vidrio
Utilizar parafernalia o instrumentos adecuados para tener un consumo de menor riesgo de cocaína como p.ej. pitillos/popotes/sorbetes/ tubos desechables
Calentar las fosas para evitar el dolor y ardor al esnifar			x
Alternar mis fosas al aspirar cocaina
Usar las dos fosas nasales en una misma dosis										x
Evitar utilizar papeles o billetes como instrumentos para aspirar cocaína
Evitar compartir los instrumentos que uso para aspirar cocaína con otras personas
Desinfectar la parafernalia con alcohol o cloro antes de usarla		x		x	x	x	x	x	x		x
Desechar instrumentos (papeles, pitillos/popotes) cada cierto uso								x		x
Tener un kit necesario (agua para limpiar la nariz, teléfonos anotados por si se pierde el celular)									x
Sobre la dosificación		E1UCHR	E2UC	E3UC	E4UC	E5UC	E6UC	E7UC	E8UC	E9UC	E10UC
Evitar consumir varias dosis (líneas, grapas) de cocaína en una misma ocasión de consumo	Se considera ineficaz, todos prefieren varias dosis pequeñas.
Establecer una cantidad de cocaína límite para consumir en una ocasión y no sobrepasarla
Consumir inicialmente una dosis baja de cocaína y en función de los efectos decidir si quiero consumir más
Establecer una cantidad de dinero para gastar en cocaína en una ocasión de consumo y no sobrepasarla
Dejar pasar una hora entre una dosis y la siguiente		x			x			x		x	x
Cuidar la dosis después de un periodo de desintoxicación									x
Sobre las mezclas		E1UCHR	E2UC	E3UC	E4UC	E5UC	E6UC	E7UC	E8UC	E9UC	E10UC
Evitar consumir otras sustancias al mismo tiempo con la cocaína p.ej alcohol, tabaco, marihuana, éxtasis, etc
Preferir mezclas que impliquen un riesgo bajo		x				x			x	x
Moderar la dosis si se está mezclando con otra sustancia				x		x	x	x	x	x
Sobre los posibles efectos adversos		E1UCHR	E2UC	E3UC	E4UC	E5UC	E6UC	E7UC	E8UC	E9UC	E10UC
Vigilar los signos vitales					x
Mantenerse hidratado con suficiente agua
Comer chicle o dulces para evitar bruxismo			x		x			x
No tener muchos proveedores de cocaína disponibles										x
Hacer ejercicios de respiración para manejar estados de demasiada estimulación, excitación y ansiedad (mal viaje)									x	x	x
Buscar atención médica si aparecen signos y síntomas adversos								x	x		x
Humectar la boca con líquidos o dulces									x
Comer algo para bajar el mal viaje								x
Comer algo dulce para evitar sobredosis	No hay evidencia de que reduzca el riesgo		x
Utilizar estrategias de distracción para evitar consumir más de lo deseado							x
Apartarse a un lugar tranquilo y oscuro para manejar la intoxicación (mal viaje)									x	x
Darme una ducha para manejar la intoxicación (mal viaje)										x
Mantener la calma en caso de ansiedad											x
Evitar consumir marihuana para bajar los efectos											x
Habilidades de resistencia/ autocontrol para no recibir											x
Sobre los riesgos sexuales		E1UCHR	E2UC	E3UC	E4UC	E5UC	E6UC	E7UC	E8UC	E9UC	E10UC
Tener disponible preservativos, almacenarlos en un lugar seguro				x	x				x
Utilizar preservativos durante las relaciones sexuales que tengo bajo los efectos de la cocaína
Solo tener relaciones consensuadas, aceptar que en cualquier momento alguna de las partes puede decir que no		x						x
Sobre los problemas legales		E1UCHR	E2UC	E3UC	E4UC	E5UC	E6UC	E7UC	E8UC	E9UC	E10UC
Portar cantidades de cocaína dentro de los límites legales
Evitar involucrarse en peleas bajo el efecto de la cocaína
Evitar compartir u ofrecer cocaína a otras personas		x								x
Evitar vender cocaína u otras sustancias para costear mi consumo de cocaína
Evitar hurtar para costear mi consumo de cocaína
Evitar lastimar a otras personas mientras estoy bajo el efecto de la cocaína p.ej. porque me pongo violento, no controlo mi conducta y agredo a terceros
Evitar dañar bienes ajenos mientras estoy bajo el efecto de la cocaína p.ej. porque me pongo violento, no controlo mi conducta y hago daños
Evitar abandonar el cuidado de mis hijos por estar consumiendo cocaína o recuperándome del consumo
Evitar realizar transacciones de sexo por cocaína o por dinero para comprarla
Después del consumo de cocaína		E1UCHR	E2UC	E3UC	E4UC	E5UC	E6UC	E7UC	E8UC	E9UC	E10UC
Limpiar mis fosas nasales con agua o suero después de una ocasión de consumo
Humectar las mucosas nasales bálsamo o crema después del consumo
Desinfectar con cloro la parafernalia* después de cada sesión de consumo	Se considera ineficaz hacerlos después
Descansar lo suficiente (al menos 8 horas) después de consumir cocaína
Alimentarse bien después de consumir cocaína
Hidratarse con suficiente agua		x			x		x		x	x
Arreglar el entorno amable y hacer actividades que disfruta para contrarrestar el bajón			x				x	x
Atender las consecuencias si se expuso a una situación de riesgo (golpes, lesiones, relaciones sexuales), ir al médico (hablar con sinceridad de lo que pasó)		x							x
Tener periodos de desintoxicación o abstinencia entre una ocasión de consumo y otra (de al menos tres semanas)
No consumir cocaína para contrarrestar los efectos secundarios del uso anterior (el síndrome de abstinencia o bajón)
Esperar a que se bajen los efectos antes de manejar	No hay evidencia de que reduzca el riesgo	x
Para manejar la inapetencia empezar por comer cosas pequeñas, ligeras			x						x
Hacer ejercicios de respiración/meditación para controlar el ritmo cardiaco o darse una ducha para esperar mientras se bajar el efecto			x						x
Crear un ambiente amigable, hacer cosas que agraden, ocuparse (para manejar el bajón)										x
Acomodarse en un lugar seguro y tranquilo para descansar y relajarse			x						x	x
Darse una ducha para contrarrestar mucha fatiga y el bajón			x							x
Comer caramelos para contrarrestar el sabor amargo que queda de la cocaína y así poder recuperar la apendencia			x
Deshacerse de la parafernalia para evitar problemas sociales (familia, policía)				x
Hacer ejercicio				x
