# Supplementary material for: Development and Validation of a Spanish-Language Protective Behavioral Strategies Scale for People Who Snort Cocaine: Evidence from Mexico, Colombia, and Chile
Source: Research Square preprint supplement (doi:10.21203/rs.3.rs-7041559/v1), 2025-07-10
Supplement: Supplementary file 6 [file f89465f0b3d61e601ef34cd7.docx]

**Validación ususarios cocaína**

**Flujo de encuesta**

**Standard: CONSENTIMIENTO (1 Question)**

**Standard: INCLUSIÓN (3 Questions)**

**Standard: SOCIODEMOGRÁFICOS (6 Questions)**

**Standard: CONSUMO COCAÍNA (9 Questions)**

**Block: ANTES (11 Questions)**

**Standard: DURANTE (33 Questions)**

**Standard: DESPUÉS (11 Questions)**

**Standard: MODERACIÓN/EVITACIÓN (6 Questions)**

**Standard: CONSECUENCIAS (4 Questions)**

| Salto de página |  |
| --- | --- |

**Comienzo de bloque: CONSENTIMIENTO**

| 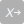 |
| --- |

Q1
**Consentimiento informado
Estudio sobre prácticas asociadas al consumo de cocaína**
El propósito de este estudio es conocer las prácticas asociadas el consumo de cocaína y las consecuencias derivadas de este. Para esto lo(a) invitamos a responder esta encuesta con la mayor sinceridad posible, teniendo en cuenta que no existen respuestas correctas o incorrectas y que en ningún momento le pediremos sus datos de identificación (sus respuestas serán anónimas). Usted no está obligado a responder estas preguntas, si así lo desea podrá retirarse del estudio en cualquier momento.

Si decide participar en el estudio, diligenciar esta encuesta puede tomarle aproximadamente 30 minutos, no podrá resolverla de forma parcial, puesto que los resultados no serán guardados, por esta razón le pedimos que únicamente inicie la evaluación si cuenta con suficiente tiempo disponible.

Esta investigación está a cargo de Adriana Carolina Pinzón Gómez, candidata a doctorado en psicología de la Universidad de los Andes, asesorada por la Dra. Clara Fleiz Bautista, investigadora en Ciencias Médicas del Instituto Nacional de Psiquiatría Ramón de la Fuente Muñiz (México) y dirigida por el Dr. Carlos Gantiva, profesor asociado del Departamento de Psicología de la Universidad de los Andes. Si quisiera tener más información acerca de esta investigación puede comunicarse con la investigadora al correo ac.pinzon410@uniandes.edu.co

Esta investigación fue aprobada por el comité de ética de la Facultad de Ciencias Sociales de la Universidad de los Andes, en caso de tener alguna inquietud puede comunicarse al teléfono 3394949 ext: 5552 (Bogotá, Colombia) o el correo electrónico: etica.faciso@uniandes.edu.co Por favor responda estas preguntas para saber si usted es elegible para este estudio:

- He leído el consentimiento y **ACEPTO** participar (1)
- He leído el consentimiento y **NO ACEPTO** participar (2)

*Saltar a: Fin de la encuesta Si Consentimiento = He leído el consentimiento y <strong>NO ACEPTO</strong> participar*

**Fin del bloque: CONSENTIMIENTO**

**Comienzo de bloque: INCLUSIÓN**

MAYOR DE EDAD Este estudio está dirigido a personas mayores de 18 años ¿Tiene usted 18 años o más?

- Sí (1)
- No (2)

*Saltar a: Fin de la encuesta Si Este estudio está dirigido a personas mayores de 18 años ¿Tiene usted 18 años o más? = No*

COCAÍNA ULTIMO AÑO ¿Ha consumido cocaína en el último año?

- Sí (1)
- No (2)

*Saltar a: Fin de la encuesta Si ¿Ha consumido cocaína en el último año? = No*

VÍA DE ADMINISTRACIÓ ¿De qué forma(s) consume cocaína actualmente?

*Saltar a: Fin de la encuesta Si ¿De qué forma(s) consume cocaína actualmente? != Aspirada/ esnifada (intranasal)*

**Fin del bloque: INCLUSIÓN**

**Comienzo de bloque: SOCIODEMOGRÁFICOS**

PROCEDENCIA ¿En qué país nació?

▼ Argentina (1) ... Otro (19)

GÉNERO ¿Con qué género se identifica?

▼ Femenino (mujer) (1) ... Prefiero no responder (7)

ORIENTACIÓN SEXUAL ¿Cuál es su orientación sexual?

▼ Heterosexual (1) ... Prefiero no responder (6)

RAZA ¿Con qué raza se identifica?

▼ Afrodescendiente (1) ... Prefiero no responder (6)

EDUCACIÓN ¿Cuál es su máximo nivel de educación finalizado?

▼ Ninguno (1) ... Posgrado (8)

NIVEL SOCIOECONÓMICO En una escala de 1 a 10, siendo 1 la peor situación, donde las personas tienen menos dinero, menos educación y los peores puestos de trabajo o no tienen trabajo, y 10 la mejor situación, donde las personas tienen la mayor cantidad de dinero, la mejor educación, y los mejores puestos de trabajo ¿En qué posición considera que está ubicado/a?

|  | 0 | 1 | 3 | 4 | 5 | 6 | 8 | 9 | 10 |
| --- | --- | --- | --- | --- | --- | --- | --- | --- | --- |

| . () | 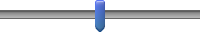 |
| --- | --- |

**Fin del bloque: SOCIODEMOGRÁFICOS**

**Comienzo de bloque: CONSUMO COCAÍNA**

0 En este apartado le pedimos que por favor nos deje conocer un poco más acerca de su consumo de cocaína.

INICIO CONSUMO ¿Cuántos años tenía cuando consumió cocaína por primera vez?

▼ 1 (1) ... 100 (100)

TIEMPO CONSUMO ¿Durante cuánto tiempo ha consumido cocaína?

- Menos de 1 año (1)
- Entre 1 año 3 años (2)
- Entre 4 años y 6 años (3)
- Más de 6 años (4)

CONSUMO 3 MESES En los últimos tres meses, ¿con qué frecuencia ha consumido cocaína?

|  | Nunca | Una o dos veces | Mensual- mente | Semanal- mente | Todos los días |
| --- | --- | --- | --- | --- | --- |

| Cocaína (coca, crack, etc.) () | 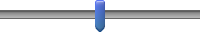 |
| --- | --- |

FRECUENCIA ANSIA En los últimos tres meses, ¿con qué frecuencia ha sentido un fuerte deseo o ansias de consumir cocaína ?

|  | Nunca | Una o dos veces | Mensual- mente | Semanal- mente | Todos los días |
| --- | --- | --- | --- | --- | --- |

| . () | 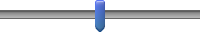 |
| --- | --- |

CANTIDAD COCAÍNA En una ocasión de consumo (p.ej. fiesta) ¿qué cantidad total de cocaína consume?

- 0.2 gramos (1)
- 0.5 gramos (2)
- 1 gramo (3)
- 2 gramos (4)
- Más de 2 gramos (5)
- No tengo clara la cantidad (6)

DOSIS SESIÓN En una ocasión de consumo (p.ej. fiesta) ¿cuántas dosis (líneas, grapas, aspiradas) de cocaína consume?

▼ 1 (1) ... 20 (20)

MEZCLAS ¿Con qué sustancias ha combinado/mezclado la cocaína? (puede seleccionar varias opciones)

- Tabaco (cigarrillos, tabaco de mascar, puros, etc.) (1)
- Bebidas alcohólicas (cerveza, vinos, licores, etc.) (2)
- Cannabis (marihuana, mota, hierba, hachís, etc.) (3)
- Estimulantes de tipo anfetamina (speed, anfetaminas, éxtasis, etc.) (4)
- Inhalantes (óxido nitroso, pegamento, gasolina, solvente para pintura, etc.) (5)
- Sedantes o pastillas para dormir (diazepam, alprazolam, flunitrazepam, midazolam, etc.) (6)
- Alucinógenos (LSD, ácidos, hongos, ketamina, etc.) (7)
- Opiáceos (heroína, morfina, metadona, buprenorfina, codeína, etc.) (8)
- Ninguna (9)

SOBREDOSIS ¿Cuántas veces ha sufrido sobredosis con cocaína?

- Ninguna (1)
- 1 vez (2)
- 2 veces (3)
- Más de 2 veces (4)

**Fin del bloque: CONSUMO COCAÍNA**

**Comienzo de bloque: ANTES**

0 En este apartado le pediremos que califique de 1 a 5 siendo 1 nunca y 5 siempre, en el último año, ¿con qué frecuencia han ocurrido estas conductas **antes del consumo de cocaína**?

A1 Planeo mi consumo, determinando las condiciones bajo las que voy a consumir.

|  | Nunca | Algunas veces | Siempre |
| --- | --- | --- | --- |

|  | 1 | 2 | 3 | 4 | 5 |
| --- | --- | --- | --- | --- | --- |

| 1 () | 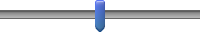 |
| --- | --- |

A2 Consumo cocaína cuando siento malestar físico (dolor corporal, cansancio) o durante el curso de una enfermedad.

|  | Nunca | Algunas veces | Siempre |
| --- | --- | --- | --- |

|  | 1 | 2 | 3 | 4 | 5 |
| --- | --- | --- | --- | --- | --- |

| 1 () | 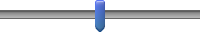 |
| --- | --- |

A3 Consumo cocaína cuando siento malestar emocional (tristeza, ansiedad, etc)

|  | Nunca | Algunas veces | Siempre |
| --- | --- | --- | --- |

|  | 1 | 2 | 3 | 4 | 5 |
| --- | --- | --- | --- | --- | --- |

| 1 () | 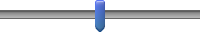 |
| --- | --- |

A4 Consumo cocaína antes de un evento importante (p.ej. un examen, una entrevista de trabajo o una competencia deportiva).

|  | Nunca | Algunas veces | Siempre |
| --- | --- | --- | --- |

|  | 1 | 2 | 3 | 4 | 5 |
| --- | --- | --- | --- | --- | --- |

| 1 () | 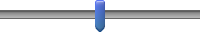 |
| --- | --- |

A5 Me alimento antes de una ocasión de consumo de cocaína.

|  | Nunca | Algunas veces | Siempre |
| --- | --- | --- | --- |

|  | 1 | 2 | 3 | 4 | 5 |
| --- | --- | --- | --- | --- | --- |

| 1 () | 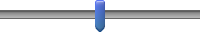 |
| --- | --- |

A6 Adquiero con anterioridad la sustancia y no en la fiesta, el festival o en la calle.

|  | Nunca | Algunas veces | Siempre |
| --- | --- | --- | --- |

|  | 1 | 2 | 3 | 4 | 5 |
| --- | --- | --- | --- | --- | --- |

| 1 () | 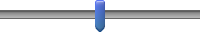 |
| --- | --- |

A7 Adquiero la cocaína de una fuente confiable, por ejemplo un vendedor(a) al que frecuento o un amigo(a) o conocido(a).

|  | Nunca | Algunas veces | Siempre |
| --- | --- | --- | --- |

|  | 1 | 2 | 3 | 4 | 5 |
| --- | --- | --- | --- | --- | --- |

| 1 () | 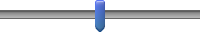 |
| --- | --- |

A8 Evalúo/checo/verifico la calidad o pureza de la cocaína antes de consumirla, por ejemplo por su aspecto, olor, sabor, efecto de una pequeña cantidad sobre la lengua o haciendo uso de pruebas de detección de cocaína o servicios de análisis de sustancias.

|  | Nunca | Algunas veces | Siempre |
| --- | --- | --- | --- |

|  | 1 | 2 | 3 | 4 | 5 |
| --- | --- | --- | --- | --- | --- |

| 1 () | 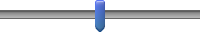 |
| --- | --- |

A9 Tengo varios proveedores de cocaína disponibles.

|  | Nunca | Algunas veces | Siempre |
| --- | --- | --- | --- |

|  | 1 | 2 | 3 | 4 | 5 |
| --- | --- | --- | --- | --- | --- |

| 1 () | 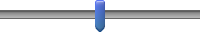 |
| --- | --- |

A10 Guardo la cocaína y los instrumentos que uso para consumirla en un lugar adecuado para evitar problemas con otras personas, por ejemplo con la policía o mi familia.

|  | Nunca | Algunas veces | Siempre |
| --- | --- | --- | --- |

|  | 1 | 2 | 3 | 4 | 5 |
| --- | --- | --- | --- | --- | --- |

| 1 () | 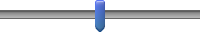 |
| --- | --- |

**Fin del bloque: ANTES**

**Comienzo de bloque: DURANTE**

0 En este apartado le pediremos que califique de 1 a 5 siendo 1 nunca y 5 siempre, en el último año, ¿con qué frecuencia han ocurrido estas conductas **durante el consumo de cocaína**?

B1 Consumo cocaína solo(a).

|  | Nunca | Algunas veces | Siempre |
| --- | --- | --- | --- |

|  | 1 | 2 | 3 | 4 | 5 |
| --- | --- | --- | --- | --- | --- |

| 1 () | 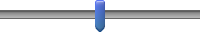 |
| --- | --- |

B2 Consumo cocaína en compañía de personas en quien(es) confío.

|  | Nunca | Algunas veces | Siempre |
| --- | --- | --- | --- |

|  | 1 | 2 | 3 | 4 | 5 |
| --- | --- | --- | --- | --- | --- |

| 1 () | 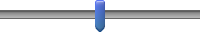 |
| --- | --- |

B3 Consumo cocaína en ambientes que considero seguros, por ejemplo en una casa.

|  | Nunca | Algunas veces | Siempre |
| --- | --- | --- | --- |

|  | 1 | 2 | 3 | 4 | 5 |
| --- | --- | --- | --- | --- | --- |

| 1 () | 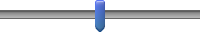 |
| --- | --- |

B4 Consumo cocaína aunque sospeche o sepa que está adulterada o es de mala calidad.

|  | Nunca | Algunas veces | Siempre |
| --- | --- | --- | --- |

|  | 1 | 2 | 3 | 4 | 5 |
| --- | --- | --- | --- | --- | --- |

| 1 () | 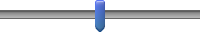 |
| --- | --- |

B5 Utilizo pitillos/popotes desechables para aspirar cocaína.

|  | Nunca | Algunas veces | Siempre |
| --- | --- | --- | --- |

|  | 1 | 2 | 3 | 4 | 5 |
| --- | --- | --- | --- | --- | --- |

| 1 () | 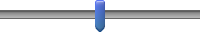 |
| --- | --- |

B6 Utilizo billetes como instrumentos para aspirar cocaína.

|  | Nunca | Algunas veces | Siempre |
| --- | --- | --- | --- |

|  | 1 | 2 | 3 | 4 | 5 |
| --- | --- | --- | --- | --- | --- |

| 1 () | 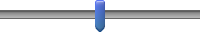 |
| --- | --- |

B7 Antes de consumir desinfecto con alcohol o cloro los instrumentos (tarjetas, cucharas o llaves) que voy a usar para el consumo.

|  | Nunca | Algunas veces | Siempre |
| --- | --- | --- | --- |

|  | 1 | 2 | 3 | 4 | 5 |
| --- | --- | --- | --- | --- | --- |

| 1 () | 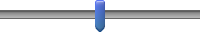 |
| --- | --- |

B8 Deshago los pedazos grandes de cocaína pulverizándolos, picándolos o triturándolos.

|  | Nunca | Algunas veces | Siempre |
| --- | --- | --- | --- |

|  | 1 | 2 | 3 | 4 | 5 |
| --- | --- | --- | --- | --- | --- |

| 1 () | 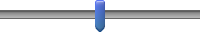 |
| --- | --- |

B9 Alterno mis fosas nasales al aspirar cocaína, es decir, aspiro cocaína primero por una fosa nasal y luego por la otra.

|  | Nunca | Algunas veces | Siempre |
| --- | --- | --- | --- |

|  | 1 | 2 | 3 | 4 | 5 |
| --- | --- | --- | --- | --- | --- |

| 1 () | 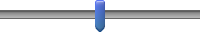 |
| --- | --- |

B10 Comparto con otras personas los instrumentos que uso para consumir cocaína, por ejemplo tubos, tarjetas, cucharas o llaves.

|  | Nunca | Algunas veces | Siempre |
| --- | --- | --- | --- |

|  | 1 | 2 | 3 | 4 | 5 |
| --- | --- | --- | --- | --- | --- |

| 1 () | 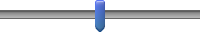 |
| --- | --- |

B11 En cada ocasión de consumo, establezco una cantidad de cocaína límite para consumir y no la sobrepaso.

|  | Nunca | Algunas veces | Siempre |
| --- | --- | --- | --- |

|  | 1 | 2 | 3 | 4 | 5 |
| --- | --- | --- | --- | --- | --- |

| 1 () | 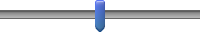 |
| --- | --- |

B12 En cada ocasión de consumo, establezco una cantidad de dinero para gastar en cocaína y no la sobrepaso.

|  | Nunca | Algunas veces | Siempre |
| --- | --- | --- | --- |

|  | 1 | 2 | 3 | 4 | 5 |
| --- | --- | --- | --- | --- | --- |

| 1 () | 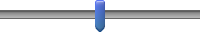 |
| --- | --- |

B13 Después de un tiempo sin consumir cocaína, si decido que quiero volver a consumir, reduzco la cantidad.

|  | Nunca | Algunas veces | Siempre |
| --- | --- | --- | --- |

|  | 1 | 2 | 3 | 4 | 5 |
| --- | --- | --- | --- | --- | --- |

| 1 () | 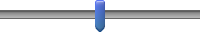 |
| --- | --- |

B14 Inicio con una dosis baja de cocaína y dependiendo de como me siento decido si quiero consumir más.

|  | Nunca | Algunas veces | Siempre |
| --- | --- | --- | --- |

|  | 1 | 2 | 3 | 4 | 5 |
| --- | --- | --- | --- | --- | --- |

| 14 () | 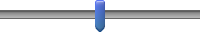 |
| --- | --- |

B15 Dejo pasar al menos una hora entre una dosis (pase, línea, grapa) y la siguiente.

|  | Nunca | Algunas veces | Siempre |
| --- | --- | --- | --- |

|  | 1 | 2 | 3 | 4 | 5 |
| --- | --- | --- | --- | --- | --- |

| 1 () | 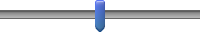 |
| --- | --- |

B16 Cuando estoy sudando excesivamente por consumir cocaína, me muevo a un lugar más ventilado.

|  | Nunca | Siempre | No he experimentado esos efectos |
| --- | --- | --- | --- |

|  | 1 | 2 | 3 | 4 | 5 |
| --- | --- | --- | --- | --- | --- |

| 1 () | 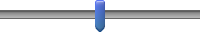 |
| --- | --- |

B17 Cuando siento que mi corazón late rápidamente por consumir cocaína, me retiro a descansar al menos por un momento.

|  | Nunca | Siempre | No he experimentado esos efectos |
| --- | --- | --- | --- |

|  | 1 | 2 | 3 | 4 | 5 |
| --- | --- | --- | --- | --- | --- |

| 1 () | 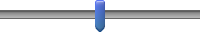 |
| --- | --- |

B18 Consumo cocaína que me ofrecen o regalan otras personas.

|  | Nunca | Algunas veces | Siempre |
| --- | --- | --- | --- |

|  | 1 | 2 | 3 | 4 | 5 |
| --- | --- | --- | --- | --- | --- |

| 1 () | 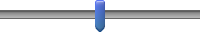 |
| --- | --- |

B19 Consumo cocaína cuando otros me presionan.

|  | Nunca | Algunas veces | Siempre |
| --- | --- | --- | --- |

|  | 1 | 2 | 3 | 4 | 5 |
| --- | --- | --- | --- | --- | --- |

| 1 () | 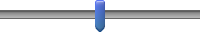 |
| --- | --- |

B20 Consumo otras sustancias al mismo tiempo con la cocaína, por ejemplo alcohol, tabaco, marihuana, éxtasis, etc.

|  | Nunca | Algunas veces | Siempre |
| --- | --- | --- | --- |

|  | 1 | 2 | 3 | 4 | 5 |
| --- | --- | --- | --- | --- | --- |

| 1 () | 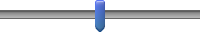 |
| --- | --- |

B21 Cuando consumo cocaína al mismo tiempo con otras sustancias modero o disminuyo la cantidad de ambas.

|  | Nunca | Siempre | No consumo cocaína con otras sustancias |
| --- | --- | --- | --- |

|  | 1 | 2 | 3 | 4 | 5 |
| --- | --- | --- | --- | --- | --- |

| 1 () | 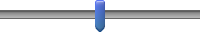 |
| --- | --- |

B22 Cuando consumo cocaína tomo agua.

|  | Nunca | Algunas veces | Siempre |
| --- | --- | --- | --- |

|  | 1 | 2 | 3 | 4 | 5 |
| --- | --- | --- | --- | --- | --- |

| 1 () | 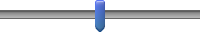 |
| --- | --- |

B23 Mastico chicles (goma de mascar) o como dulces para evitar la tensión de la mandíbula.

|  | Nunca | Siempre | No he experimentado esos efectos |
| --- | --- | --- | --- |

|  | 1 | 2 | 3 | 4 | 5 |
| --- | --- | --- | --- | --- | --- |

| 1 () | 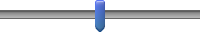 |
| --- | --- |

B24 Detengo el consumo de cocaína si percibo efectos negativos como por ejemplo ansiedad, irritabilidad, palpitaciones, dolor y/o presión en el pecho, dolor de cabeza, migraña, convulsiones, sangrado nasal, dificultad para respirar, etc.

|  | Nunca | Siempre | No he experimentado esos efectos |
| --- | --- | --- | --- |

|  | 1 | 2 | 3 | 4 | 5 |
| --- | --- | --- | --- | --- | --- |

| 1 () | 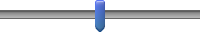 |
| --- | --- |

B25 Cuando siento efectos negativos con la cocaína (ansiedad, mal viaje o estimulación excesiva), trato de calmarme controlando mi respiración.

|  | Nunca | Siempre | No he experimentado esos efectos |
| --- | --- | --- | --- |

|  | 1 | 2 | 3 | 4 | 5 |
| --- | --- | --- | --- | --- | --- |

| 1 () | 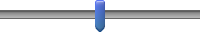 |
| --- | --- |

B26 Cuando siento efectos negativos **más intensos** con la cocaína (palpitaciones, dolor y/o presión en el pecho, dolor de cabeza, migraña, convulsiones, sangrado nasal, dificultad para respirar, etc.) busco atención profesional.

|  | Nunca | Siempre | No he experimentado esos efectos |
| --- | --- | --- | --- |

|  | 1 | 2 | 3 | 4 | 5 |
| --- | --- | --- | --- | --- | --- |

| 1 () | 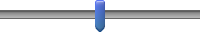 |
| --- | --- |

B27 Detengo el consumo de cocaína si se presenta una situación difícil de manejar como por ejemplo una riña, un conflicto con la ley, si alguien se accidenta o le da una sobredosis.

|  | Nunca | Siempre | No me ha ocurrido |
| --- | --- | --- | --- |

|  | 1 | 2 | 3 | 4 | 5 |
| --- | --- | --- | --- | --- | --- |

| 1 () | 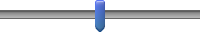 |
| --- | --- |

B28 Llevo conmigo preservativos/condones.

|  | Nunca | Algunas veces | Siempre |
| --- | --- | --- | --- |

|  | 1 | 2 | 3 | 4 | 5 |
| --- | --- | --- | --- | --- | --- |

| 1 () | 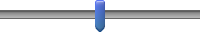 |
| --- | --- |

B29 Utilizo preservativos/condones durante las relaciones sexuales que tengo bajo los efectos de la cocaína.

|  | Nunca | Siempre | No tengo relacionas bajo los efectos de la cocaína |
| --- | --- | --- | --- |

|  | 1 | 2 | 3 | 4 | 5 |
| --- | --- | --- | --- | --- | --- |

| 1 () | 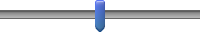 |
| --- | --- |

B30 Llevo conmigo una cantidad permitida de cocaína en el país en que me encuentro (dosis mínima legal).

|  | Nunca | Siempre | No existe una cantidad permitida en mi país |
| --- | --- | --- | --- |

|  | 1 | 2 | 3 | 4 | 5 |
| --- | --- | --- | --- | --- | --- |

| 1 () | 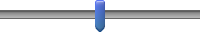 |
| --- | --- |

B31 Conduzco un vehículo u opero una máquina bajo los efectos de la cocaína.

|  | Nunca | Algunas veces | Siempre |
| --- | --- | --- | --- |

|  | 1 | 2 | 3 | 4 | 5 |
| --- | --- | --- | --- | --- | --- |

| 1 () | 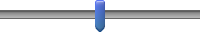 |
| --- | --- |

B32 Tomo un transporte seguro cuando estoy bajo el efecto de la cocaína (un conductor designado o un servicio público).

|  | Nunca | Algunas veces | Siempre |
| --- | --- | --- | --- |

|  | 1 | 2 | 3 | 4 | 5 |
| --- | --- | --- | --- | --- | --- |

| 1 () | 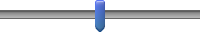 |
| --- | --- |

**Fin del bloque: DURANTE**

**Comienzo de bloque: DESPUÉS**

0 En este apartado le pediremos que califique de 1 a 5 siendo 1 nunca y 5 siempre, en el último año, ¿con qué frecuencia han ocurrido estas conductas **después del consumo de cocaína**?

C1 Limpio mis fosas nasales con agua o suero después de una ocasión de consumo.

|  | Nunca | Algunas veces | Siempre |
| --- | --- | --- | --- |

|  | 1 | 2 | 3 | 4 | 5 |
| --- | --- | --- | --- | --- | --- |

| 1 () | 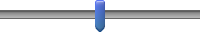 |
| --- | --- |

C2 Humecto mis fosas nasales con bálsamo, aceite o crema después del consumo de cocaína.

|  | Nunca | Algunas veces | Siempre |
| --- | --- | --- | --- |

|  | 1 | 2 | 3 | 4 | 5 |
| --- | --- | --- | --- | --- | --- |

| 1 () | 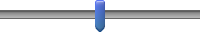 |
| --- | --- |

C3 Descanso después de consumir cocaína.

|  | Nunca | Algunas veces | Siempre |
| --- | --- | --- | --- |

|  | 1 | 2 | 3 | 4 | 5 |
| --- | --- | --- | --- | --- | --- |

| 1 () | 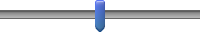 |
| --- | --- |

C4 Me alimento después de consumir cocaína.

|  | Nunca | Algunas veces | Siempre |
| --- | --- | --- | --- |

|  | 1 | 2 | 3 | 4 | 5 |
| --- | --- | --- | --- | --- | --- |

| 1 () | 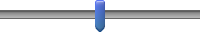 |
| --- | --- |

C5 Me hidrato con agua o suero después de consumir cocaína.

|  | Nunca | Algunas veces | Siempre |
| --- | --- | --- | --- |

|  | 1 | 2 | 3 | 4 | 5 |
| --- | --- | --- | --- | --- | --- |

| 1 () | 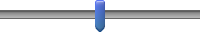 |
| --- | --- |

C6 Realizo actividades que disfruto para contrarrestar el bajón (un estado de ánimo negativo que aparece después del consumo de cocaína).

|  | Nunca | Siempre | No he experimentado esos efectos |
| --- | --- | --- | --- |

|  | 1 | 2 | 3 | 4 | 5 |
| --- | --- | --- | --- | --- | --- |

| 1 () | 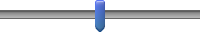 |
| --- | --- |

C7 Cuando me expongo a una situación de riesgo (por ejemplo golpes, lesiones o relaciones sexuales sin protección), busco atención médica o jurídica para atender las consecuencias negativas.

|  | Nunca | Siempre | No me he expuesto |
| --- | --- | --- | --- |

|  | 1 | 2 | 3 | 4 | 5 |
| --- | --- | --- | --- | --- | --- |

| 1 () | 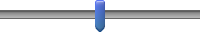 |
| --- | --- |

C8 Consumo más cocaína para evitar el bajón (un estado de ánimo negativo que aparece después del consumo de cocaína).

|  | Nunca | Siempre | No he experimentado esos efectos |
| --- | --- | --- | --- |

|  | 1 | 2 | 3 | 4 | 5 |
| --- | --- | --- | --- | --- | --- |

| 1 () | 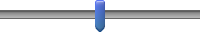 |
| --- | --- |

C9 Dejo pasar al menos tres semanas entre una ocasión de consumo y la otra.

|  | Nunca | Algunas veces | Siempre |
| --- | --- | --- | --- |

|  | 1 | 2 | 3 | 4 | 5 |
| --- | --- | --- | --- | --- | --- |

| 1 () | 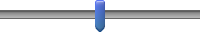 |
| --- | --- |

C10 Disminuyo la cantidad y frecuencia del consumo de cocaína si percibo efectos negativos en diferentes áreas de mi vida como por ejemplo problemas físicos, psicológicos o sociales (familiares, laborales/académicos, económicos, legales, etc)

|  | Nunca | Siempre | No he experimentado esos efectos |
| --- | --- | --- | --- |

|  | 1 | 2 | 3 | 4 | 5 |
| --- | --- | --- | --- | --- | --- |

| 1 () | 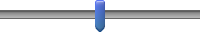 |
| --- | --- |

**Fin del bloque: DESPUÉS**

**Comienzo de bloque: MODERACIÓN/EVITACIÓN**

0 En este apartado le pediremos que califique de 1 a 5 siendo 1 nunca y 5 siempre, en el último año, ¿con qué frecuencia han ocurrido estas conductas?

D1 Cuando no quiero consumir cocaína realizo otras actividades que disfruto como por ejemplo ir a comer, ir al cine, salir con personas que no consumen cocaína, etc.

|  | Nunca | Algunas veces | Siempre |
| --- | --- | --- | --- |

|  | 1 | 2 | 3 | 4 | 5 |
| --- | --- | --- | --- | --- | --- |

| 1 () | 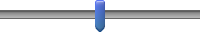 |
| --- | --- |

D2 Cuando no quiero consumir cocaína dirijo o pongo mi atención a otros aspectos importantes de mi vida como el trabajo, estudio, la familia o amigos.

|  | Nunca | Algunas veces | Siempre |
| --- | --- | --- | --- |

|  | 1 | 2 | 3 | 4 | 5 |
| --- | --- | --- | --- | --- | --- |

| 1 () | 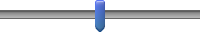 |
| --- | --- |

D3 Cuando no quiero consumir cocaína, busco realizar actividades que me ayudan a manejar el deseo o la ansiedad, como hacer deporte o meditar.

|  | Nunca | Algunas veces | Siempre |
| --- | --- | --- | --- |

|  | 1 | 2 | 3 | 4 | 5 |
| --- | --- | --- | --- | --- | --- |

| 1 () | 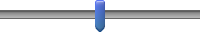 |
| --- | --- |

D4 Tengo disponible una dosis de reserva de cocaína, por ejemplo en mi billetera, cartera o en mi hogar.

|  | Nunca | Algunas veces | Siempre |
| --- | --- | --- | --- |

|  | 1 | 2 | 3 | 4 | 5 |
| --- | --- | --- | --- | --- | --- |

| 1 () | 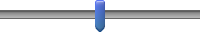 |
| --- | --- |

D5 Busco asesoría de un profesional de la salud (un psicólogo/a, médico/a o consejero/a en adicciones) si percibo efectos negativos por el consumo de cocaína, como incapacidad para moderar el consumo, problemas físicos, psicológicos o sociales.

|  | Nunca | Siempre | No he experimentado esos efectos |
| --- | --- | --- | --- |

|  | 1 | 2 | 3 | 4 | 5 |
| --- | --- | --- | --- | --- | --- |

| 1 () | 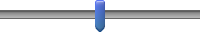 |
| --- | --- |

**Fin del bloque: MODERACIÓN/EVITACIÓN**

**Comienzo de bloque: CONSECUENCIAS**

FÍSICAS Seleccione los problemas físicos que haya experimentado **como consecuencia del consumo de cocaína** (puede seleccionar varios)

- Pérdida excesiva de peso (1)
- Dormir demasiado (2)
- Dormir muy poco (3)
- Fatiga/cansancio (4)
- Hiperactividad (5)
- Temblores (6)
- Comportamientos autodestructivos (7)
- Pérdida de apetito (8)
- Disminución del deseo sexual (9)
- Dolores de cabeza (10)
- Pérdida de conciencia (11)
- Lagunas de pensamiento/memoria (no recordar lo que se ha hecho) (12)
- Baja/Disminución de energía (13)
- Hospitalizaciones médicas (14)
- Dolor(es) de pecho (15)
- Otros dolores (16)
- Consumo excesivo de alcohol (17)
- Consumo excesivo de tabaco (18)
- Laseraciones o hemorragias nasales (19)
- Ninguno (20)

PSICOLÓGICAS Seleccione los problemas psicológicos que haya experimentado **como consecuencia del consumo de cocaína** (puede seleccionar varios)

- Dificultad para concentrarse (1)
- Dificultad para organizarse (2)
- Dificultad para prestar atención (3)
- Irritabilidad/agitación (4)
- Desconfianza/paranoia (5)
- Oir voces o ruidos que no existen (6)
- Ver cosas que no están ahí (7)
- Desorientación (8)
- Olvidos/ dificultades para recordar (9)
- Pensamientos acelerados (10)
- Pensamientos ralentizados (lentos) (11)
- Sensación de insuficiencia (12)
- Sensación de inutilidad (13)
- Sensación de desesperanza (14)
- Tristeza (15)
- Enojo (16)
- Hospitalizaciones psiquiátricas (17)
- Euforia incontrolable (18)
- Pensamientos suicidas (19)
- Intento de suicidio (20)
- Nerviosismo/ansiedad (21)
- Ataques de pánico (22)
- Pérdida de interés por las actividades habituales (23)
- Culpabilidad/verguenza (24)
- Apatía (no le importa nada) (25)
- Depresión (26)
- Ninguno (27)

SOCIALES Seleccione los problemas sociales que haya experimentado **como consecuencia del consumo de cocaína** (puede seleccionar varios)

- Discusiones con los compañeros de trabajo (1)
- Discusiones con los miembros de la familia (2)
- Peleas físicas (3)
- Pérdida de trabajo (4)
- Faltar al trabajo o a la escuela (5)
- Llegar tarde al trabajo o a la escuela (6)
- Aislamiento social (7)
- Poco cooperativo (8)
- Reducción de la productividad (9)
- Ruptura del matrimonio (10)
- Pérdida de amigos (11)
- Mentir a los demás (12)
- Ocultar cosas a los demás (13)
- Problemas con el cónyuge (novia/novio) (14)
- Problemas con los amigos (15)
- Problemas con compañero/s de trabajo (16)
- Dificultades económicas (17)
- Menos implicación en su trabajo (18)
- Comportamiento sexual alterado (19)
- Ruptura con la pareja (20)
- Ninguno (21)

LEGALES Seleccione los problemas legales que haya experimentado **como consecuencia del consumo de cocaína** (puede seleccionar varios)

- Daños a propiedad ajena (1)
- Accidente en carro/automóvil (2)
- Tráfico de drogas (3)
- Arresto (4)
- Imposibilidad de pagar las cuentas/facturas (5)
- Desalojo de la propiedad (6)
- Propiedad embargada (7)
- Robo/ hurto (8)
- Conducir bajo la influencia de cualquier sustancia (9)
- Cárcel/prisión (10)
- Ninguno (11)

**Fin del bloque: CONSECUENCIAS**
