# Supplementary material for: Development and Validation of a Spanish-Language Protective Behavioral Strategies Scale for People Who Snort Cocaine: Evidence from Mexico, Colombia, and Chile
Source: Research Square preprint supplement (doi:10.21203/rs.3.rs-7041559/v1), 2025-07-10
Supplement: Supplementary file 7 [file fdf42621271e4738f57133e6.xlsx]

## Sheet: Cocaine harms
	Related	Categories	Subcategories	Definición	Risk and harms
	To users	Physical: the propensity of a drug to cause physical harm—ie, damage to organs or systems	Drug-specific mortality	Intrinsic lethality of the drug expressed as ratio of lethal dose and standard dose (for adults)	Intoxication, overdose, mortality risk due to route of administration.
			Drug-related mortality	The extent to which life is shortened by the use of the drug (excludes drug-specifi c mortality)—eg, road traffic accidents, lung cancers, HIV, suicide	Increased progression of HIV disease, interaction with HIV medicine, death by plasma pseudocholinesterase deficiency, increased progression of HIV disease due to route of administration, suicide, homicide victims, motor vehicle accidents and fatalities, fatal injuries.
			Drug-specific damage	Drug-specific damage to physical health—eg, cirrhosis, seizures, strokes, cardiomyopathy, stomach ulcers	Cardiovascular diseases, cerebrovascular complications, seizures, renal diseases, gastrointestinal disease, respiratory problems, pregnancy cerebrovascular accident
			Drug-related damage	Drug-related damage to physical health, including consequences of, for example, sexual unwanted activities and self-harm, blood-borne viruses, emphysema, and damage from cutting agents	Overdose or Intoxication associated with mixing with other substances, Diseases due to adulterants, Ulcerative lesions due to the use of non-hygienic paraphernalia, Blood-borne viruses for sharing paraphernalia, Blood-borne viruses for risky sexual activities, Skin and soft tissue infections (SSTIs) por vía inyectada, Necrosis of the nasal mucosa, nasal septal perforation and extensive paranasal …
		Psychological	Dependence	The extent to which a drug creates a propensity or urge to continue to use despite adverse consequences (ICD 10 or DSM IV)	Dependence/ use disorder, withdrawal, use disorder related to hereditary factors, increased risk of dependence by route of administration
			Drug-specific impairment of mental functioning	Drug-specific impairment of mental functioning—eg, amfetamine-induced psychosis, ketamine intoxication	Stimulant-induced psychotic disorder ("Schizophrenia Spectrum and Other Psychotic Disorders"), stimulant-induced bipolar disorder ("Bipolar and Related Disorders"), stimulant-induced depressive disorder ("Depressive Disorders"), stimulant-induced anxiety disorder ("Anxiety Disorders"), stimulant-induced obsessivecompulsive disorder ("Obsessive-Compulsive and Related Disorders"), stimulant-induced…
			Drug-related impairment of mental functioning	Drug-related impairment of mental functioning—eg, mood disorders secondary to drug-user’s lifestyle or drug use	Eating disorders, sexual dysfunction, alcohol use disorder, polydrug abuse, greater risk of developing future problems associated with moderate internal negative psychological states, psychiatric and social comorbidities, psychiatric complications
		Social	Loss of tangibles	Extent of loss of tangible things (eg, income, housing, job, educational achievements, criminal record, imprisonment)	Loss of all monetary assets, unemployed and economics problems, absenteeism coupled with reduced productivity at work, homeless, school dropout
			Loss of relationships	Extent of loss of relationship with family and friends
	To others	Physical and psychological	Injury	Extent to which the use of a drug increases the chance of injuries to others both directly and indirectly—eg, violence (including domestic violence), traffi c accident, fetal harm, drug waste, secondary transmission of blood-borne viruses	Risks to the fetus, obstetrical Complications, violence
		Social	Crime	Extent to which the use of a drug involves or leads to an increase in volume of acquisitive crime (beyond the use-ofdrug act) directly or indirectly (at the population level, not the individual level)	Non-violent drug-related crimes, violent crime, delinquent behaviors such as stealing and vandalism
			Family adversities	Extent to which the use of a drug causes family adversities— eg, family breakdown, economic wellbeing, emotional wellbeing, future prospects of children, child neglect	Child abuse or neglect, unstable environments, sexual maltreatment, family problems, shorter marriage durations, social and family problems
			Environmental damage	Extent to which the use and production of a drug causes environmental damage locally—eg, toxic waste from amfetamine factories, discarded needles
			International damage	Extent to which the use of a drug in the UK contributes to damage internationally—eg, deforestation, destabilisation of countries, international crime, new markets
			Economic cost	Extent to which the use of a drug causes direct costs to the country (eg, health care, police, prisons, social services, customs, insurance, crime) and indirect costs (eg, loss of productivity, absenteeism)
			Community	Extent to which the use of a drug creates decline in social cohesion and decline in the reputation of the community

## Sheet: 1.1 Physical
	Related	Categories	Subcategories	Definición		Harm	Evidence	Cita	Reference	Harm reduction recomendation	Reference	Protective cognitive strategies	Protective behavioral strategies
	To users	Physical: the propensity of a drug to cause physical harm—ie, damage to organs or systems	Drug-specific mortality	Intrinsic lethality of the drug expressed as ratio of lethal dose and standard dose (for adults)	Mortalidad asociada a la sobredosis (las características farmacológicas de la sustancia y su dosificación).	Intoxication	A. Recent use of an amphetamine-type substance, cocaine, or other stimulant. B. Clinically significant problematic behavioral or psychological changes (e.g., euphoria or affective blunting: changes in sociability: hypervigilance: interpersonal sensitivity: anxiety, tension, or anger; stereotyped behaviors: impaired judgment) that developed during, or shortly after, use of a stimulant. C. Two (or …	American Psychiatric Association [APA], 2013	Diagnostic and Statistical Manual of Mental Disorders, 5th ed. by American Psychiatric Association (2013)	Information about the effects (signs and symptoms, mechanism of action, duration, etc)	2,4,6,5,7,9,10,12,13,14	Conozco los efectos de la cocaína y los diferentes factores que influyen en estos p.ej. la cantidad de sustancia consumida, su pureza, la vía de administración, mi tolerancia, etc.
										Use more precise dosing methods, such as the precision balance.	13	Conozco la dosificación que usaré porque uso metodos precisos como el uso de una balanza.
										Information about coomon side effects	5,7,9, 12	Conozco los efectos no deseados más comunes del uso de cocaína
										It is better to be in quiet places where you feel safe.	2022-05-11		Consumo cocaína en ambientes seguros p.ej. en mi casa o en casa de mis amigos, en lugares destinados al consumo o en lugares tolerantes al consumo, acompañado de personas de confianza.
										Under the influence of many psychoactive substances, especially while dancing, your body temperature increases and you lose a lot of fluids. Balance this by taking breaks from dancing, cooling off , and drinking enough soft drinks —but no energy drinks. However, no more than ½ liter per hour.	10,13		Me hidrato con suficiente agua
						Overdose	At higher doses, more severe signs and symptoms may develop, such as hypertension, tremor, hyperactivity, hyperthermia, hyperreflexia, cardiac arrhythmias, and convulsions (Benowitz, 1993). Death may be caused by cardiac arrest or infarction and cerebral haemorrhage or infarction (Callaway & Clark, 1994; Davis & Swalwell, 1996).	Ferri et al. 2004	Ferri, C. P., Dunn, J., Gossop, M., & Laranjeira, R. (2004). Factors associated with adverse reactions to cocaine among a sample of long-term, high-dose users in São Paulo, Brazil. Addictive Behaviors, 29(2), 365–374. doi:10.1016/j.addbeh.2003.08.029	Dosage information and recommendations	4,5,7,9,12,13		Consumo inicialmente una dosis baja de cocaína y en función de los efectos decido si quiero consumir más
							Dysphoric agitation may be the first symptom of cocaine intoxication. It can develop rapidly and may be fatal. '00 Cocaine intoxication (resembling drunkenness) has been associated with myriad effects. The spectrum of intoxication ranges from euphoria, alertness, decreased appetite, sleep disorders, and feelings of enhanced energy to assaultive behavior, paranoid ideation, delirium, syncope, naus…	Cregler, 1989	Cregler, L. L. (1989), ‘Adverse health consequences of cocaine abuse’, Journal of the National Medical Association, 81, p. 27.	Establish a cocaine quantity limit	5,12,13,14		Establezco una cantidad de cocaína límite para consumir en una sesión de consumo* y no la sobrepaso
										No one forces you to put everything they put in front of you. Take your own rhythm.	5		La presión de los demas me hace consumir más cocaína de la que quiero
							Overdose of cocaine can result in fatal monomorphic ventricular tachycardia by blocking sodium channels (Bauman and DiDomenico, 2002). Extreme overdose on stimulants can result in profound hyperthermia, with subsequent risks for rhabdomyolisis, seizures, and death (Callaway and Clark, 1994). falta aterrizar entonces definición	Grund et al. 2010	Grund, J. P., Coffin, P., Jauffret-Roustide, M., Dijkstra, M., De Bruin, D., & Blanken, P. (2010). The fast and furious—cocaine, amphetamines and harm reduction. Monographs, 191.	Avoid frequent redosing	6,1,14		Consumo varías dosis en una sesión de consumo*
							Plasma concentrations increased rapidly for the first 20 to 30 minutes after inhalation, reaching peak levels before 60 minutes, and then decreased gradually over the next hour. Higher doses yielded higher peak plasma values. Although there was a positive relationship between the timing of peak plasma concentrations of cocaine and that of its subjective and cardiovascular effects, plasma levels o…	Javaid et al. 1978	Javaid, J., Fischman, M., Schuster, C., Dekirmenjian, H., & Davis, J. (1978). Cocaine plasma concentration: relation to physiological and subjective effects in humans. Science, 202(4364), 227–228. doi:10.1126/science.694530	Aware of the signs of overdose	1,5, 7,12, 13	Conozco los signos y síntomas de una sobredosis	Reconozco los signos y sintomas de una sobredosis de cocaína
										Seek immediate assistance if you or your friend shows any overdose symptoms	1,7		Sé como actuar frente a una sobredosis
										Make sure you [use cocaine] with people who can take care of you if you [use] too much	Sánchez-García, M., Lozano-Rojas, Ó. M., Díaz-Batanero, C., Carmona-Márquez, J., Rojas-Tejada, A. J., & Fernández-Calderón, F. (2020). Spanish Adaptation of the Protective Behavioral Strategies Scale-20 (S-PBSS-20) and Evaluation of its Psychometric Properties in University Students. Psicothema, 32(4), 598–606. https://doi.org/10.7334/psicothema2020.172		Uso cocaína en compañía de personas que sabrían que hacer en caso de sobredosis
						Mortality risk due to route of administration	Deaths have occurred after administration of cocaine by all routes.12,18"152-154 Most deaths are attributed to generalized convulsions, respiratory failure, or cardiac arrhythmias.1',x1214	Cregler, 1989	Cregler, L. L. (1989), ‘Adverse health consequences of cocaine abuse’, Journal of the National Medical Association, 81, p. 27.	Many psychoactive substances can be taken in a variety of ways. Therefore, find out about the least harmful way of consumption .	2,5,6,9	Conozco los riesgos asociados al uso de las diferentes vías de administración de la cocaína
							Daily or dependent cocaine injectors or crack smokers, who may have a higher mortality risk than regular or dependent cocaine users who snort the drug (Degenhardt et al., 2011b).	Škařupová, 2014	Škařupová, K. (2014). The levels of use of opioids, amphetamines and cocaine, and associated levels of harm: summary of scientific evidence. Curr Protoc Microbiol, March, 1-21.	The most harmful way to take cocaine is by injecting it, especially when combined with heroin (“speedballs”). The least harmful way of taking cocaine is by snorting: the effects come on gradually and last longer than other forms of use.	6,9,10,13		Prefiero vías de administración de menor riesgo, por ejemplo esnifada*
							Injecting cocaine and smoking it in the form of crack are routes of administration associated with rapid onset of action and the delivery of a bolus of drug to the brain and other organs. These routes are more strongly associated with acute adverse reactions (Pottieger, Tressell, Inciardi, & Rosales, 1992).	Ferri et al. 2004	Ferri, C. P., Dunn, J., Gossop, M., & Laranjeira, R. (2004). Factors associated with adverse reactions to cocaine among a sample of long-term, high-dose users in São Paulo, Brazil. Addictive Behaviors, 29(2), 365–374. doi:10.1016/j.addbeh.2003.08.029
							The epidemiologic, pathological, and toxicological findings of 60 cocaine-related overdose deaths from middle 1978 through 1982 were studied and compared with a previous publication by this office. In addition, 180 deaths where cocaine was an incidental toxicological finding are also discussed. Currently, the average street cocaine fatality victim is 29 years old, and 42% of the victims are femal…	Mittleman, 1984	Mittleman, R. E. (1984). Death Caused by Recreational Cocaine Use. JAMA, 252(14), 1889. doi:10.1001/jama.1984.03350140035021
			Drug-related mortality	The extent to which life is shortened by the use of the drug (excludes drug-specifi c mortality)—eg, road traffic accidents, lung cancers, HIV, suicide	Mortalidad asociada a los daños que produce el consumo de la sustancia, incluyendo aquellas condiciones que acortan la vida (p.ej. enfermedad crónica o discapacidad)	Increased progression of HIV disease	Stimulant use may hasten progression of HIV disease, although data are conflicting. Cocaine use has been associated with poor anti-retroviral initiation and adherence (Brewer et al., 2007) Current or past cocaine use is associated with less favorable laboratory parameters (T cell and viral load) among patients on HIV treatment (Cofrancesco et al., 2008). Stimulants have been associated with more …	Grund et al. 2010	Grund, J. P., Coffin, P., Jauffret-Roustide, M., Dijkstra, M., De Bruin, D., & Blanken, P. (2010). The fast and furious—cocaine, amphetamines and harm reduction. Monographs, 191.	No evidence of recommendations		Conozco los riesgos asociados al consumo de cocaína durante el tratamiento con medicamentos para el HIV
													Evito el consumo de cocaína si tengo HIV
						Interaction with HIV medicine	Clinical relevance unknown as cocaine is metabolized by other non-CYP mediated pathways. Ensure patient is aware of signs/symptoms of cocaine toxicity (tremor, seizures, anxiety, headache, increased body temperature). Potential increased exposure of the recreational drug. One or both drugs may cause QT and/or PR prolongation. ECG monitoring is advised if coadministered with atazanavir or lopinavi…	Liverpool Drug Interactions Group, 2022	Liverpool Drug Interactions Group, University of Liverpool. (2022). Antiretrovirals and Recreational Drugs. https://liverpool-hiv-hep.s3.amazonaws.com/prescribing_resources/pdfs/000/000/033/original/TS_Recreational_2022_Jun.pdf?1655809134	No evidence of recommendations		Conozco los riesgos de consumir cocaína si se tengo antecedentes de enfermedades físicas como HIV
													Evito el consumo de cocaína si me encuentro tomando medicamentos para el tratamiento de VIH
						Death by plasma pseudocholinesterase deficiency	Individuals with plasma pseudocholinesterase deficiency are at risk for sudden death when using cocaine because this enzyme is essential in the metabolization of the drug.	Cregler, 1989	Cregler, L. L. (1989), ‘Adverse health consequences of cocaine abuse’, Journal of the National Medical Association, 81, p. 27.	No evidence of recommendations		Conozco los riesgos de consumir cocaína si se tengo antecedentes de enfermedades físicas como Deficiencia de pseudocolinesterasa plasmática
													Evito el consumo de cocaína si tengo deficiencia de pseudocolinesterasa plasmática
						Increased progression of HIV disease due to route of administration	People who used cocaine had lower HIV treatment adherence and viral suppression than those who did not use. People who used powder cocaine only were more likely to be younger, Hispanic/Latinx, and employed than those who used crack only or both. Compared to people who used both powder and crack cocaine, those who used one form of cocaine had 3 + odds of having durable viral suppression in the fol…	Liu et al. 2021	Liu, Y., Richards, V. L., Gebru, N. M., Spencer, E. C., & Cook, R. L. (2021). Associations amongst form of cocaine used (powder vs crack vs both) and HIV-related outcomes. Addictive Behaviors Reports, 14, 100374. doi:10.1016/j.abrep.2021.100374	Only use if you feel good mentally and physically.	2		Consumo cocaína solo si me estado físico es optimo
						Suicide	Stimulant use is also associated with suicide (Kertesz et al., 2006; Scott et al., 2007).	Grund, et al. 2010	Grund, J. P., Coffin, P., Jauffret-Roustide, M., Dijkstra, M., De Bruin, D., & Blanken, P. (2010). The fast and furious—cocaine, amphetamines and harm reduction. Monographs, 191.	Information about mental health consecuences	9	Conozco los signos y síntomas del trastorno depresivo, así como los signos de alarma frente al suicidio
							Suicide can be viewed as a form of self-destructive, violent behavior. In one study of 749 cases of suicide in New York City, cocaine was present in 18% to 22% of cases.20 Suicide may be caused by depression, which occurs frequently in people using cocaine.	Morton, 1999	Morton W. A. (1999). Cocaine and Psychiatric Symptoms. Primary care companion to the Journal of clinical psychiatry, 1(4), 109–113. https://doi.org/10.4088/pcc.v01n0403	Only use if you feel good mentally and physically.	2		Consumo cocaína solo si mi estado de ánimo es optimo
										If this is difficult for you, or if you have other mental or physical problems, you should seek professional help.	10		Busco asesoría profesional si se percibo efectos adversos como tristeza profunda y constante, pérdida de interés por la vida, pensamientos suicidas
						Homicide victims	Studies on the prevalence of cocaine among homicide victims were more common. The proportion of those testing positive for cocaine among those fatally injured ranged from 9 to 40% (M = 30.9%) (Fig. 2). Two studies examined cocaine use among those suffering from non-fatal, intentional injuries. Peden et al. (2000) found that 2.7% of patients with intentional injuries tested positive for cocaine wh…	Macdonald et al. 2003	Macdonald, S., Anglin-Bodrug, K., Mann, R. E., Erickson, P., Hathaway, A., Chipman, M., & Rylett, M. (2003). Injury risk associated with cannabis and cocaine use. Drug and Alcohol Dependence, 72(2), 99–115. doi:10.1016/s0376-8716(03)00202-3	Place of ingestion and people with you influence the effect of the substance - negative moods can be increased. Therefore, only consume in an atmosphere that is comfortable for you , if you feel good and trustworthy friends are nearby.	10		Consumo cocaína en ambientes seguros y libres de violencia, p.ej. en mi casa o en casa de mis amigos, en lugares destinados al consumo o en lugares tolerantes al consumo, acompañadx de personas de confianza.
						Motor vehicle accidents and fatalities	Cases (n = 737) were drivers who were involved in fatal motor vehicle crashes in the continental United States during specific time periods in 2007, and controls (n = 7719) were participants of the 2007 National Roadside Survey of Alcohol and Drug Use by Drivers. Overall, 31.9% of the cases and 13.7% of the controls tested positive for at least one non-alcohol drug. The estimated odds ratios of f…	Li et al. 2013	Li, G., Brady, J. E., & Chen, Q. (2013). Drug use and fatal motor vehicle crashes: A case-control study. Accident Analysis & Prevention, 60, 205–210. doi:10.1016/j.aap.2013.09.001	Do not drive any type of vehicle.	5,10,12		He realizado actividades como conducir un vehiculo u operar una máquina, bajo los efectos de la cocaína
							This study examined the incidence of alcohol and drugs in a sample of seriously injured motor vehicle collision victims, and differences related to pre-crash use of alcohol and/or other drugs on demographic variables, injury severity measures, and crash variables. The sample selected were all motor vehicle collision admissions to the Regional Trauma Unit at the Sunnybrook Health Science Centre in…	Stoduto et al. 1993	Stoduto, G., Vingilis, E., Kapur, B. M., Sheu, W.-J., McLellan, B. A., & Liban, C. B. (1993). Alcohol and drug use among motor vehicle collision victims admitted to a regional trauma unit: demographic, injury, and crash characteristics. Accident Analysis & Prevention, 25(4), 411–420. doi:10.1016/0001-4575(93)90070-d
							The percent of fatally injured drivers testing positive for cocaine ranged from 0.3 to 9.8% (M = 4.6%) and for non-fatally injured drivers ranged from 0.6 to 5.6% (M = 4.3%) (see Fig. 2). A smaller subset of these aforementioned review articles also examined the relationship between cocaine use and collisions. These reviews concluded that research has not clearly demonstrated an increased risk of…	Macdonald et al. 2003	Macdonald, S., Anglin-Bodrug, K., Mann, R. E., Erickson, P., Hathaway, A., Chipman, M., & Rylett, M. (2003). Injury risk associated with cannabis and cocaine use. Drug and Alcohol Dependence, 72(2), 99–115. doi:10.1016/s0376-8716(03)00202-3
							We determined the prevalence of recent cocaine and alcohol use among motor vehicle fatalities occurring in New York, NY, from 1984 through 1987. Recent cocaine use was detected at autopsy in 18.2% of the sample and no significant difference between drivers (20.0%) and passengers (13.9%) was found. Both alcohol and cocaine metabolites were found in 10.0% of cases tested. The prevalence of cocaine …	Marzuk et al. 1990	Marzuk PM, Tardiff K, Leon AC, Stajic M, Morgan EB, Mann JJ. Prevalence of Recent Cocaine Use Among Motor Vehicle Fatalities in New York City. JAMA. 1990;263(2):250–256. doi:10.1001/jama.1990.03440020084038	Refuse to travel in a car with someone who has been [using drugs]	Sánchez-García, M., Lozano-Rojas, Ó. M., Díaz-Batanero, C., Carmona-Márquez, J., Rojas-Tejada, A. J., & Fernández-Calderón, F. (2020). Spanish Adaptation of the Protective Behavioral Strategies Scale-20 (S-PBSS-20) and Evaluation of its Psychometric Properties in University Students. Psicothema, 32(4), 598–606. https://doi.org/10.7334/psicothema2020.172		Me niego a subir en un vehículo que conduce alguien que ha estado usando drogas
						Fatal injuries	Cocaine use, as measured by the detection of the metabolite benzoylecgonine in urine or blood, was found in 26.7 percent of all New York City residents receiving fatal injuries; free cocaine was detected in 18.3 percent. Approximately one third of deaths after cocaine use were the result of drug intoxication, but two thirds involved traumatic injuries resulting from homicides, suicides, traffic a…	Marzuk et al. 1990	Marzuk PM, Tardiff K, Leon AC, Stajic M, Morgan EB, Mann JJ. Prevalence of Recent Cocaine Use Among Motor Vehicle Fatalities in New York City. JAMA. 1990;263(2):250–256. doi:10.1001/jama.1990.03440020084038
							Several studies have taken drug tests of patients with any type of injury (see Part C of Table 1). The contexts of these injuries are highly heterogeneous which may help to explain the large variation in study results in terms of those who test positive (Macdonald et al., 1999). Figs. 1 and 2 show the range of those who tested positive for either cannabis or cocaine. For cocaine, between 8.0 and …	Macdonald et al. 2003	Macdonald, S., Anglin-Bodrug, K., Mann, R. E., Erickson, P., Hathaway, A., Chipman, M., & Rylett, M. (2003). Injury risk associated with cannabis and cocaine use. Drug and Alcohol Dependence, 72(2), 99–115. doi:10.1016/s0376-8716(03)00202-3
			Drug-specific damage	Drug-specific damage to physical health—eg, cirrhosis, seizures, strokes, cardiomyopathy, stomach ulcers	Daños físicos causados por el efecto de la sustancia sobre el cuerpo p.ej. enfermedades hepáticas, cardiovarculares, renales, gastrointestinales.etc.	Cardiovascular diseases	Twenty-four patients who suffered acute myocardial infarctions (mean age 32 years, range 19 to 44) with a temporal relation to the use of cocaine were reported between 1982 and early 1986.4'-54 Thirteen reports of myocardial infarction associated with cocaine occurred in persons with pre-existing angina or a prior myocardial infarction unrelated to cocaine use. These patients had underlying fixed…	Cregler, 1989	Cregler, L. L. (1989), ‘Adverse health consequences of cocaine abuse’, Journal of the National Medical Association, 81, p. 27.	Information about the riks for physical heatlh	2,6,7,13	Conozco los riesgos para la salud física del uso de cocaína
							Cardiac arrhythmias can occur as a result of cocaine abuse and may be attributed either to a direct effect of the drug or, more likely, to its effects on catecholamines. Cocaine blocks the reuptake of norepinephrine by presynaptic nerve endings which may be important in enhancing beta stimulation of the myocardium. Arrhythmias associated with cocaine use include sinus bradycardia, sinus tachycard…	Cregler, 1989	Cregler, L. L. (1989), ‘Adverse health consequences of cocaine abuse’, Journal of the National Medical Association, 81, p. 27.	Information about contraindications	2,4,5,6,9	Conozco las condiciones físicas para las que el uso de cocaína está contraindicado
							Prolonged cocaine use accelerates atherosclerosis (Kloner et al., 1992) and accumulation of metabolites in cardiac tissue may have further detrimental effects (Schindler et al., 1995).	Grund et al. 2010	Grund, J. P., Coffin, P., Jauffret-Roustide, M., Dijkstra, M., De Bruin, D., & Blanken, P. (2010). The fast and furious—cocaine, amphetamines and harm reduction. Monographs, 191.	Space your consumption to decrease adverse effects or long-term effects	1,2,5,7,9,13		Consumo habitualmente cocaína, con menos de tres semanas de diferencia entre una sesión de consumo* y la otra
							Cardiovascular effects: strokes, hemorrhages and blood clots. Persistent vasoconstriction may lead to reduced brain perfusion and associated cognitive deficits that may or may not resolve with abstinence (Nnadi et al., 2005).	Grund et al. 2010	Grund, J. P., Coffin, P., Jauffret-Roustide, M., Dijkstra, M., De Bruin, D., & Blanken, P. (2010). The fast and furious—cocaine, amphetamines and harm reduction. Monographs, 191.	Only use if you feel good mentally and physically.	2		Consumo cocaína solo si me estado físico es optimo
							Cardiovascular toxicities of cocaine are well-established (Vandhuick et al., 2004). Cocaine results in adrenergic activation through effects on norepinephrine and clot formation through activation of platelets, resulting in increased cardiac oxygen demand, coronary artery spasm, and coronary artery thrombosis. ‘Cocaine chest pain’ is usually not a sign of cardiac ischemia, yet cocaine also increa…	Grund et al. 2010	Grund, J. P., Coffin, P., Jauffret-Roustide, M., Dijkstra, M., De Bruin, D., & Blanken, P. (2010). The fast and furious—cocaine, amphetamines and harm reduction. Monographs, 191.	Stop taking if you feel more negative than positive effects (too much stimulation, chest pain, cramps, shortness of breath, abdominal pain).	5		Evito el consumo de cocaína si tengo enfermedades cardiovasculares, renales, gastrointestinales, neuronales.
													Detengo el consumo de cocaína si percibo efectos adversos en la salud física p.ej palpitaciones/arritmia, taquicardia, dolor y/o presión en el pecho, hipertensión, dolores de cabeza/ migraña, convulsiones, infecciones en la piel, sangrado nasal o daño en la mucosas nasales, soplo cardiaco, dificultad para respirar con cualquier actividad, etc.
						Cerebrovascular complications	Tachycardia and blood pressure elevation occur within minutes of taking cocaine intranasally.73 The mechanism of cerebrovascular accidents is probably related to adrenergic stimulation and a sudden surge in blood pressure. Sudden increases of blood pressure in otherwise normotensive persons may precipitate spontaneous bleeding. 73 The incidence of subarachnoid hemorrhage from the use of cocaine i…	Cregler, 1989	Cregler, L. L. (1989), ‘Adverse health consequences of cocaine abuse’, Journal of the National Medical Association, 81, p. 27.	If this is difficult for you, or if you have other mental or physical problems, you should seek professional help.	10		Busco asesoría profesional si percibo efectos adversos en mi salud física p.ej palpitaciones/arritmia, taquicardia, dolor y/o presión en el pecho, hipertensión, dolores de cabeza/ migraña, convulsiones, infecciones en la piel, sangrado nasal o daño en la mucosas nasales, soplo cardiaco, dificultad para respirar con cualquier actividad, etc.
							Cerebrovascular complications include ischaemic disease, intraparenchymal and subarachnoid haemorrhage, atrophy and seizures (Brown et al., 1992; Treadwell and Robinson, 2007).	Škařupová, 2014	Škařupová, K. (2014). The levels of use of opioids, amphetamines and cocaine, and associated levels of harm: summary of scientific evidence. Curr Protoc Microbiol, March, 1-21.	Do not carry out intense physical activity. Physical exercise under the effects of cocaine can cause heart attacks or serious cardiac injuries.	12		Consumo cocaína para realizar actividad física intensa
						Seizures	Convulsions were among the earliest known adverse effects of cocaine6"10 and can be induced after a single dose of the drug.80 Hyperpyrexia can occur after cocaine use and can lead to seizures, possibly cardiac arrhythmias, and even death.8 '82 Because cocaine lowers the seizure threshold, seizures can be primary or secondary.22'68 There is excellent evidence that cocaine has the capacity to "kin…	Cregler, 1989	Cregler, L. L. (1989), ‘Adverse health consequences of cocaine abuse’, Journal of the National Medical Association, 81, p. 27.
						Renal diseases	Renal diseases related to stimulants include glomerulonephritites, largely believed to be associated with IDU and contaminants, and tubulointerstitial processes resulting from vasoconstrictive properties in the setting of preexisting mild renal disease (Crowe et al., 2000; Jaffe and Kimmel, 2006). Uncommon complications include renal infarction and rhabdomyolisis.	Grund, et al. 2010	Grund, J. P., Coffin, P., Jauffret-Roustide, M., Dijkstra, M., De Bruin, D., & Blanken, P. (2010). The fast and furious—cocaine, amphetamines and harm reduction. Monographs, 191.
						Gastrointestinal disease	Gastroschesis, or slowed gastric processing of food, has been associated with use of stimulants (Draper et al., 2008), and cocaine use has been associated with intestinal ischemia, likely due to both vasoconstrictor and pro-thrombogenic effects (Glauser and Queen, 2007).	Grund, et al. 2010	Grund, J. P., Coffin, P., Jauffret-Roustide, M., Dijkstra, M., De Bruin, D., & Blanken, P. (2010). The fast and furious—cocaine, amphetamines and harm reduction. Monographs, 191.
						Respiratory problems	Inhaling or smoking freebase cocaine is reported to produce a significant reduction of carbon monoxide-diffusing capacity of the lungs.111,112	Cregler, 1989	Cregler, L. L. (1989), ‘Adverse health consequences of cocaine abuse’, Journal of the National Medical Association, 81, p. 27.
						Pregnancy cerebrovascular accident	Cocaine use during pregnancy may place the fetus at risk for a cerebrovascular accident.76 Maternal cocaine use should be included in the differential diagnosis of neonates with perinatal cerebral infarction. Physicians caring for patients with headaches that follow cocaine use should be aware of the possibility of intracranial hemorrhage.'8 73 The risk of stroke from intravenous use with bolus e…	Cregler, 1989	Cregler, L. L. (1989), ‘Adverse health consequences of cocaine abuse’, Journal of the National Medical Association, 81, p. 27.	Do not use during pregnancy.	2		Evito el uso de cocaína durante el embarazo y la lactancia
			Drug-related damage	Drug-related damage to physical health, including consequences of, for example, sexual unwanted activities and self-harm, blood-borne viruses, emphysema, and damage from cutting agents	Riegos o daños físicos relacionados con factores asociados al uso de cocaína p.ej. daños en organos y tejidos relacionados con la vía de adimistración, daños asocidados a la mezcla con otras sustancias, daños por presencia de adulterantes, intoxicación por sustituyentes, daños asociados a factores personales como el género y daños asocidados a conductas de riesgo como compartir parafernalia o ten…	Overdose or Intoxication associated with mixing with other substances	Use of alcohol and cocaine together leads to production of cocaethylene, which is believed to increase the cardiotoxic effects of both drugs (Kertesz et al., 2007), increases the tachycardia produced by cocaine, and may increase the tendency toward violent thoughts and threats (Farre et al., 1997; Pennings et al., 2002). Use of ecstasy, amphetamine, and cocaine in a club setting result in a relat…	Grund, et al. 2010	Grund, J. P., Coffin, P., Jauffret-Roustide, M., Dijkstra, M., De Bruin, D., & Blanken, P. (2010). The fast and furious—cocaine, amphetamines and harm reduction. Monographs, 191.	Information on the risks of mixing cocaine with other substances	1,2,3,4,5,6,7,12,13	Conozco las interacciones de otras sustancias con la cocaína y sus posibles riesgos de mezclar
							Adverse reactions were more severe among patients who also tended to use stimulants with opiates or benzodiazepines.	Ferri et al. 2004	Ferri, C. P., Dunn, J., Gossop, M., & Laranjeira, R. (2004). Factors associated with adverse reactions to cocaine among a sample of long-term, high-dose users in São Paulo, Brazil. Addictive Behaviors, 29(2), 365–374. doi:10.1016/j.addbeh.2003.08.029	Avoid mixing cocaine with other drugs	1,2,3,4,5,6,7,12,13,14		Mezclo cocaína con otras sustancias
							Cocaine–alcohol produced greater euphoria and increased perception of well-being relative to cocaine. Heart rate significantly increased following cocaine–alcohol administration relative to either drug alone. Cocaine concentrations were greater following cocaine–alcohol administration. Cocaethylene had a longer half-life with increasing concentrations relative to cocaine at later time points. Enh…	McCance-Katz et al. 1998	McCance-Katz, E. F., Kosten, T. R., & Jatlow, P. (1998). Concurrent use of cocaine and alcohol is more potent and potentially more toxic than use of either alone—A multiple-dose study. Biological Psychiatry, 44(4), 250–259. doi:10.1016/s0006-3223(97)00426-5	If you are going to mix, always with caution	5		Prefiero las mezclas que sé que tiene un menor riesgo para mi salud
							Combinations of ETOH, COC and task performance produce greater increases in HR than BP, and, in addition, this increase in HR is greater than that observed following COC, ETOH, or task performance alone.	Foltin & Fischman, 1988	Foltin, R. W., & Fischman, M. W. (1988). Ethanol and cocaine interactions in humans: Cardiovascular consequences. Pharmacology Biochemistry and Behavior, 31(4), 877–883. doi:10.1016/0091-3057(88)90399-1
							Marihuana smoking increases plasma cocaine levels and subjective reports of euphoria in male volunteers. Marihuana-induced vasodilation of the nasal mucosa attenuates the vasoconstrictive effects of cocaine and thus increases its absorption.	Lukas et al. 1994	Lukas, S. E., Sholar, M., Kouri, E., Fukuzako, H., & Mendelson, J. H. (1994). Marihuana smoking increases plasma cocaine levels and subjective reports of euphoria in male volunteers. Pharmacology Biochemistry and Behavior, 48(3), 715–721. doi:10.1016/0091-3057(94)90338-7
							Concurrent ingestion of cocaine and alcohol results in cocaethylene production [20, 21]. Cocaethylene is a pharmacologically active homolog of cocaine with an increased metabolic half-life and may play a role in reinforcement effects of cocaine.	McCance-Katz EF, Kosten TR, Jatlow P: Concurrent use of cocaine and alcohol is more potent and potentially more toxic than use of either alone – a multiple-dose study. Biol Psychiatry. 1998, 44: 250-9. 10.1016/S0006-3223(97)00426-5.	McCance-Katz EF, Kosten TR, Jatlow P: Concurrent use of cocaine and alcohol is more potent and potentially more toxic than use of either alone – a multiple-dose study. Biol Psychiatry. 1998, 44: 250-9. 10.1016/S0006-3223(97)00426-5.
							Cocaine overdoses are often associated with concurrent opioid use; solely cocaine use can page 20 of 53 nevertheless lead to death due to a variety of sudden causes, including stroke, cocaineinduced seizures and cardiac complications (Lange and Hillis, 2001; Glauser and Queen, 2007; Cregler, 1989, 1991).	Škařupová, 2014	Škařupová, K. (2014). The levels of use of opioids, amphetamines and cocaine, and associated levels of harm: summary of scientific evidence. Curr Protoc Microbiol, March, 1-21.
						Diseases due to adulterants	Renal diseases related to stimulants include glomerulonephritites, largely believed to be associated with contaminants (Crowe et al., 2000; Jaffe and Kimmel, 2006).	Grund, et al. 2010	Grund, J. P., Coffin, P., Jauffret-Roustide, M., Dijkstra, M., De Bruin, D., & Blanken, P. (2010). The fast and furious—cocaine, amphetamines and harm reduction. Monographs, 191.	Adulteration of cocaine is very common. Sometimes with toxic and dangerous adulterants. Whenever possible use a Drug Checking service. The most reliable and easiest way to test the purity of cocaine is to drop a little powder into a glass beaker with cold water and bleach. The cocaine is quickly diluted, while the impurities settle to the bottom of the glass.	2,4,5,7,12		Conozco el contenido de la sustancia antes de consumirla / Hago uso de servicios de análisis de sustancias
							Phenacetin, diltiazem and hydroxyzine resulted to be the three cocaine adulterants that contributed most to hallucinatory and cardiac side effects (5), with levamisole adulterated cocaine causing pulmonary lymphocytic vasculitis-related fatalities (6).	Francesco P. Busardò, Simona Pichini, Roberta Pacifici, Steven B. Karch, The Never-Ending Public Health Issue of Adulterants in Abused Drugs, Journal of Analytical Toxicology, Volume 40, Issue 7, September 2016, Pages 561–562, https://doi.org/10.1093/jat/bkw051	Francesco P. Busardò, Simona Pichini, Roberta Pacifici, Steven B. Karch, The Never-Ending Public Health Issue of Adulterants in Abused Drugs, Journal of Analytical Toxicology, Volume 40, Issue 7, September 2016, Pages 561–562, https://doi.org/10.1093/jat/bkw051			Sé que es común que la cocaína se venda en el mercado adulterada e incluso a veces sustituida.
							The chronic use of levamisole-adulterated cocaine represents a serious public health issue because it may be responsible for side-effects such as dermal vasculopathy, leukoencephalopathy, leukopenia, agranulocytosis, pulmonary hemorrhage, multiple emboli, and several other effects.	Martello, S., Pieri, M., Ialongo, C., Pignalosa, S., Noce, G., Vernich, F., … Marsella, L. T. (2017). Levamisole in Illicit Trafficking Cocaine Seized: A One-Year Study. Journal of Psychoactive Drugs, 49(5), 408–412. doi:10.1080/02791072.2017.1361558	Martello, S., Pieri, M., Ialongo, C., Pignalosa, S., Noce, G., Vernich, F., … Marsella, L. T. (2017). Levamisole in Illicit Trafficking Cocaine Seized: A One-Year Study. Journal of Psychoactive Drugs, 49(5), 408–412. doi:10.1080/02791072.2017.1361558			Conozco los principales adulterantes de la cocaína y los riesgos por su consumo
							Cocaine-induced vasculitis should be one of the differential diagnoses in cocaine abusers who present with painful rash and areas of necrosis.	Swe, T., Pervil-Ulysse, M., & Baqui, A. A. (2016). Cocaine-induced vasculitis with cutaneous manifestation: A recurrent episode after 2 years. Journal of family medicine and primary care, 5(3), 712–715. https://doi.org/10.4103/2249-4863.197294	Swe, T., Pervil-Ulysse, M., & Baqui, A. A. (2016). Cocaine-induced vasculitis with cutaneous manifestation: A recurrent episode after 2 years. Journal of family medicine and primary care, 5(3), 712–715. https://doi.org/10.4103/2249-4863.197294	Cocaine is sold adulterated, try some and see how it hits you. Chop it well and make fine lines to break the stones it may have.	11		Consumo inicialmente una dosis baja de cocaína (20-50mg) y en función de los efectos decido si quiero consumir más
													Adquiero la sustancia de una fuente confiable p.ej. un vendedor al que frecuento o un amigo
													Consumo cocaína aún cuando tengo conocimiento o sospecha de que está adulterada o sustituida
						Ulcerative lesions due to the use of non-hygienic paraphernalia	Ulcerative lesions affecting the midface were considered for differential diagnosis including traumatic, infectious and neoplasic	Ballage et al. 2017	Ballage, A., Elharti, M., Naceur, S., Rouadi, S., Rl, A., Roubal, M., & Mahtar, M. (2017). Nasal Septum Perforation due to Cocaïne Abuse.	Always use your accessories	7		Hago uso de parafernalia* adecuada para el consumo de menor riesgo de cocaína como p.ej. pitillo/ popotes o tubos desechables o de vidrio
						Blood-borne viruses for sharing paraphernalia	HCV is also prevalent among non-injection stimulant users, with rates of 2.3–35.3 % among those who sniff or smoke stimulants (Scheinmann et al., 2007). Hepatitis B (HBV) infection has also been associated with injection and non-injection drug use (NIDU), although the availability of a vaccine has greatly reduced infection rates (Kottiri et al., 2005). HCV is present in gingival fluid (Suzuki et …	Grund, et al. 2010	Grund, J. P., Coffin, P., Jauffret-Roustide, M., Dijkstra, M., De Bruin, D., & Blanken, P. (2010). The fast and furious—cocaine, amphetamines and harm reduction. Monographs, 191.	Avoid sharing straws, preferably marked so there is no confusion.	1,2,4,7,8,12,14		Comparto la parafernalia* con otras personas
							Non-injecting cocaine users from South America are vulnerable to multiple infections and HCV infection appears to occur through the sharing of straws.	Caiaffa et al. 2011	Caiaffa, W. T., Zocratto, K. F., Osimani, M. L., Martínez, P. L., Radulich, G., Latorre, L., Muzzio, E., Segura, M., Chiparelli, H., Russi, J., Rey, J., Vazquez, E., Cuchi, P., Sosa-Estani, S., Rossi, D., & Weissenbacher, M. (2011). Hepatitis C virus among non-injecting cocaine users (NICUs) in South America: can injectors be a bridge?. Addiction (Abingdon, England), 106(1), 143–151. https://doi.…	Bleach, if used according to the recommendations of the Centers for Disease Control and Prevention, the National Institute on Drug Abuse, and the Center for Substance Abuse Treatment, is likely to be an effective HIV prevention strategy for injection drug users who share needles and syringes.	National Research Council (US) and Institute of Medicine (US) Panel on Needle Exchange and Bleach Distribution Programs; Normand J, Vlahov D, Moses LE, editors. Preventing HIV Transmission: The Role of Sterile Needles and Bleach. Washington (DC): National Academies Press (US); 1995. 6, The Effectiveness of Bleach as a Disinfectant of Injection Drug Equipment. Available from: https://www.ncbi.nlm.…		Desinfecto con cloro la parafernalia* despues de cada sesión de consumo
										Bleach was the most effective disinfectant after 1 rinse, whereas other diluted household products required multiple rinses to eliminate HCV.	Mawuena Binka, Elijah Paintsil, Amisha Patel, Brett D. Lindenbach, Robert Heimer, Disinfection of Syringes Contaminated With Hepatitis C Virus by Rinsing With Household Products, Open Forum Infectious Diseases, Volume 2, Issue 1, Winter 2015, ofv017, https://doi.org/10.1093/ofid/ofv017
							HIV and hepatitis C (HCV) transmission among stimulant injectors has been associated with higher injecting frequency (Kral et al., 2001; Gibson et al., 2002) and needle sharing (Rotheram-Borus et al., 1999). Frequent cocaine injection is a factor in the failure of selected syringe exchange programmes to prevent HIV transmission (Wood et al., 2002). HCV rates are very high, even among recent initi…	Grund, et al. 2010	Grund, J. P., Coffin, P., Jauffret-Roustide, M., Dijkstra, M., De Bruin, D., & Blanken, P. (2010). The fast and furious—cocaine, amphetamines and harm reduction. Monographs, 191.	Avoid inappropriate paraphernalia	8,12,13		Utilizo papeles, billetes, llaves, etc como instrumento para esnifar* cocaína
						Blood-borne viruses for risky sexual activities	Transmission of blood-borne viruses is consistently associated with stimulant use (Mitchell et al., 2006), due primarily to high-frequency use and to increased risky sexual behaviors. Stimulant use is associated with infrequent condom use (Edlin et al., 1992) Stimulants have been associated with increased incidence of many sexually transmitted diseases including syphilis, gonorrhea, and chancroid…	Grund, et al. 2010	Grund, J. P., Coffin, P., Jauffret-Roustide, M., Dijkstra, M., De Bruin, D., & Blanken, P. (2010). The fast and furious—cocaine, amphetamines and harm reduction. Monographs, 191.	Cocainecan increase your feelings and release inhibitions.	6,10,12	Conozco los efectos que causa la cocaína sobre la conducta sexual
							HCV infection is associated with intimate relationships with IDUs or HIV-seropositive partners, supporting the hypothesis that HCV risk may be due primarily to risk-taking behaviour associated with drugs in this population.	Caiaffa, W. T., Zocratto, K. F., Osimani, M. L., Martínez, P. L., Radulich, G., Latorre, L., Muzzio, E., Segura, M., Chiparelli, H., Russi, J., Rey, J., Vazquez, E., Cuchi, P., Sosa-Estani, S., Rossi, D., & Weissenbacher, M. (2011). Hepatitis C virus among non-injecting cocaine users (NICUs) in South America: can injectors be a bridge?. Addiction (Abingdon, England), 106(1), 143–151. https://doi.…	Caiaffa, W. T., Zocratto, K. F., Osimani, M. L., Martínez, P. L., Radulich, G., Latorre, L., Muzzio, E., Segura, M., Chiparelli, H., Russi, J., Rey, J., Vazquez, E., Cuchi, P., Sosa-Estani, S., Rossi, D., & Weissenbacher, M. (2011). Hepatitis C virus among non-injecting cocaine users (NICUs) in South America: can injectors be a bridge?. Addiction (Abingdon, England), 106(1), 143–151. https://doi.…	Always remember to use protection in sexual relations	5		Utilizo preservativos y lubricantes durante las relaciones sexuales que tengo bajo los efectos de la cocaína
						Skin and soft tissue infections (SSTIs) por vía inyectada	Skin and soft tissue infections (SSTIs) affect 10–30 % of injecting drug users (IDUs) (Binswanger et al., 2000; Murphy et al., 2001; Ciccarone et al., 2001) and are associated with loss of venous access and reliance on intramuscular or subcutaneous injection (Ciccarone and Bourgeois, 2003; Lloyd-Smith et al., 2008; Binswanger et al., 2000)	Grund, et al. 2010	Grund, J. P., Coffin, P., Jauffret-Roustide, M., Dijkstra, M., De Bruin, D., & Blanken, P. (2010). The fast and furious—cocaine, amphetamines and harm reduction. Monographs, 191.	The most harmful way to take cocaine is by injecting it, especially when combined with heroin (“speedballs”). The least harmful way of taking cocaine is by snorting: the effects come on gradually and last longer than other forms of use.	6,9,10,13		Prefiero vías de administración de menor riesgo, por ejemplo esnifada*
						Necrosis of the nasal mucosa, nasal septal perforation and extensive paranasal destruction by sniffing	Cocaine’s intense local vasoconstrictive effects, however, and mucosal irritation from the other powdered substances with which it is “cut” (eg, talc, mannitol, lactose, amphetamines, borax, plaster of paris) may lead to inflammation, ulceration of the nasal mucosa, and eventually, ischemic necrosis with subsequent perforation of the septum, sometimes as early as 3 weeks after the start of regula…	Seyer et al. 2002	Seyer, B. A., Grist, W., & Muller, S. (2002). Aggressive destructive midfacial lesion from cocaine abuse. Oral Surgery, Oral Medicine, Oral Pathology, Oral Radiology, and Endodontology, 94(4), 465–470. doi:10.1067/moe.2002.126020	Spray the substance well.	12, 13,14		Prepararo adecuadamente la cocaína antes de consumirla, pulverizandola finamente
							Intranasal cocaine use is clearly associated with septal necrosis and perforation (Glauser and Queen, 2007).	Grund, et al. 2010	Grund, J. P., Coffin, P., Jauffret-Roustide, M., Dijkstra, M., De Bruin, D., & Blanken, P. (2010). The fast and furious—cocaine, amphetamines and harm reduction. Monographs, 191.	Snorting can injure nasal mucous membranes. Alternate between the two nostrils	4,11		Alterno mis fosas al consumir cocaína
							Intranasal sniffing of cocaine hydrochloride powder may result in necrosis of the nasal mucosa, nasal septal perforation and may even progress to extensive paranasa l destruction. Thi s can cIinicaIly resemble destructive processes such as Wegener's granulomatosis or midfacial lymphoma.	Armstrong et al. 1996	Armstrong M, Shikani AH. Nasal Septal Necrosis Mimicking Wegener’s Granulomatosis in a Cocaine Abuser. Ear, Nose & Throat Journal. 1996;75(9):623-626. doi:10.1177/014556139607500913	rinse it with saline solution after sniffing. Aspirate some warm water to clean the debris that may remain stuck.	4,11,12,13		Limpio mis fosas nasales antes, durante y después el consumo
							patients with nasal septal perforation will benefit from a regimen of nasal hygiene including routine saline lavage. Sodium hypochlorite can be added, used nightly with 1-liter irrigation. Humidification of the environment with application of nasal emollients such as petroleum jelly, Ayr saline nasal gel (BF Ascher, Lenexa, KS), Bactroban (Glaxo SmithKline, Research Triangle Park, NC)) may reduce…	Metzinger et al. 2005	Stephen Eric Metzinger, MD, Aldo Benjamin Guerra, MD, Diagnosing and Treating Nasal Septal Perforations, Aesthetic Surgery Journal, Volume 25, Issue 5, September 2005, Pages 524–529, https://doi.org/10.1016/j.asj.2005.06.002	Moisturize my mucous membranes	4,11,12,13		Humecto mis mucosas nasales con balsamo despues del cosnumo
							Loss of sense of smell, atrophy of the nasal mucosa, and necrosis and perforation of the nasal septum can occur with intranasal administration. '09'10	Cregler, 1989	Cregler, L. L. (1989), ‘Adverse health consequences of cocaine abuse’, Journal of the National Medical Association, 81, p. 27.
						Transition to use by other higher-risk routes	Eight-one per cent of our sample began using cocaine by snorting, agreeing with a previous study where 84% of the cocaine users in Sao Paulo [8] had chosen this route on the first occasion. Although the majority of the sample reported first use of cocaine by this route, 68% of those individuals went on to experience crack cocaine and 9% injected cocaine at some time of their life. However, when c…	Guindalini, C., Vallada, H., Breen, G. et al. Concurrent crack and powder cocaine users from Sao Paulo: Do they represent a different group?. BMC Public Health 6, 10 (2006). https://doi.org/10.1186/1471-2458-6-10	Guindalini, C., Vallada, H., Breen, G. et al. Concurrent crack and powder cocaine users from Sao Paulo: Do they represent a different group?. BMC Public Health 6, 10 (2006). https://doi.org/10.1186/1471-2458-6-10	The most harmful way to take cocaine is by injecting it, especially when combined with heroin (“speedballs”). The least harmful way of taking cocaine is by snorting: the effects come on gradually and last longer than other forms of use.	6,9,10,13		Prefiero vías de administración de menor riesgo, por ejemplo esnifada*
						Non-fatal injuries	Cocaine use is associated with accidents	Daley et al. 2002	Daley, D. C., Mercer, D. and Carpenter, G. (2002), Drug counseling for cocaine addiction: the collaborative cocaine treatment study model, National Institute on Drug Abuse, Bethesda, Maryland.	Do not drive any type of vehicle.	5,10,12		He realizado actividades como conducir un vehiculo u operar una máquina, bajo los efectos de la cocaína
							Several studies have taken drug tests of patients with any type of injury (see Part C of Table 1). The contexts of these injuries are highly heterogeneous which may help to explain the large variation in study results in terms of those who test positive (Macdonald et al., 1999). Figs. 1 and 2 show the range of those who tested positive for either cannabis or cocaine. For cocaine between 0.0 and 5…	Macdonald et al. 2003	Macdonald, S., Anglin-Bodrug, K., Mann, R. E., Erickson, P., Hathaway, A., Chipman, M., & Rylett, M. (2003). Injury risk associated with cannabis and cocaine use. Drug and Alcohol Dependence, 72(2), 99–115. doi:10.1016/s0376-8716(03)00202-3	Only [use] in safe environments	Novik, M. G., & Boekeloo, B. O. (2011). Dimensionality and psychometric analysis of an alcohol protective behavioral strategies scale. Journal of drug education, 41(1), 65–78. https://doi.org/10.2190/DE.41.1.d		Consumo cocaína en ambientes seguros p.ej. en mi casa o en casa de mis amigos, en lugares destinados al consumo o en lugares tolerantes al consumo, acompañado de personas de confianza.
							we examine the relationship between illicit drug use (including cocaine) and workplace accidents among young adults in the United States in two complementary ways. The first, examines whether individuals who use drugs are more likely than their non-using counterparts to experience an accident on the job. The second focuses on the individual's consumption choices. The results are mixed. For young …	Kaestner & Grossman, 1998	Kaestner, R., & Grossman, M. (1998). The effect of drug use on workplace accidents. Labour Economics, 5(3), 267–294. doi:10.1016/s0927-5371(97)00021-3	Make sure you have trusted company , someone who knows how to react in an emergency.	13		Consumo cocaína en compañia de personas en quien confío
										Hang out with trusted friends	Novik, M. G., & Boekeloo, B. O. (2011). Dimensionality and psychometric analysis of an alcohol protective behavioral strategies scale. Journal of drug education, 41(1), 65–78. https://doi.org/10.2190/DE.41.1.d
										Refuse [cocaine] from a stranger	Novik, M. G., & Boekeloo, B. O. (2011). Dimensionality and psychometric analysis of an alcohol protective behavioral strategies scale. Journal of drug education, 41(1), 65–78. https://doi.org/10.2190/DE.41.1.d		No recibo cocaína de extraños
						Violent intentional injuries	In general, survey studies reveal a strong relation between cocaine use and intentional injuries. In a study of 171 cocaine using women, 62% reported suffering a physical attack (Falck et al., 2001). A similar study of male and female cocaine users who were not in treatment found that 63% had suffered a physical attack (Siegal et al. 2000). Macdonald and Wells (2001) found that those with self-re…	Macdonald, S., Anglin-Bodrug, K., Mann, R. E., Erickson, P., Hathaway, A., Chipman, M., & Rylett, M. (2003). Injury risk associated with cannabis and cocaine use. Drug and Alcohol Dependence, 72(2), 99–115. doi:10.1016/s0376-8716(03)00202-3	Macdonald, S., Anglin-Bodrug, K., Mann, R. E., Erickson, P., Hathaway, A., Chipman, M., & Rylett, M. (2003). Injury risk associated with cannabis and cocaine use. Drug and Alcohol Dependence, 72(2), 99–115. doi:10.1016/s0376-8716(03)00202-3	Place of ingestion and people with you influence the effect of the substance - negative moods can be increased. Therefore, only consume in an atmosphere that is comfortable for you , if you feel good and trustworthy friends are nearby.	10		Consumo cocaína en ambientes seguros y libres de violencia, p.ej. en mi casa o en casa de mis amigos, en lugares destinados al consumo o en lugares tolerantes al consumo, acompañadx de personas de confianza.
						Trading sex for money or drugs	Another risk behavior that has been well documented among cocaine users, including those in rural communities, is the existence of a sexual economy that involves repeated transactional sex, which may include trading oral or vaginal sex for food, shelter, or other necessities as well as for drugs or money	Gullette, D., Booth, B. M., Wright, P. B., Montgomery, B. E. E., & Stewart, K. E. (2014). Sexual Sensation Seeking, Transactional Sex, and Rural African American Cocaine Users. Journal of the Association of Nurses in AIDS Care, 25(4), 289–296. doi:10.1016/j.jana.2013.07.008 Wright, P. B., McSweeney, J. C., Frith, S. E., Stewart, K. E., & Booth, B. M. (2009). Losing All the Pieces: A Qualitative S…	Gullette, D., Booth, B. M., Wright, P. B., Montgomery, B. E. E., & Stewart, K. E. (2014). Sexual Sensation Seeking, Transactional Sex, and Rural African American Cocaine Users. Journal of the Association of Nurses in AIDS Care, 25(4), 289–296. doi:10.1016/j.jana.2013.07.008 Wright, P. B., McSweeney, J. C., Frith, S. E., Stewart, K. E., & Booth, B. M. (2009). Losing All the Pieces: A Qualitative S…	No evidence of recommendations			Realizo transacciones de sexo por cocaína o por dinero para comprarla
						Dangerous lifestyles	Cocaine injectors and crack cocaine smokers are often involved in more dangerous lifestyles and use the drug on a daily basis or more often, which subsequently puts them at risk of negative consequences (Gossop et al.,1994; Lexau et al., 1998).	Škařupová, 2014	Škařupová, K. (2014). The levels of use of opioids, amphetamines and cocaine, and associated levels of harm: summary of scientific evidence. Curr Protoc Microbiol, March, 1-21.	Increased risk behaviour due to disinhibition and overestimation of self. Eat well, sleep well, rest is essential	6,2, 11,13		Me alimento bien y descanso después de consumir cocaína.
						Personal differences	Male subjects achieved the highest peak plasma cocaine levels (144.4 ± 17.5 ng/ml), detected cocaine effects significantly faster than females and also experienced a greater number of episodes of intense good and bad effects. Women studied during the follicular phase of their menstrual cycle had peak plasma cocaine levels of 73.2 ± 9.9 ng/ml, which was significantly higher than when they were stu…	Lukas, S.E., Sholar, M., Lundahl, L.H. et al. Sex differences in plasma cocaine levels and subjective effects after acute cocaine administration in human volunteers. Psychopharmacology 125, 346–354 (1996). https://doi.org/10.1007/BF02246017	Lukas, S.E., Sholar, M., Lundahl, L.H. et al. Sex differences in plasma cocaine levels and subjective effects after acute cocaine administration in human volunteers. Psychopharmacology 125, 346–354 (1996). https://doi.org/10.1007/BF02246017	Age, gender, body weight, etc.	2,5,6,10	Conozco los efectos de la cocaína en función de mis características personales (sexo, edad)
							The analysis also suggests that several of the function statements were more likely to be endorsed by females than males. However, why the female respondents were more likely to perceive use in a functional way is unclear. Certainly, if this indicates an underlying trend that female users are more likely than males to use cocaine as a social support, particularly to help them to feel less inhibit…	Boys, A., Marsden, J., Griffiths, P., & Strang, J. (2000). Drug use functions predict cocaine-related problems in young people. Drug and Alcohol Review, 19(2), 181–190. doi:10.1080/713659316	Boys, A., Marsden, J., Griffiths, P., & Strang, J. (2000). Drug use functions predict cocaine-related problems in young people. Drug and Alcohol Review, 19(2), 181–190. doi:10.1080/713659316

## Sheet: 1.2 Psychological
	Related	Categories	Subcategories	Definición		Harm	Evidence	Referencia	Referencia	Harm reduction recomendation	Reference	Protective cognitive strategies	Protective behavioral strategies
		Psychological	Dependence	The extent to which a drug creates a propensity or urge to continue to use despite adverse consequences (ICD 10 or DSM IV)	Trastornos por uso de estimulantes (cocaína)	Dependence/ use disorder	A. A pattern of amphetamine-type substance, cocaine, or other stimulant use leading to clinically significant impairment or distress, as manifested by at least two of the following, occurring within a 12-month period: 1. The stimulant is often taken in larger amounts or over a longer period than was intended. 2. There is a persistent desire or unsuccessful efforts to cut down or control stimulant…	American Psychiatric Association [APA], 2013	Diagnostic and Statistical Manual of Mental Disorders, 5th ed. by American Psychiatric Association (2013)	Information about the risk of developing cocaine use disorder	2,12,6,13	Tengo conocimiento de que la cocaína es una sustancia psicoactiva capaz de generar dependencia (trastorno por uso de sustancias)
							Both cocaine and crack cocaine users are prone to developing severe dependence due to the reinforcing character of the experience (Arif, 1987).	Škařupová, 2014	Škařupová, K. (2014). The levels of use of opioids, amphetamines and cocaine, and associated levels of harm: summary of scientific evidence. Curr Protoc Microbiol, March, 1-21.	Be on the lookout if: You take it to relieve lows. You make up your mind not to drink and you don't get it. You keep taking cocaine despite having problems with it	5	Conozco los signos y síntomas de alerta para identificar si estoy desarollando un trastorno por uso de cocaína
							Cocaine induces plasticity in the dopaminergic system largely responsible for drug craving (Nnadi et al., 2005).	Grund et al. 2010	Grund, J. P., Coffin, P., Jauffret-Roustide, M., Dijkstra, M., De Bruin, D., & Blanken, P. (2010). The fast and furious—cocaine, amphetamines and harm reduction. Monographs, 191.	Avoid long term use	1,2,4		Consumo habitualmente cocaína, con menos de tres semanas de diferencia entre una sesión de consumo y la otra
							The average social/recreational abuser uses 1 to 4 grams of cocaine per month. Cocaine is purchased in halfgram quantities and consumed over a two to seven day period. The average daily consumption would be approximately 150 mg.8 The development of a compulsive use pattern and addiction is a major complication of cocaine abuse. Addiction is defined as a compulsion to use a drug, loss of control o…	Cregler, 1989	Cregler, L. L. (1989), ‘Adverse health consequences of cocaine abuse’, Journal of the National Medical Association, 81, p. 27.	If consumption becomes regular, you should take longer breaks to avoid developing psychological dependence. If you have problems controlling your consumption, you should seek advice and support from staff at a counseling center.	9		Tengo periodos de desintoxicación o abstinencia entre mis consumos
										Be on the lookout if you make taking cocaine or being with people who take cocaine the center of your activities.	5		No permito que el consumo se convierta en el eje central de mi vida/ El consumo de cocaína es una de las cosas más importantes de mi vida
							In terms of frequency of use, daily or every second day use seem to have the strongest association with unhealthy lifestyles, impairment in physical and mental health, involvement in riskier sexual behaviours and the highest dependence levels. High-frequency use is associated, especially among women, with involvement in human immunodeficiency virus (HIV)-risk behaviour (DeBeck et al., 2011; Edlin…	Škařupová, 2014	Škařupová, K. (2014). The levels of use of opioids, amphetamines and cocaine, and associated levels of harm: summary of scientific evidence. Curr Protoc Microbiol, March, 1-21.				Detengo el consumo de cocaína si percibo que aparecen signos y síntomas del trastorno por consumo de cocaína como preocupación sobre el consumo, imposibilidad de dejar de consumir, tolerancia, abstinencia, craving, etc.
							The three most common problems endorsed by the sample were impaired control (67.1%), —prioritising spending money on cocaine over other things˜(66.7%) and being pre-occupied with using (66.1%). C	Boys et al. 2000	Boys, A., Marsden, J., Griffiths, P., & Strang, J. (2000). Drug use functions predict cocaine-related problems in young people. Drug and Alcohol Review, 19(2), 181–190. doi:10.1080/713659316	If this is difficult for you, or if you have other mental or physical problems, you should seek professional help.	5,10		Busco asesoría profesional si percibo que aparecen signos y síntomas del trastorno por consumo de cocaína como preocupación sobre el consumo, imposibilidad de dejar de consumir, tolerancia, abstinencia, craving, etc.
						Withdrawal	A. Cessation of (or reduction in) prolonged amphetamine-type substance, cocaine, or other stimulant use. B. Dysphoric mood and two (or more) of the following physiological changes, developing within a few hours to several days after Criterion A: 1. Fatigue. 2. Vivid, unpleasant dreams. 3. Insomnia or hypersomnia. 4. Increased appetite. 5. Psychomotor retardation or agitation. C. The signs or symp…	American Psychiatric Association [APA], 2013	Diagnostic and Statistical Manual of Mental Disorders, 5th ed. by American Psychiatric Association (2013)	Do not use to dispel the ill effects of previous use such as fatigue or depression.	2,10		Evitar el uso de cocaína para contrarrestar los efectos secundarios del uso anterior (síndrome de abstinencia)
							Clinicians have observed two types of reactions probably due to cocaine withdrawal: (1) following a short course of high dose cocaine use, there is a two to four day period in which the person is apathetically depressed, fatigued, and exhausted; and (2) following chronic high-dose use of cocaine, the withdrawal period is characterized by an agitated depression, lethargy, insomnia, and irritabilit…	Cregler, 1989	Cregler, L. L. (1989), ‘Adverse health consequences of cocaine abuse’, Journal of the National Medical Association, 81, p. 27.
							Dr. Frank Gawin has stated that “the fundamental effect of cocaine is the magnification of the intensity of almost all normal pleasures.”26(p1581) This is an obvious reason why a person repeatedly uses cocaine. However, he has also described the patterns that evolve when cocaine is stopped: the cocaine abstinence syndrome. This syndrome often involves a “crash” and a withdrawal phase. During the …	Morton, 1999	Morton W. A. (1999). Cocaine and Psychiatric Symptoms. Primary care companion to the Journal of clinical psychiatry, 1(4), 109–113. https://doi.org/10.4088/pcc.v01n0403
						Use disorder related to hereditary factors	This seems to indicate that opiate addiction in addition to cocaine addiction has particularly strong inheritance patterns.	Ray Hsiao MD, Jon McClellan MD. (2008) Substance Abuse in Early Onset Psychotic Disorders. Journal of Dual Diagnosis 4:1, pages 87-99.	Ray Hsiao MD, Jon McClellan MD. (2008) Substance Abuse in Early Onset Psychotic Disorders. Journal of Dual Diagnosis 4:1, pages 87-99.			Conozco los riesgos de consumir cocaína si tengo antecedentes familiares de trastorno por uso de sustancias
							Elevation in risk of this magnitude places a family history of drug disorder as one of the most potent risk factors for the development of drug disorders. These results suggest that there may be risk factors that are specific to particular classes of drugs as well as risk factors that underlie substance disorders in general.	Merikangas et al. 1998	Merikangas, K. R., Stolar, M., Stevens, D. E., Goulet, J., Preisig, M. A., Fenton, B., Zhang, H., O'Malley, S. S., & Rounsaville, B. J. (1998). Familial transmission of substance use disorders. Archives of general psychiatry, 55(11), 973–979. https://doi.org/10.1001/archpsyc.55.11.973
							Alcohol, marijuana, and cocaine dependence and habitual smoking are all familial, and there is evidence of both common and specific addictive factors transmitted in families. This specificity suggests independent causative factors in the development of each type of substance dependence.	Bierut et al. 1998	Bierut, L. J., Dinwiddie, S. H., Begleiter, H., Crowe, R. R., Hesselbrock, V., Nurnberger, J. I., Jr, Porjesz, B., Schuckit, M. A., & Reich, T. (1998). Familial transmission of substance dependence: alcohol, marijuana, cocaine, and habitual smoking: a report from the Collaborative Study on the Genetics of Alcoholism. Archives of general psychiatry, 55(11), 982–988. https://doi.org/10.1001/archpsy…				Evitar el uso de cocaína si se tiene antecedentes familiares de trastorno por uso de sustancias
							Genetic epidemiologic studies support a high degree of heritable vulnerability for both opioid and cocaine dependence. Polymorphisms in the genes coding for dopamine receptors and transporter, opioid receptors, endogenous opioid peptides, cannabinoid receptors, and serotonin receptors and transporter all appear to be associated with the phenotypic expression of this vulnerability once opioids or …	Saxon et al. 2005	Saxon, A. J., Oreskovich, M. R., & Brkanac, Z. (2005). Genetic determinants of addiction to opioids and cocaine. Harvard review of psychiatry, 13(4), 218–232. https://doi.org/10.1080/10673220500243364
						Increased risk of dependence by route of administration	Among persons who had recently started to use cocaine HCl powder but not crack cocaine, about 5–12% experienced clinical features of cocaine dependence. Most clinical features occurred 2–3 times more often among crack smoking users as compared to those using powder only, even with statistical adjustment for frequency of cocaine use (P<0.01). This crack-associated excess risk is more prominent for…	Chen et al. 2004	Chen, CY., Anthony, J.C. Epidemiological estimates of risk in the process of becoming dependent upon cocaine: cocaine hydrochloride powder versus crack cocaine. Psychopharmacology 172, 78–86 (2004). https://doi.org/10.1007/s00213-003-1624-6	The most harmful way to take cocaine is by injecting it, especially when combined with heroin (“speedballs”). The least harmful way of taking cocaine is by snorting: the effects come on gradually and last longer than other forms of use.	6,9,10,13		Prefiero vías de administración de menor riesgo, por ejemplo esnifada
			Drug-specific impairment of mental functioning	Drug-specific impairment of mental functioning—eg, amfetamine-induced psychosis, ketamine intoxication	Trastornos derivados del uso de cocaína p.ej. trastorno psicótico, trastornos afectivo bipolar, trastorno depresivo, trastorno de ansiedad, trastorno obsesivo compulsivo, trastono del sueño, trastorno sexual, trastorno delirante.	Stimulant-induced disorders	Stimulant-induced psychotic disorder ("Schizophrenia Spectrum and Other Psychotic Disorders")	American Psychiatric Association [APA], 2013	Diagnostic and Statistical Manual of Mental Disorders, 5th ed. by American Psychiatric Association (2013)	Information about mental health risks	2,13,12	Conozco los signos y síntomas de otros trastornos mentales derivados del uso de cocaína como p.ej. psicosis, trastorno bipolar, depresión, ansiedad, obsesividad, trastornos del sueño, trastornos sexuales, delirio.
							Paranoia and suspiciousness are often initial symptoms of psychosis. Paranoia occurs in 68% to 84% of patients using cocaine.5,6 Cocaine-induced paranoia can be transient, lasting a few hours5 or as long as days or weeks.7 Prior exposure to cocaine has been clinically correlated with suspiciousness, a precursor to paranoia.8 Patients with ongoing, chronic psychiatric disorders and who use cocaine…	Morton, 1999	Morton W. A. (1999). Cocaine and Psychiatric Symptoms. Primary care companion to the Journal of clinical psychiatry, 1(4), 109–113. https://doi.org/10.4088/pcc.v01n0403	Only use if you feel good mentally and physically.	2,13,15		Consumo cocaína solo si mi estado de animo es optimo
							These are hallucinations from prolonged stimulant use and resulting sleep deprivation (Frieden, 2006; Beek et al., 2001; Lee, 2008).	Grund et al. 2010	Grund, J. P., Coffin, P., Jauffret-Roustide, M., Dijkstra, M., De Bruin, D., & Blanken, P. (2010). The fast and furious—cocaine, amphetamines and harm reduction. Monographs, 191.	If this is difficult for you, or if you have other mental or physical problems, you should seek professional help.	5,10		Busco asesoría profesional si percibo que aparecen signos y síntomas de otros trastornos mentales derivados del uso de cocaína como delirios, alucinaciones, depresión, manía, ansiedad, obsesividad, dificultad para dormir, pérdida de la libido o deseo sexual , etc.
							Stimulant-induced bipolar disorder ("Bipolar and Related Disorders")	American Psychiatric Association [APA], 2013	Diagnostic and Statistical Manual of Mental Disorders, 5th ed. by American Psychiatric Association (2013)
							Stimulant-induced depressive disorder ("Depressive Disorders")	American Psychiatric Association [APA], 2013	Diagnostic and Statistical Manual of Mental Disorders, 5th ed. by American Psychiatric Association (2013)
							Stimulant-induced anxiety disorder ("Anxiety Disorders")	American Psychiatric Association [APA], 2013	Diagnostic and Statistical Manual of Mental Disorders, 5th ed. by American Psychiatric Association (2013)				Evito el consumo de cocaína si se tengo antecedentes de psicosis, trastorno bipolar, depresión, ansiedad, obsesividad, trastornos del sueño, trastornos sexuales o delirio.
							Stimulant-induced obsessivecompulsive disorder ("Obsessive-Compulsive and Related Disorders")	American Psychiatric Association [APA], 2013	Diagnostic and Statistical Manual of Mental Disorders, 5th ed. by American Psychiatric Association (2013)
							Stimulant-induced sleep disorder ("Sleep-Wake Disorders")	American Psychiatric Association [APA], 2013	Diagnostic and Statistical Manual of Mental Disorders, 5th ed. by American Psychiatric Association (2013)
							Stimulant-induced sexual dysfunction ("Sexual Dysfunctions")	American Psychiatric Association [APA], 2013	Diagnostic and Statistical Manual of Mental Disorders, 5th ed. by American Psychiatric Association (2013)				Detengo el consumo de cocaína si percibo que aparecen signos y síntomas de otros trastornos derivados del uso de cocaína como delirios, alucinaciones, depresión, manía, ansiedad, obsesividad, dificultad para dormir, pérdida de la libido o deseo sexual , etc.
							Stimulant intoxication delirium	American Psychiatric Association [APA], 2013	Diagnostic and Statistical Manual of Mental Disorders, 5th ed. by American Psychiatric Association (2013)
							Delirium, a potentially fatal syndrome marked by severe, fluctuating confusion and autonomic nervous system instability (such as severe blood pressure changes, pulse changes, and sweating), can occur with cocaine use. Changes in dopamine, norepinephrine, and serotonin levels have been associated with these effects. Delirium can be accompanied by psychotic symptoms (such as paranoia, hallucination…	Morton W. A. (1999). Cocaine and Psychiatric Symptoms. Primary care companion to the Journal of clinical psychiatry, 1(4), 109–113. https://doi.org/10.4088/pcc.v01n0403	Morton W. A. (1999). Cocaine and Psychiatric Symptoms. Primary care companion to the Journal of clinical psychiatry, 1(4), 109–113. https://doi.org/10.4088/pcc.v01n0403
			Drug-related impairment of mental functioning	Drug-related impairment of mental functioning—eg, mood disorders secondary to drug-user’s lifestyle or drug use	Otros trastornos mentales secundarios al uso de cocaína p. ej. trastornos de la conducta alimentaria, trastornos por uso de otras sustancias.	Eating disorders	Many individuals with compulsive use patterns have eating disorders and can experience massive weight loss. 138	Cregler, 1989	Cregler, L. L. (1989), ‘Adverse health consequences of cocaine abuse’, Journal of the National Medical Association, 81, p. 27.	Information about other riks for heatlh	2,12,13	Conozco los signos y síntomas del otros trastornos mentales secundarios al uso de cocaína como trastornos de alimentación, disfunción sexual o trastorno por uso de otras sustancias.
						Sexual dysfunction	Sexual dysfunction is one of the primary motivating factors for seeking treatment for compulsive use of cocaine. A common myth is that cocaine is an aphrodisiac and enhances sexual performance. At low doses, cocaine can delay ejaculation and orgasm as well as cause elevated mood and heightened sensory awareness. These effects together can often produce an improved sexual experience.140 Chronic ma…	Cregler, 1989	Cregler, L. L. (1989), ‘Adverse health consequences of cocaine abuse’, Journal of the National Medical Association, 81, p. 27.
						Alcohol use disorder	Cocaine powder users reported more frequent heavy drinking than crack users.	Gossop et al. 2006)	Gossop, M., Manning, V., & Ridge, G. (2006). Concurrent use of alcohol and cocaine: differences in patterns of use and problems among users of crack cocaine and cocaine powder. Alcohol and alcoholism (Oxford, Oxfordshire), 41(2), 121–125. https://doi.org/10.1093/alcalc/agh260				Evito el consumo de cocaína si tengo antecedente de otros trastornos mentales secundarios al uso de cocaína como trastornos de alimentación o trastorno por uso de otras sustancias.
							Epidemiological studies indicate that simultaneous abuse of powder cocaine and alcohol is widespread	Grant & Harford, 1990	Grant, B. F., & Harford, T. C. (1990). Concurrent and simultaneous use of alcohol with cocaine: results of national survey. Drug and alcohol dependence, 25(1), 97–104. https://doi.org/10.1016/0376-8716(90)90147-7
						Polydrug abuse	Polydrug abuse is a phenomenon reported by cocaine users in several other studies [7, 10, 22]	Guindalini, C., Vallada, H., Breen, G. et al. Concurrent crack and powder cocaine users from Sao Paulo: Do they represent a different group?. BMC Public Health 6, 10 (2006). https://doi.org/10.1186/1471-2458-6-10	Guindalini, C., Vallada, H., Breen, G. et al. Concurrent crack and powder cocaine users from Sao Paulo: Do they represent a different group?. BMC Public Health 6, 10 (2006). https://doi.org/10.1186/1471-2458-6-10				Detener el consumo de cocaína si se evidencias signos y síntomas de otros trastornos mentales secundarios al uso de cocaína como trastornos de alimentación, disfunción sexual o trastorno por uso de otras sustancias.
								Dunn et al. 1996	Dunn J, Laranjeira RR, Da Silveira DX, Formigoni ML, Ferri CP: Crack cocaine: an increase in use among patients attending clinics in Sao Paulo: 1990–1993. Subst Use Misuse. 1996, 31: 519-27.
								Ferri et al. 2001	Ferri CP, Gossop M, Laranjeira RR: High dose cocaine use in Sao Paulo: a comparison of treatment and community samples. Subst Use Misuse. 2001, 36: 237-55. 10.1081/JA-100102624.	If this is difficult for you, or if you have other mental or physical problems, you should seek professional help.	5,10		Busco asesoría profesional si percibo que aparecen signos y síntomas de otros trastornos mentales secundarios al uso de cocaína como trastornos de alimentación, disfunción sexual o trastorno por uso de otras sustancias.
								Prinzleve et al. 2004	Prinzleve, M., Haasen, C., Zurhold, H., Matali, J. L., Bruguera, E., Gerevich, J., Bácskai, E., Ryder, N., Butler, S., Manning, V., Gossop, M., Pezous, A. M., Verster, A., Camposeragna, A., Andersson, P., Olsson, B., Primorac, A., Fischer, G., Güttinger, F., Rehm, J., … Krausz, M. (2004). Cocaine use in Europe - a multi-centre study: patterns of use in different groups. European addiction researc…
						Greater risk of developing future problems associated with moderate internal negative psychological states	The results of the regression analyses suggest that high scores on the functions scale were strongly predictive of high scores on the problem scale. Closer examination of the data revealed that the majority of the variance accounted for by scores on the function scale seemed to be explained by those who reported using cocaine to make themselves feel better when they were feeling down or depressed…	Boys et al. 2000	Boys, A., Marsden, J., Griffiths, P., & Strang, J. (2000). Drug use functions predict cocaine-related problems in young people. Drug and Alcohol Review, 19(2), 181–190. doi:10.1080/713659316				Evito el consumo de cocaína si me han diagnosticado algún trastorno por uso de otra sustancia psicoactiva
						Psychiatric and social comorbidities	High levels of psychiatric and social comorbidities, in addition to dependence and addiction, are found among chronic stimulant users (Hall et al., 1996; Baker et al., 2004; Darke et al., 2008; Sutcliffe et al., 2009).	Grund et al. 2010	Grund, J. P., Coffin, P., Jauffret-Roustide, M., Dijkstra, M., De Bruin, D., & Blanken, P. (2010). The fast and furious—cocaine, amphetamines and harm reduction. Monographs, 191.	Only use if you feel good mentally and physically.	2,13,15		Consumo cocaína solo si mi estado de animo es optimo
						Psychiatric complications	Psychiatric complications include euphoria, dysphoria, agitation, anxiety, suicidal ideation, paranoid psychosis, and severe depression. In some cases, psychiatric illness may be the presenting manifestation of cocaine abuse.'45-148 Cocaine has been associated with multiple psychiatric syndromes rather than a single illness. There is an orderly progression of clinical syndromes with cocaine use t…	Cregler, 1989	Cregler, L. L. (1989), ‘Adverse health consequences of cocaine abuse’, Journal of the National Medical Association, 81, p. 27.

## Sheet: 1.3 Social 
	Related	Categories	Subcategories	Definición		Harm	Evidence	Referencia	Referencia	Harm reduction recomendation	Reference	Protective cognitive strategies	Protective behavioral strategies	D
		Social	Loss of tangibles	Extent of loss of tangible things (eg, income, housing, job, educational achievements, criminal record, imprisonment)	Perdidas tangibles o intangibles p.ej. perdidas materiales, economicas, perdida del empleo, el hogar, deserción escolar.	Loss of all monetary assets	Callers reported numerous social, familial, financial, and employment problems associated with their cocaine use. These included: loss of all monetary assets (42%).	Washton et al. 1984	Washton, Arnold M, and Mark S Gold. “Chronic Cocaine Abuse: Evidence for Adverse Effects on Health and Functioning.” Psychiatric annals 14.10 (1984): 733–743. Web.	(only go out with enough money for a limit amount of number of doses and stick to it).	12		El consumo de cocaína afecta mis finanzas personales
													El consumo de cocaína me ha causado pérdidas materiales
							Limit money spent on [cocaine]	Novik & Boekeloo, 2011	Novik, M. G., & Boekeloo, B. O. (2011). Dimensionality and psychometric analysis of an alcohol protective behavioral strategies scale. Journal of drug education, 41(1), 65–78. https://doi.org/10.2190/DE.41.1.d
						Unemployed and economics problems	Problem stimulant users are more likely to be unemployed and experience poor coping skills, limited social support, and disorganised lifestyles (Scott et al., 2007) Furthermore, the criminal and stigmatised nature of stimulant use, while possibly deterring wider use, serves as a barrier for problem users to participate in productive society Grabowski et al., 2004).	Grund et al. 2010	Grund, J. P., Coffin, P., Jauffret-Roustide, M., Dijkstra, M., De Bruin, D., & Blanken, P. (2010). The fast and furious—cocaine, amphetamines and harm reduction. Monographs, 191.	Be on the lookout if: You spend a lot of money or start having debts to be able to pay it off.	5		He perdido mi trabajo por mi consumo de cocaína
							Cocaine use is associated with lost jobs	Daley et al. 2002	Daley, D. C., Mercer, D. and Carpenter, G. (2002), Drug counseling for cocaine addiction: the collaborative cocaine treatment study model, National Institute on Drug Abuse, Bethesda, Maryland.
							Several types of drug use are related to the risk of being fired or resigning from a job	Hoffmann & Larison, 1999	Hoffmann, J., & Larison, C. (1999). Drug Use, Workplace Accidents and Employee Turnover. Journal of Drug Issues, 29(2), 341–364. https://doi.org/10.1177/002204269902900212
							Callers reported numerous social, familial, financial, and employment problems associated with their cocaine use. These included: loss of job (25%)	Washton et al. 1984	Washton, Arnold M, and Mark S Gold. “Chronic Cocaine Abuse: Evidence for Adverse Effects on Health and Functioning.” Psychiatric annals 14.10 (1984): 733–743. Web.
						Absenteeism coupled with reduced productivity at work	Callers reported numerous social, familial, financial, and employment problems associated with their cocaine use. They reported absenteeism coupled with reduced productivity at work (40%).	Washton et al. 1984	Washton, Arnold M, and Mark S Gold. “Chronic Cocaine Abuse: Evidence for Adverse Effects on Health and Functioning.” Psychiatric annals 14.10 (1984): 733–743. Web.
						Homeless	Cocaine use was quite prevalent in these homeless samples, with around one-third of samples endorsing lifetime use and one-fourth endorsing past year use. Further, prevalence rates for cocaine use problems ranged from around one-fourth to more than one-third across different measurement periods. The median prevalence rate for lifetime cocaine use disorder across studies was 30%. Comparatively, co…	Perez et al. 2022	Perez, G.R., Ustyol, A., Mills, K.J. et al. The Prevalence of Cocaine Use in Homeless Populations: A Systematic Review. Curr Treat Options Psych 9, 246–279 (2022). https://doi.org/10.1007/s40501-022-00271-5				He perdido mi hogar por mi consumo de cocaína
							Sixty-three per cent (244) reported that their drug or alcohol use was one of the reasons they first became homeless, but the majority (80%, 310) had used at least one additional drug since then. Overall, drug and alcohol use, injecting, daily use and dependency increased the longer the respondents had been homeless. A clear link exists between substance use and homelessness: initiatives to tackl…	Fountain, et al. 2003	Jane Fountain, Samantha Howes, John Marsden, Colin Taylor & John Strang (2003) Drug and Alcohol Use and the Link with Homelessness: Results from a Survey of Homeless People in London, Addiction Research & Theory, 11:4, 245-256, DOI: 10.1080/1606635031000135631
							We found that almost half of homeless and unstably housed women used stimulants at baseline and 14% of those who did not use began within 6 months.	Riley et al. 2015	Riley, E. D., Shumway, M., Knight, K. R., Guzman, D., Cohen, J., & Weiser, S. D. (2015). Risk factors for stimulant use among homeless and unstably housed adult women. Drug and Alcohol Dependence, 153, 173–179. doi:10.1016/j.drugalcdep.2015.05.023
						School dropout	The main findings point to a largely consistent relationship between dropping out of high school and substance use.	Townsend et al. 2007	Townsend, L., Flisher, A.J. & King, G. A Systematic Review of the Relationship between High School Dropout and Substance Use. Clin Child Fam Psychol Rev 10, 295–317 (2007). https://doi.org/10.1007/s10567-007-0023-7				He abandonado mis estudios por mi consumo de cocaína
							Twenty-eight teenagers in a drug rehabilitation program were identified as heavy cocaine users and questioned about their experiences. They reported school drop-out (24%).	Smith et al. 1989	Deborah E. Smith, Richard H. Schwartz, David M. Martin; Heavy Cocaine Use by Adolescents. Pediatrics April 1989; 83 (4): 539–542. 10.1542/peds.83.4.539	If this is difficult for you, or if you have other mental or physical problems, you should seek professional help.	5,10		Busco asesoría profesional si mi consumo de cocaína me ocasiona pérdidas materiales, económicas, perdida del empleo, el hogar, deserción escolar.
							During 1990, 80.6% of high school seniors used alcohol, and 32.5% used some illicit drugs. Use of marijuana, cocaine, and stimulants were 27%, 5.3%, and 9%, respectively. ~ Recent studies from several disciplines reveal sets of related risk factors that are either predictive of or associated with adolescent drug involvement, e’9 Ghief among these are low school performance, school dropout, and/or…	Eggert et al. 1994	Eggert, L. L., Thompson, E. A., Herting, J. R., Nicholas, L. J., & Dicker, B. G. (1994). Preventing Adolescent Drug Abuse and High School Dropout through an Intensive School-Based Social Network Development Program. American Journal of Health Promotion, 8(3), 202–215. doi:10.4278/0890-1171-8.3.202				Detengo el consumo de cocaína si mi consumo de cocaína me ocasiona pérdidas materiales, económicas, perdida del empleo, el hogar, deserción escolar.
			Loss of relationships	Extent of loss of relationship with family and friends	Perdidas sociales p.ej. relaciones de amistad, relaciones familiares.	Lost relationships	Cocaine use is associated with damaged or lost relationships	Daley et al. 2002	Daley, D. C., Mercer, D. and Carpenter, G. (2002), Drug counseling for cocaine addiction: the collaborative cocaine treatment study model, National Institute on Drug Abuse, Bethesda, Maryland.				El consumo de cocaína me ha hecho perder relaciones p.ej. de amistad o familiares
							Callers reported numerous social, familial, financial, and employment problems associated with their cocaine use. These included: loss of spouse (26%), loss of friends (51%)	Washton et al. 1984	Washton, Arnold M, and Mark S Gold. “Chronic Cocaine Abuse: Evidence for Adverse Effects on Health and Functioning.” Psychiatric annals 14.10 (1984): 733–743. Web.				Busco asesoría profesional si mi consumo de cocaína me ocasiona pérdidas en relaciones personales p.ej. relaciones con la familia

## Sheet: 2. To others 
	Related	Categories	Subcategories	Definición		Harm	Evidence	Referencia	Referencia	Harm reduction recomendation	Reference	Protective cognitive strategies	Protective behavioral strategies	D
	To others	Physical and psychological	Injury	Extent to which the use of a drug increases the chance of injuries to others both directly and indirectly—eg, violence (including domestic violence), traffi c accident, fetal harm, drug waste, secondary transmission of blood-borne viruses	Daño físio o psiclógico a terceros	Risks to the fetus	Risk factors for bad outcomes among drug-using pregnant women include lack of prenatal care, prior premature delivery, and active cigarette smoking (Kuczkowski, 2007; Ness et al., 1999). Cocaine use during pregnancy is more likely than opiates, tobacco, and marijuana to be associated with fetal growth decrements (Schempf, 2007), and is associated with abruptio placenta and premature rupture of me…	Grund, J. P., Coffin, P., Jauffret-Roustide, M., Dijkstra, M., De Bruin, D., & Blanken, P. (2010). The fast and furious—cocaine, amphetamines and harm reduction. Monographs, 191.	Grund, J. P., Coffin, P., Jauffret-Roustide, M., Dijkstra, M., De Bruin, D., & Blanken, P. (2010). The fast and furious—cocaine, amphetamines and harm reduction. Monographs, 191.	Do not use during pregnancy.	2		Evito el uso de cocaína durante el embarazo y la lactancia
						Obstetrical Complications	Cocaine exerts a deleterious influence on the outcome of pregnancy.88 Hypertension and vasoconstriction could be responsible for abruptio placentae, given the documented association between hypertension and this condition. Obstetricians should be aware of the potentially serious consequences of recreational abuse of this drug during pregnancy and that cocaine-induced transient hypertension may be…	Cregler, L. L. (1989), ‘Adverse health consequences of cocaine abuse’, Journal of the National Medical Association, 81, p. 27.	Cregler, L. L. (1989), ‘Adverse health consequences of cocaine abuse’, Journal of the National Medical Association, 81, p. 27.
						Violence	The likelihood of violence associated with crack cocaine users was greater compared to powdered cocaine users at the bivariate level. However, these differences were almost uniformly statistically nonsignificant when demographic, mood and non-cocaine substance use disorders were controlled for. The substantial attenuation of the association of crack cocaine use with violence after adjustment sugg…	Michael G. Vaughn, Qiang Fu, Brian E. Perron, Amy S. B. Bohnert & Matthew O. Howard (2010) Is Crack Cocaine Use Associated with Greater Violence than Powdered Cocaine Use? Results from a National Sample, The American Journal of Drug and Alcohol Abuse, 36:4, 181-186, DOI: 10.3109/00952990.2010.491877	Michael G. Vaughn, Qiang Fu, Brian E. Perron, Amy S. B. Bohnert & Matthew O. Howard (2010) Is Crack Cocaine Use Associated with Greater Violence than Powdered Cocaine Use? Results from a National Sample, The American Journal of Drug and Alcohol Abuse, 36:4, 181-186, DOI: 10.3109/00952990.2010.491877	Try to stay calm. Cocaine exalts the personality and can induce you to take aggressive or impulsive attitudes.	12		Continuo consumiendo cocaína aun cuando he percibido aumento de la agresividad, irritabilidad y violencia.
							Violence has been associated with cocaine use. Cocaine-induced psychiatric symptoms undoubtedly contribute to the emergence of violence. In a study of 31 patients with cocaine-induced psychiatric symptoms, 55% had cocaine-related violent behaviors.7 In a telephone survey of 452 cocaine users, the following symptoms were reported: anger (42%), violence (32%), and suspiciousness or paranoia (84%).6…	Morton W. A. (1999). Cocaine and Psychiatric Symptoms. Primary care companion to the Journal of clinical psychiatry, 1(4), 109–113. https://doi.org/10.4088/pcc.v01n0403	Morton W. A. (1999). Cocaine and Psychiatric Symptoms. Primary care companion to the Journal of clinical psychiatry, 1(4), 109–113. https://doi.org/10.4088/pcc.v01n0403
							Connection between violence and psychiatric symptoms. One investigator has postulated that cocaine may produce impatience, irritability, paranoia, and edginess leading to violent behavior.21 In general, all substance use has been associated with the inability to inhibit hostile and aggressive impulses.22 The neurotransmitter norepinephrine, released by cocaine, is also involved in “fight-or-fligh…	Morton W. A. (1999). Cocaine and Psychiatric Symptoms. Primary care companion to the Journal of clinical psychiatry, 1(4), 109–113. https://doi.org/10.4088/pcc.v01n0403	Morton W. A. (1999). Cocaine and Psychiatric Symptoms. Primary care companion to the Journal of clinical psychiatry, 1(4), 109–113. https://doi.org/10.4088/pcc.v01n0403
		Social	Crime	Extent to which the use of a drug involves or leads to an increase in volume of acquisitive crime (beyond the use-ofdrug act) directly or indirectly (at the population level, not the individual level)	Delitos	Non-violent drug-related crimes	the majority of the drug laws in Latin America and the Caribbean have centered on punishing drug users	Rossi, D., Harris, S., & Vitarelli-Batista, M. (2009). The impacts of the Drug War in Latin America and the Caribbean. In At what cost.	Rossi, D., Harris, S., & Vitarelli-Batista, M. (2009). The impacts of the Drug War in Latin America and the Caribbean. In At what cost.	Information on current legislation	2,7,9,12	Conozcola lesgistación vigente sobre el porte de sustancias
							This “Law against low level drug traffic” states the possibility of not imposing prison penalties to those persons who are found with 5 or less grams of cannabis, provided that it is intended for personal use (United States Senate Caucus, 2012), Table 2. However, although the legislation appears to decriminalise the possession for use, in actual practice, a prohibitionist policy is maintained. Co…	Heinze G, Armas-Castañeda G. Public policies on the use of drugs in Mexico and Latin America. Drug Science, Policy and Law. 2016;2. doi:10.1177/2050324515611587	Heinze G, Armas-Castañeda G. Public policies on the use of drugs in Mexico and Latin America. Drug Science, Policy and Law. 2016;2. doi:10.1177/2050324515611587	Do not participate in traffic.	2,5		Me he involucrado en la comisión de delitos relacionados con la sustancia p.ej. fabricación, venta; o aquellos relacionados con conseguir la sustancia o dinero para comprarla p.ej. hurto
							Human rights organisations in Latin America have identified many serious impacts on people’s rights stemming from the “War on Drugs”. The fact that so many people are being incarcerated for non-violent drug-related crimes further overpopulates prisons in the region.	https://www.penalreform.org/blog/failed-drug-policies-in-latin-america-impact-on/	https://www.penalreform.org/blog/failed-drug-policies-in-latin-america-impact-on/
						Violent crime	The presence of substance abuse and dependence are particularly associated with an increased risk of violent/homicidal behaviours [27]. Criminal activity was notably present in our sample. The Dual users groups were more likely to have been imprisoned in their life than the Powder Cocaine Users. Hatsukami and Fischman (1996) [17] reported crack cocaine to be linked with crime to a greater extent …	Guindalini, C., Vallada, H., Breen, G. et al. Concurrent crack and powder cocaine users from Sao Paulo: Do they represent a different group?. BMC Public Health 6, 10 (2006). https://doi.org/10.1186/1471-2458-6-10 Asnis GM, Kaplan ML, Hundorfean G, Saeed W: Violence and homicidal behaviours in psychiatric disorders. Psychiatr Clin North Am. 1997, 20: 405-25. 10.1016/S0193-953X(05)70320-8.	Guindalini, C., Vallada, H., Breen, G. et al. Concurrent crack and powder cocaine users from Sao Paulo: Do they represent a different group?. BMC Public Health 6, 10 (2006). https://doi.org/10.1186/1471-2458-6-10 Asnis GM, Kaplan ML, Hundorfean G, Saeed W: Violence and homicidal behaviours in psychiatric disorders. Psychiatr Clin North Am. 1997, 20: 405-25. 10.1016/S0193-953X(05)70320-8.				He cometido delitos violentos (lesiones personales, homicidio) mientras estoy bajo el efecto de la cocaína
							Homicide also has been associated with cocaine use. In New York City, 31% of 2824 homicide deaths were found to test positive for cocaine or its metabolite, benzoylecgonine.16 A marked number of residents of New York City (27%) who had fatal injuries also tested positive for cocaine use. Fatal injuries secondary to homicide accounted for 29% of these victims.17 Concurrent drug use, including alco…	Morton W. A. (1999). Cocaine and Psychiatric Symptoms. Primary care companion to the Journal of clinical psychiatry, 1(4), 109–113. https://doi.org/10.4088/pcc.v01n0403	Morton W. A. (1999). Cocaine and Psychiatric Symptoms. Primary care companion to the Journal of clinical psychiatry, 1(4), 109–113. https://doi.org/10.4088/pcc.v01n0403
							An adult general population survey in the US found a strong association between drug use, particularly cocaine use, and being charged with a violent crime (Harrison and Gfroerer, 1992). Harrison et al. (2001) found that cocaine use among adolescents was highly correlated with violence. In addition, abuse of illicit drugs has been found to predict subsequent violent behavior (Friedman, 1998).	Macdonald, S., Anglin-Bodrug, K., Mann, R. E., Erickson, P., Hathaway, A., Chipman, M., & Rylett, M. (2003). Injury risk associated with cannabis and cocaine use. Drug and Alcohol Dependence, 72(2), 99–115. doi:10.1016/s0376-8716(03)00202-3	Macdonald, S., Anglin-Bodrug, K., Mann, R. E., Erickson, P., Hathaway, A., Chipman, M., & Rylett, M. (2003). Injury risk associated with cannabis and cocaine use. Drug and Alcohol Dependence, 72(2), 99–115. doi:10.1016/s0376-8716(03)00202-3
						Delinquent behaviors such as stealing and vandalism	Twenty-eight teenagers in a drug rehabilitation program were identified as heavy cocaine users and questioned about their experiences. They reported delinquent behaviors such as stealing (96%) and vandalism (57%).	Deborah E. Smith, Richard H. Schwartz, David M. Martin; Heavy Cocaine Use by Adolescents. Pediatrics April 1989; 83 (4): 539–542. 10.1542/peds.83.4.539	Deborah E. Smith, Richard H. Schwartz, David M. Martin; Heavy Cocaine Use by Adolescents. Pediatrics April 1989; 83 (4): 539–542. 10.1542/peds.83.4.539				He cometido otros delitos (vandalismo) mientras estoy bajo el efecto de la cocaína
							Fifty-seven callers (11%) reported having an automobile accident while high on cocaine. Callers also reported dealing cocaine (39%) and stealing from work, family, or friends (29%) to support their cocaine habit. Sixty callers (12%) said they had been arrested for a cocainerelated crime (dealing or possession).	Washton, Arnold M, and Mark S Gold. “Chronic Cocaine Abuse: Evidence for Adverse Effects on Health and Functioning.” Psychiatric annals 14.10 (1984): 733–743. Web.	Washton, Arnold M, and Mark S Gold. “Chronic Cocaine Abuse: Evidence for Adverse Effects on Health and Functioning.” Psychiatric annals 14.10 (1984): 733–743. Web.
			Family adversities	Extent to which the use of a drug causes family adversities— eg, family breakdown, economic wellbeing, emotional wellbeing, future prospects of children, child neglect	Problemas familiares	Child abuse or neglect	Problem use of stimulants is also associated with child abuse or neglect (Daley et al., 2002)	Grund, J. P., Coffin, P., Jauffret-Roustide, M., Dijkstra, M., De Bruin, D., & Blanken, P. (2010). The fast and furious—cocaine, amphetamines and harm reduction. Monographs, 191.	Grund, J. P., Coffin, P., Jauffret-Roustide, M., Dijkstra, M., De Bruin, D., & Blanken, P. (2010). The fast and furious—cocaine, amphetamines and harm reduction. Monographs, 191.				El consumo de cocaína afecta mis relaciones familiares
							Cocaine use is associated with child abuse or neglect	Daley, D. C., Mercer, D. and Carpenter, G. (2002), Drug counseling for cocaine addiction: the collaborative cocaine treatment study model, National Institute on Drug Abuse, Bethesda, Maryland.	Daley, D. C., Mercer, D. and Carpenter, G. (2002), Drug counseling for cocaine addiction: the collaborative cocaine treatment study model, National Institute on Drug Abuse, Bethesda, Maryland.				He dejado de lado el cuidado de mis hijos por estar consumiendo cocaína o recuperandome del consumo
							City-level rates of drug abuse and dependence were related to more frequent physical abuse. Parents who use drugs in areas with greater availability of drugs reported more physical abuse and physical neglect.	Freisthler, B., Wolf, J. P., Wiegmann, W., & Kepple, N. J. (2017). Drug Use, the Drug Environment, and Child Physical Abuse and Neglect. Child Maltreatment, 22(3), 245–255. doi:10.1177/1077559517711042	Freisthler, B., Wolf, J. P., Wiegmann, W., & Kepple, N. J. (2017). Drug Use, the Drug Environment, and Child Physical Abuse and Neglect. Child Maltreatment, 22(3), 245–255. doi:10.1177/1077559517711042
							Children exposed to parents or other adults in their environment impaired by the direct psychopharmacological effects of cocaine ingestion may be at significant risk for lapses in parental care or protection, or may become the direct targets of maltreatment. Additional risk of child maltreatment may be generated by parental cocaine use in the presence of other psychiatric impairments, other sourc…	Famularo, R., Kinscherff, R., & Fenton, T. (1992). Parental substance abuse and the nature of child maltreatment. Child Abuse & Neglect, 16(4), 475–483. doi:10.1016/0145-2134(92)90064-x	Famularo, R., Kinscherff, R., & Fenton, T. (1992). Parental substance abuse and the nature of child maltreatment. Child Abuse & Neglect, 16(4), 475–483. doi:10.1016/0145-2134(92)90064-x				Detengo el consumo de cocaína si afecta mis relaciones familiares
						Unstable environments	Cocaine exposure in pregnant women, adolescent mothers, and newborns is common enough to prompt medical investigation (Chasnoff et al., 1985; Kozel & Adams, 1986; Osterloh & Lee, 1989; Shannon, Lacouture, Roa, & Woolf, 1989) and policy debates on the problem of “crack babies” and intraute~ne cocaine exposure. A recent study (Amaro, Zuckerman, & Cabral, 1989) found that a majority of a sample of p…	Famularo, R., Kinscherff, R., & Fenton, T. (1992). Parental substance abuse and the nature of child maltreatment. Child Abuse & Neglect, 16(4), 475–483. doi:10.1016/0145-2134(92)90064-x	Famularo, R., Kinscherff, R., & Fenton, T. (1992). Parental substance abuse and the nature of child maltreatment. Child Abuse & Neglect, 16(4), 475–483. doi:10.1016/0145-2134(92)90064-x
						Sexual maltreatment	Sixty-seven percent (127/190) of these cases involved parents who were classified as substance abusers. The results of this study revealed specific associations between (a) alcohol abuse and physical maltreatment and (b) cocaine abuse and sexual maltreatment. Logistic analyses, testing for the effects of poly substance abuse, revealed that additional forms of substance abuse failed to add signifi…	Famularo, R., Kinscherff, R., & Fenton, T. (1992). Parental substance abuse and the nature of child maltreatment. Child Abuse & Neglect, 16(4), 475–483. doi:10.1016/0145-2134(92)90064-x	Famularo, R., Kinscherff, R., & Fenton, T. (1992). Parental substance abuse and the nature of child maltreatment. Child Abuse & Neglect, 16(4), 475–483. doi:10.1016/0145-2134(92)90064-x
						Family problems	Callers reported numerous social, familial, financial, and employment problems associated with their cocaine use. They reported fighting and violent arguments (66%), threat of separation or divorce (27%)	Washton, Arnold M, and Mark S Gold. “Chronic Cocaine Abuse: Evidence for Adverse Effects on Health and Functioning.” Psychiatric annals 14.10 (1984): 733–743. Web.	Washton, Arnold M, and Mark S Gold. “Chronic Cocaine Abuse: Evidence for Adverse Effects on Health and Functioning.” Psychiatric annals 14.10 (1984): 733–743. Web.				Busco asesoría profesional si percibo afectación de mis relaciones familiares
						Shorter marriage durations	The results indicate that among non-Black young adults, drug users are more likely to be unmarried due to a delay in the age at first marriage, and shorter marriage durations.	Kaestner, R. (1997). The effects of cocaine and marijuana use on marriage and marital stability. Journal of Family Issues, 18(2), 145-173.	Kaestner, R. (1997). The effects of cocaine and marijuana use on marriage and marital stability. Journal of Family Issues, 18(2), 145-173.
						Social and family problems	Problem use of stimulants is also associated with social and family problems, including poor interpersonal relationships (Daley et al., 2002)	Grund, J. P., Coffin, P., Jauffret-Roustide, M., Dijkstra, M., De Bruin, D., & Blanken, P. (2010). The fast and furious—cocaine, amphetamines and harm reduction. Monographs, 191.	Grund, J. P., Coffin, P., Jauffret-Roustide, M., Dijkstra, M., De Bruin, D., & Blanken, P. (2010). The fast and furious—cocaine, amphetamines and harm reduction. Monographs, 191.
			Environmental damage	Extent to which the use and production of a drug causes environmental damage locally—eg, toxic waste from amfetamine factories, discarded needles	These categories will not be included since they are hardly influenced by the individual behavior of the cocaine user.
			International damage	Extent to which the use of a drug in the UK contributes to damage internationally—eg, deforestation, destabilisation of countries, international crime, new markets
			Economic cost	Extent to which the use of a drug causes direct costs to the country (eg, health care, police, prisons, social services, customs, insurance, crime) and indirect costs (eg, loss of productivity, absenteeism)
			Community	Extent to which the use of a drug creates decline in social cohesion and decline in the reputation of the community

## Sheet: Harm reduction references 
		Author	Location				APA Reference
		The Loop	UK	https://twitter.com/WeAreTheLoopUK/status/1417879226628382721?ref_src=twsrc%5Etfw	Cocaine	1	The Loop [WeAreTheLoopUK]. (2021, julio 21). Cocaine harm reduction | HIGH ALERT | @MetroUK @EllenCScott https://t.Co/clMfGL5V28🧵 pic.twitter.com/uhzffsf5kf. Twitter. https://twitter.com/	✅
		Jellinek	NL	https://www.jellinek.nl/informatie-over-alcohol-drugs/drugs/cocaine/	Cocaine	2	Alles over cocaïne (coke) - informatie van experts. (2019, julio 18). Jellinek. https://www.jellinek.nl/informatie-over-alcohol-drugs/drugs/cocaine/	✅
		ANKORS	Canada	https://combo.tripsit.me	Cocaine	3	Drug combinations. (s/f). Tripsit.Me. Recuperado el 28 de septiembre de 2022, de https://combo.tripsit.me	✅
		Ailaket-España	Ailaket	http://www.ailaket.com/?paged=69				❌
		Kosmicare	Portugal	https://kosmicare.org/	Cocaine	4	Kosmicare — cocaine. (s/f). Kosmicare. Recuperado el 28 de septiembre de 2022, de https://kosmicare.org/cocaine/	✅
		Energy control	España	https://energycontrol.org/infodrogas/	Cocaine	5	Cocaína. (2020, agosto 8). Energy Control. https://energycontrol.org/sustancias/cocaina/	✅
		Borgorete	Italia	https://www.borgorete.it/servizi/dipendenze/interventi-di-riduzionelimitazione-dei-rischi				❌
		saferparty	Suiza	https://en.saferparty.ch/substanzen	Cocaine	6	Cocaine. (s/f). Saferparty.Ch. Recuperado el 30 de septiembre de 2022, de https://en.saferparty.ch/substanzen/kokain	✅
		Drogart	Slovenia	https://www.drogart.org/droge.html	Cocaine	7	Petroianu, G., & Osswald, P. M. (2000). Kokain. En Anästhesie in Frage und Antwort (pp. 103–105). Springer Berlin Heidelberg.	✅
					Sniff material	8	DROGARTOV MATERIAL: SNIF LISTKI IN PRIJATELJI. (s/f). DrogArt. Recuperado el 30 de septiembre de 2022, de https://www.drogart.org/droge/5688/drogartov-material-snif-listki-in.html	✅
		Checkit	Austria	https://checkit.wien/substanzen/	Cocaine	9	checkit! (s/f). Checkit.wien. Recuperado el 30 de septiembre de 2022, de https://checkit.wien/substanzen/kokain/	✅
					safer sniffing rules"	10	checkit! (s/f-b). Checkit.wien. Recuperado el 30 de septiembre de 2022, de https://checkit.wien/infos/gesundheitstipps/risikoreduzierung/	✅
		knowdrugs	Nueva Zelanda	https://knowdrugs.app/#substanceinfo	App			❌
		PIPAPO	Luxenburgo	https://pipapo.lu/information/				❌
		Intercambios	Argentina	https://www.intercambios.org.ar/materiales.html	Cocaína	11	Intercambios Argentina(S/f). Cocaína. Recuperado el 30 de septiembre de 2022, de https://www.intercambios.org.ar/assets/files/cocaina.pdf	✅
		Asociación de Reducción de Daños de Argentina (ARDA)	Argentina					❌
		Programa de Análisis de sustancias	México	http://www.analizatusustancia.org/sustancias.html	Cocaína	12	Analiza Tu Sustancia (S/f-b). Analizatusustancia.org. Recuperado el 30 de septiembre de 2022, de http://www.analizatusustancia.org/pdfs/sustancias/COCAINA.pdf	✅
		Deliberar	Colombia	https://www.deliberar.org/copia-de-biblioteca	Cocaína	13	Cocaína. (s/f). #Deliberar Colombia. Recuperado el 30 de septiembre de 2022, de https://www.deliberar.org/cocaina	✅
		Échele cabeza	Colombia	https://www.echelecabeza.com/infosustancias/	Cocaína	14		✅
		Soma	Peru
		Intercambios	Puerto Rico
					Chem sex
				https://metro.co.uk/2021/07/21/cocaine-how-to-reduce-the-risk-of-harm-when-taking-the-drug-14957246/			Scott, E. (2021, julio 21). How to reduce the risk of harm when taking cocaine. Metro.co.uk. https://metro.co.uk/2021/07/21/cocaine-how-to-reduce-the-risk-of-harm-when-taking-the-drug-14957246/
